# Supplementary material for: Genomic prediction and selection response for grain yield in safflower
Source: Front Genet. 2023 Mar 27;14:1129433. doi: 10.3389/fgene.2023.1129433 (PMC10083426; doi:10.3389/fgene.2023.1129433)
Supplement: Supplementary file 1 [file Table2.XLSX]

## Sheet: Sheet1
Genomic prediction and selection response for grain yield in safflower
Huanhuan Zhao1,2*, Zibei Lin2, Majid Khansefid1,2, Josquin F. Tibbits2, Matthew J. Hayden1,2
1 School of Applied Systems Biology, La Trobe University, Bundoora, VIC 3083, Australia
2 Agriculture Victoria, AgriBio, Centre for AgriBioscience, Bundoora, VIC 3083, Australia
* Corresponding author Huanhuan Zhao, huan.zhao@agriculture.vic.gov.au

## Sheet: supptable1
Table S1. The phenotypes of safflower accessions for all traits at each site. Note: DF, days to flowering; DM, days to maturity; FT, flowering time; PH, plant height; SW, seed weight; GY, grain yield; PC, seed protein content; OL, seed oil content. IR: site1; RF: site2; LR: site3; HR: site4.
Range	Row	Plot	Rep	lines	SW	PH	DF	GY	OL	PC	FT	DM	ENV
1	2	1	1	s43	27.04	107.2	152	0.42	24.1	15.4	20	202	IR
1	3	2	1	s268	27.58	113.2	154	3.86	29	15.2	23	206	IR
1	4	3	1	s75	20.63	118.6	157	3.82	35.5	15	22	208	IR
1	5	4	1	s306	30.1	110.8	159	3.66	26.7	15	21	206	IR
1	6	5	1	s149	18.04	110.6	160	2.17	30.2	15.1	21	209	IR
1	7	6	1	s69	21.97	111.8	159	2.12	31.7	15.8	22	212	IR
1	8	7	1	s131	19.36	114.2	157	4.19	34.5	15.1	23	211	IR
1	9	8	1	s93	19.21	113.8	159	3.97	33.4	15.3	20	210	IR
1	10	9	1	s76	22.37	104.2	158	2.6	34.3	15.1	19	208	IR
1	11	10	1	s259	19.39	96.2	155	3.67	31.7	15.8	21	208	IR
1	12	11	1	s411	21.83	112	155	5.11	35.3	14.9	21	207	IR
1	13	12	1	s209	20.43	99	158	2.54	27.6	15.3	22	208	IR
1	14	13	1	s242	24.24	104.8	158	4.05	26.6	15.2	23	211	IR
1	15	14	1	s284	19.57	*	*	0.17	30.4	14.3	*	*	IR
1	16	15	1	s293	18.31	106.6	153	3.41	29.3	15.4	27	206	IR
1	17	16	1	s367	17.06	108.4	158	4.22	36.1	15.3	23	212	IR
1	18	17	1	s168	14.74	84.4	159	0.8	34.9	19.6	22	210	IR
1	19	18	1	s59	18.78	118.4	163	1.9	30	15.2	23	211	IR
1	20	19	1	s290	19.33	*	*	*	35.2	14.8	*	*	IR
1	21	20	1	s390	15.86	100	167	1.11	33.4	15.2	19	216	IR
2	2	21	1	s300	21.12	138	163	2.51	27.3	14.4	20	209	IR
2	3	22	1	s280	25.64	*	*	0.04	28.9	14.9	*	*	IR
2	4	23	1	s227	19.06	85	158	0.19	34.6	16.3	25	*	IR
2	5	24	1	s238	20.45	117.6	163	3.71	28.3	14.9	25	215	IR
2	6	25	1	s275	25.65	108.4	159	3.26	26.4	14.3	22	209	IR
2	7	26	1	s423	18.47	86.4	153	1.63	28.6	16.4	22	200	IR
2	8	27	1	s71	18.57	115.6	157	4.67	37.9	14.5	22	208	IR
2	9	28	1	s317	21.4	108.6	161	1.93	28.3	15.1	25	209	IR
2	10	29	1	s85	17.88	117.6	157	3.99	35.1	15	20	207	IR
2	11	30	1	s270	24.74	120.6	157	5.46	27.4	13.8	21	206	IR
2	12	31	1	Filler	18.74	119	159	4.31	37.3	15.2	22	208	IR
2	13	32	1	s174	17.22	93	159	2.17	32.7	16.1	26	209	IR
2	14	33	1	s156	29.13	108.2	160	1.43	27.6	13.8	19	208	IR
2	15	34	1	s122	24.42	115.6	152	3.93	30.3	13.9	24	203	IR
2	16	35	1	s271	29.19	120	158	4.99	26.5	13.8	23	207	IR
2	17	36	1	s287	17.61	146.6	160	2.55	28.1	14.7	25	210	IR
2	18	37	1	s70	18.91	94.6	158	1.64	35.7	16.8	22	209	IR
2	19	38	1	s239	20.48	108.6	160	2.58	31.4	15.3	23	208	IR
2	20	39	1	s62	22.37	87.6	158	1.39	31.3	15	22	216	IR
2	21	40	1	s303	18.71	95	166	1.19	32	15.7	19	214	IR
3	2	41	1	s272	29.46	96.2	157	3.96	25.8	13.5	23	210	IR
3	3	42	1	s252	21.16	91.2	155	2.65	33.3	15	22	209	IR
3	4	43	1	s337	27.14	138.4	160	4.47	29.5	14.6	22	211	IR
3	5	44	1	s263	16.41	77.4	152	1.5	31.8	15	18	203	IR
3	6	45	1	s247	18.54	79.2	152	2.11	30.5	15.8	18	198	IR
3	7	46	1	s394	17.9	121	159	3.45	32.7	16.1	26	211	IR
3	8	47	1	s169	19.25	115	155	3.71	32.2	14.8	25	208	IR
3	9	48	1	s372	14.79	99.6	158	3.54	35.3	16	25	211	IR
3	10	49	1	s87	19.82	105.2	158	4.34	33.1	14.1	21	208	IR
3	11	50	1	s338	20.44	115.6	153	4.79	29.8	14.7	21	205	IR
3	12	51	1	Filler	18.18	117.2	158	4.99	37.2	15.1	22	211	IR
3	13	52	1	s46	16.91	*	*	0.04	33	14.8	*	*	IR
3	14	53	1	s90	20.37	109.4	161	4.86	34.8	14.1	20	214	IR
3	15	54	1	s134	18.15	100.2	157	2.97	35.1	14.7	23	207	IR
3	16	55	1	s206	25.38	102	157	5.57	27.1	13.7	24	206	IR
3	17	56	1	s100	17.84	73	160	0.22	30.9	14.8	25	214	IR
3	18	57	1	s389	16.16	83.2	160	1.3	34.6	16.3	21	214	IR
3	19	58	1	s187	22.83	87.8	159	2.16	27.4	15	20	207	IR
3	20	59	1	s207	30.89	92.6	159	2.45	28.7	15	21	212	IR
3	21	60	1	s116	24.15	74	154	0.28	31.7	15.5	26	216	IR
4	2	61	1	Filler	19.42	110	159	3.26	35.3	15.6	24	212	IR
4	3	62	1	s310	17.03	93.2	158	0.85	32.6	17.4	22	210	IR
4	4	63	1	s329	17.36	83.2	153	2.38	29.5	14.9	21	201	IR
4	5	64	1	s217	17.37	82	154	1.55	29.4	15.5	24	202	IR
4	6	65	1	s425	16.49	106.8	156	4.15	39.7	15	22	208	IR
4	7	66	1	s132	18.19	119.2	157	3.84	37.5	14.8	23	208	IR
4	8	67	1	s182	17.02	120.4	160	3	33.7	15.6	21	210	IR
4	9	68	1	s12	23.36	97.4	158	3.56	30	15.6	25	212	IR
4	10	69	1	s205	27.99	95.2	157	4.85	26.9	13.5	21	208	IR
4	11	70	1	s140	16.75	104	160	1.47	33.1	15.4	23	211	IR
4	12	71	1	s304	18.93	109.2	159	4.39	29.1	15.2	22	212	IR
4	13	72	1	s375	14.4	91.8	156	2.67	35.9	14.6	24	208	IR
4	14	73	1	s258	19.81	91	152	1.86	30.3	15.1	19	196	IR
4	15	74	1	s13	26.45	94	153	3.16	28.2	13.6	24	206	IR
4	16	75	1	s203	18.65	111.8	157	4.69	37.6	13	21	207	IR
4	17	76	1	s216	19.4	112.6	160	2.67	30.3	15.6	23	212	IR
4	18	77	1	s380	18.46	83.2	159	1.92	36.1	15	21	211	IR
4	19	78	1	s112	20.5	96	160	2.67	26.7	14.7	23	208	IR
4	20	79	1	s346	22.44	65.6	152	0.63	31.2	16.4	20	198	IR
4	21	80	1	s345	20.5	91.6	158	2.43	34.9	15.2	19	211	IR
5	2	81	1	s83	19.51	91.4	160	2.59	38.9	15	20	214	IR
5	3	82	1	s424	22.55	115	155	3.05	28.9	15	24	208	IR
5	4	83	1	s102	18.73	129.2	159	3.79	32.2	14.9	22	208	IR
5	5	84	1	s77	18.25	116	157	3.91	37.1	14.9	26	211	IR
5	6	85	1	s101	20.06	95.2	154	2.75	32.8	13.5	23	201	IR
5	7	86	1	s191	18.78	108	161	3.08	39.4	15.3	22	211	IR
5	8	87	1	s67	20.19	110.4	159	2.3	34.8	14.2	21	210	IR
5	9	88	1	s51	21.7	115.8	160	2.48	30.8	14.4	24	210	IR
5	10	89	1	s361	22.2	108.8	157	4.42	32.1	13.9	21	208	IR
5	11	90	1	s218	20.38	112.4	153	2.37	25.7	15.4	16	200	IR
5	12	91	1	s409	19.18	123.8	157	4.83	37.6	14.6	22	208	IR
5	13	92	1	s279	19.97	135	161	3.13	31.9	15.2	24	215	IR
5	14	93	1	s208	20.47	*	163	0.15	30.3	14.8	21	209	IR
5	15	94	1	s50	20.35	132.8	159	5.05	28.4	14.1	25	208	IR
5	16	95	1	s231	15.77	108.8	160	2.47	32.7	14.9	21	204	IR
5	17	96	1	s160	19.65	128.8	163	2.53	32.6	14.6	22	212	IR
5	18	97	1	s58	19.91	114.8	164	1.66	28.5	16	21	211	IR
5	19	98	1	s176	16.33	100	160	2.18	39.6	14.9	24	212	IR
5	20	99	1	s369	16.1	104.4	161	2.37	33.7	14.9	27	215	IR
5	21	100	1	s314	19.65	133	159	2.42	30.7	14.9	21	206	IR
6	2	101	1	s105	21.48	103.667	158	0.65	30.4	15.1	22	208	IR
6	3	102	1	s365	17.79	119.4	155	4.4	38.7	15	25	209	IR
6	4	103	1	s363	16.87	111.4	158	3.71	38.7	14.7	23	210	IR
6	5	104	1	s374	18.75	120.2	161	2.83	36.5	13.6	21	209	IR
6	6	105	1	s418	15.28	117.8	159	3.99	39.6	15.8	20	208	IR
6	7	106	1	s166	14.8	123.6	161	2.19	34	15.6	22	211	IR
6	8	107	1	s113	22.62	119.2	155	3.26	30.1	14.9	23	207	IR
6	9	108	1	Filler	18.88	120	159	3.46	36.8	14.9	24	211	IR
6	10	109	1	s393	16.17	107.6	158	3.5	32.6	14.6	26	210	IR
6	11	110	1	s138	21.78	120.2	154	4.17	35	14.5	22	208	IR
6	12	111	1	s97	19.1	126	157	5.04	31.8	14.1	20	207	IR
6	13	112	1	s334	30.14	124.6	157	3.66	27	13.8	24	208	IR
6	14	113	1	s286	*	*	*	*	29.3	12.3	*	*	IR
6	15	114	1	s309	19.36	113.2	157	5.72	35.7	14.3	20	209	IR
6	16	115	1	s333	21.99	137	156	4.26	26.9	16.5	26	207	IR
6	17	116	1	s148	18.4	133.6	160	2.28	28.9	15.1	25	211	IR
6	18	117	1	s109	18.7	102.8	161	1.55	36.2	16	20	210	IR
6	19	118	1	s392	16.21	114.8	161	2.62	32.5	14.6	25	212	IR
6	20	119	1	s292	19.61	77.6	155	0.82	28.7	15.8	25	206	IR
6	21	120	1	s184	16.02	105.333	170	0.76	33.6	15.2	15	212	IR
7	2	121	1	s301	17.17	138.2	164	2.52	27.2	15.1	21	207	IR
7	3	122	1	s376	16.11	95.8	157	3.2	33.5	15.4	24	211	IR
7	4	123	1	s324	19.81	96	152	2.99	28.3	15.2	15	198	IR
7	5	124	1	s397	19.37	114.2	156	3.4	33.5	14.9	22	207	IR
7	6	125	1	Filler	18.49	106.6	159	3.66	36.9	15	23	211	IR
7	7	126	1	s8	20.56	100.6	157	2.46	30.9	15.5	19	203	IR
7	8	127	1	s129	20.71	101.8	157	2.5	35.3	14.9	23	211	IR
7	9	128	1	s30	28.1	119.4	160	2.57	28.5	14.5	21	210	IR
7	10	129	1	s348	18.36	90.2	151	3.31	30	14.8	19	198	IR
7	11	130	1	s321	21.06	120.2	158	3.48	29	14.9	22	208	IR
7	12	131	1	s157	20.03	107.2	160	3.21	31.8	14.6	26	212	IR
7	13	132	1	s53	17.46	131.2	163	3.72	29.9	14.6	23	212	IR
7	14	133	1	s265	18.09	79.6	151	1.24	31.1	15.4	13	201	IR
7	15	134	1	s385	15.24	132.4	159	3.79	33.5	14.7	21	205	IR
7	16	135	1	s229	24.22	102.6	153	3.34	30.2	14.3	17	204	IR
7	17	136	1	s194	18.81	96.4	158	3.47	36	14.9	22	212	IR
7	18	137	1	s283	18.75	*	*	0.05	35.6	15.3	*	*	IR
7	19	138	1	s41	16.26	114.4	163	4.56	31.9	13.8	25	214	IR
7	20	139	1	s320	16.94	75.6	152	1.42	31.3	15.2	17	193	IR
7	21	140	1	s402	19.99	107	162	3.36	29.6	14.1	24	214	IR
8	2	141	1	Filler	17.91	110.2	160	2.26	36.9	15.9	24	212	IR
8	3	142	1	s52	17.64	122.4	160	3.91	31.9	15.3	25	210	IR
8	4	143	1	s180	27.27	113.6	161	4.05	26.7	13.5	18	208	IR
8	5	144	1	s255	21.37	73.8	152	1.22	30.4	15.5	16	195	IR
8	6	145	1	s74	21.45	97.4	159	3.16	36	14.9	21	212	IR
8	7	146	1	s141	19.69	91.2	159	1.79	36.4	15.6	21	215	IR
8	8	147	1	s256	19.33	74.4	153	1.51	28.8	16.1	17	200	IR
8	9	148	1	s426	17.64	96.8	160	2.53	40	15.1	22	211	IR
8	10	149	1	s403	14.66	129.4	161	2.53	33.4	15	25	213	IR
8	11	150	1	Filler	19.03	117.8	159	4.05	37.7	15.8	22	208	IR
8	12	151	1	s420	21.96	99.4	160	3.79	31.7	16.2	20	210	IR
8	13	152	1	s291	30.48	87.8	157	0.99	28.2	14.5	21	211	IR
8	14	153	1	s199	16.59	83.4	157	2.97	35	16.8	22	207	IR
8	15	154	1	s34	19.18	113.6	157	3.59	28.5	14.5	19	203	IR
8	16	155	1	s192	15.87	119	158	4.05	43.1	15	22	208	IR
8	17	156	1	s54	19.31	100	160	0.35	32.2	14.4	20	206	IR
8	18	157	1	s186	17.54	115	161	1.65	31.2	14.5	23	212	IR
8	19	158	1	s245	18.44	89	158	1.55	29.7	16	22	206	IR
8	20	159	1	s144	17.49	103.2	164	2.47	29.2	15.1	21	211	IR
8	21	160	1	s383	18.77	102	158	3.62	32.3	15.2	25	212	IR
9	2	161	1	s325	23	104.6	154	2.75	26.4	15.3	22	208	IR
9	3	162	1	s323	25.67	108.6	155	2.86	29.6	14.6	23	206	IR
9	4	163	1	Filler	18.36	119.8	159	4.55	36.6	16	24	212	IR
9	5	164	1	s281	18.6	*	*	0.14	30.7	15.5	*	*	IR
9	6	165	1	s339	18.71	112.8	158	3.82	29.8	15.8	26	208	IR
9	7	166	1	s211	19.88	126.6	163	3.72	27.8	14.6	20	208	IR
9	8	167	1	s373	19.67	56	175	0.12	31.4	14.9	10	221	IR
9	9	168	1	s341	*	*	*	*	*	*	*	*	IR
9	10	169	1	s124	20.72	100.2	156	3.35	31	14.7	18	207	IR
9	11	170	1	s251	17.2	115.2	157	3.13	29.5	15.4	27	211	IR
9	12	171	1	s210	12.87	139.6	162	3.42	30.5	16	20	210	IR
9	13	172	1	s135	19.3	118.4	160	3.97	31.2	14.7	24	211	IR
9	14	173	1	s204	30.49	104.4	159	3.58	30.4	14.6	21	212	IR
9	15	174	1	s316	19.23	107.6	160	3.29	29.9	14.7	21	205	IR
9	16	175	1	s432	18.21	118	159	3.99	38.3	15.3	23	212	IR
9	17	176	1	s228	19.34	107.2	159	1.88	30.8	14.7	22	206	IR
9	18	177	1	s282	19.73	114	157	2.53	33.8	15.1	20	208	IR
9	19	178	1	s64	19.52	103.6	158	3.22	35	14.4	20	212	IR
9	20	179	1	s143	18.72	105.4	160	3	30.9	14.4	26	212	IR
9	21	180	1	s347	18.59	69.4	154	1.66	31	15	16	201	IR
10	2	181	1	s38	19.55	*	*	0.06	25.1	15.6	*	*	IR
10	3	182	1	s57	18.39	106.4	161	3.32	34.9	15.5	23	214	IR
10	4	183	1	s185	25.66	104.2	157	3.96	26.7	14.2	23	210	IR
10	5	184	1	s298	19.92	131.4	163	3.41	28.1	15.1	25	215	IR
10	6	185	1	s130	16.6	108.6	159	3.37	40.4	15.3	21	210	IR
10	7	186	1	s146	15.45	126.4	162	3.65	31.3	14.7	23	211	IR
10	8	187	1	s106	22.67	96.6	158	1.5	30.5	14.7	23	211	IR
10	9	188	1	s274	16.62	122.8	167	2.8	29.1	15	15	212	IR
10	10	189	1	s395	17.82	116.4	157	4	33.9	15.8	25	210	IR
10	11	190	1	s170	19.6	113	160	0.14	32.1	15.5	23	212	IR
10	12	191	1	s127	21.62	103.8	157	4.57	33	16	25	211	IR
10	13	192	1	s266	20.36	87	155	1.58	30.3	14.8	18	205	IR
10	14	193	1	s96	21.84	109.8	158	4.38	32.5	15.1	20	207	IR
10	15	194	1	s278	18.86	127.2	160	3.11	29.6	15.4	22	208	IR
10	16	195	1	s173	13.86	94.4	157	3.33	40.6	15.8	23	208	IR
10	17	196	1	s330	18.68	*	*	0.11	29.9	14.6	*	*	IR
10	18	197	1	s260	20.9	89	153	1.82	32.8	15.1	20	208	IR
10	19	198	1	s405	16.65	120.8	162	3.73	30.1	15.1	26	212	IR
10	20	199	1	s178	19.83	97.75	166	0.63	30.6	14.2	19	214	IR
10	21	200	1	s254	17.34	76.8	152	1.54	30.6	16.4	15	201	IR
11	2	201	1	s366	17.49	98.8	158	1.93	39.4	14.5	23	212	IR
11	3	202	1	s243	23.09	87.2	156	2.54	32.1	15.3	22	205	IR
11	4	203	1	s198	21.06	94.6	160	2.6	31.8	15.7	25	213	IR
11	5	204	1	s128	16.37	97.8	160	2.79	30.9	15.4	26	212	IR
11	6	205	1	s261	22.42	70.6	153	0.52	26.8	15.7	11	196	IR
11	7	206	1	s82	19.48	76.8	163	2.41	40.3	14.7	18	214	IR
11	8	207	1	s396	18.59	107.4	159	4.04	35.2	15	22	212	IR
11	9	208	1	s407	22.56	91	160	2.41	33.6	14.5	20	212	IR
11	10	209	1	s220	18.95	100.4	155	2.7	28.1	15.8	21	205	IR
11	11	210	1	s66	20.52	103.2	155	4.43	32.8	14	23	207	IR
11	12	211	1	s60	15.51	95.4	161	2.11	40.4	15.5	25	211	IR
11	13	212	1	s340	21.93	119	159	4.42	29.1	13.8	22	208	IR
11	14	213	1	s235	18.98	96	160	2.76	31.1	14.6	20	208	IR
11	15	214	1	s328	19.26	103.8	152	2.29	26.7	15.1	17	195	IR
11	16	215	1	s295	22.55	109.4	160	2.72	28.9	14.6	21	210	IR
11	17	216	1	s322	20.73	114.6	155	3.01	33.9	14.8	22	215	IR
11	18	217	1	s267	19.24	80	155	1.5	26.1	14.8	21	205	IR
11	19	218	1	s94	17.59	91.4	157	4.4	32	15.2	23	206	IR
11	20	219	1	s214	18.86	95.4	154	1.13	30.3	16.4	24	206	IR
11	21	220	1	s31	24.33	89.2	156	2.3	29.7	15.4	25	213	IR
12	2	221	1	Filler	19.06	106	160	2.64	36.3	15.8	22	212	IR
12	3	222	1	s248	25.82	87.6	158	1.15	30.5	14.9	20	204	IR
12	4	223	1	s246	18.24	89.2	156	2.66	31.3	15.2	23	205	IR
12	5	224	1	s133	21.26	95.8	159	3.9	36.5	14.8	21	211	IR
12	6	225	1	s370	14.62	*	*	*	28.2	15.2	*	*	IR
12	7	226	1	s378	20.16	102.4	158	5.05	33.2	15.4	26	211	IR
12	8	227	1	s297	21.95	164	171	2.75	28.4	14.1	17	214	IR
12	9	228	1	s200	22.99	93	159	1.83	31.5	15.5	21	212	IR
12	10	229	1	s307	21.11	86.8	157	2.21	30.7	14.4	21	206	IR
12	11	230	1	s179	20.54	77	160	3.73	28.8	13.6	18	207	IR
12	12	231	1	s219	20.05	96.8	162	2.61	31.8	15	19	211	IR
12	13	232	1	s410	15.45	135.8	171	3.85	30.1	14.8	14	213	IR
12	14	233	1	s215	19.05	108.8	157	3.08	29.9	14.3	31	208	IR
12	15	234	1	s49	18.53	123.2	158	4.3	28.8	14.9	22	203	IR
12	16	235	1	s154	20.09	113.8	159	5.16	29	15.3	20	208	IR
12	17	236	1	s197	20.39	101.8	160	1.4	33.1	13.9	21	214	IR
12	18	237	1	s358	16.5	104.8	160	3.18	37	15.4	24	211	IR
12	19	238	1	s118	18.77	97	158	2.1	31.2	15.4	24	207	IR
12	20	239	1	Filler	18.15	103.8	160	3.61	36.3	15.5	20	212	IR
12	21	240	1	s108	22.98	106.8	155	3.44	36.6	14.9	28	212	IR
13	2	241	1	s422	17.14	109	156	1.94	31.6	14.3	21	204	IR
13	3	242	1	s364	24.21	118.2	157	3.77	35.2	14.9	25	215	IR
13	4	243	1	s379	16.36	111.6	157	4.09	32.4	15.5	25	212	IR
13	5	244	1	s188	22.48	124.4	160	2.26	30.7	15.9	21	208	IR
13	6	245	1	s368	17.73	108.8	160	4.31	35.6	15	24	214	IR
13	7	246	1	s285	18.66	104	163	0.38	36.1	15.2	18	209	IR
13	8	247	1	s332	22.32	97.8	156	3.82	32.3	15.5	24	208	IR
13	9	248	1	s18	18.85	*	*	*	34	13.2	*	*	IR
13	10	249	1	Filler	18.79	110	159	3.88	36.5	15.5	23	212	IR
13	11	250	1	s362	23.19	147.6	154	3.62	33.2	14.7	26	206	IR
13	12	251	1	s357	17.32	130	154	4.1	33.5	14.7	24	205	IR
13	13	252	1	s356	17.68	128.8	160	3.64	38.5	14.7	22	208	IR
13	14	253	1	s427	18.01	108.6	160	3.79	33.7	14.9	21	208	IR
13	15	254	1	s289	17.92	84	171	0.1	27.6	15.2	17	207	IR
13	16	255	1	s163	16.29	136	165	2.86	30.5	15.6	23	214	IR
13	17	256	1	s353	18.03	88.6	153	1.98	31.5	14.1	21	197	IR
13	18	257	1	s269	18.17	78.8	154	1.11	28.3	15.5	20	208	IR
13	19	258	1	s234	19.17	109	159	2.45	27.5	14.8	22	211	IR
13	20	259	1	s377	17.48	110.2	157	3.24	32.5	15.9	23	211	IR
13	21	260	1	Filler	18.28	121.4	159	3.59	37.5	14.9	22	*	IR
14	2	261	1	s355	18.47	116.2	156	3.26	34.1	15.3	21	206	IR
14	3	262	1	s162	17.46	112	157	3.19	32.1	15.6	24	208	IR
14	4	263	1	s167	16.16	103.6	158	2.11	39.6	17.7	24	208	IR
14	5	264	1	s136	17.74	109.4	161	3.62	35.6	15.5	21	214	IR
14	6	265	1	s419	17.24	*	*	*	35.9	14.3	*	*	IR
14	7	266	1	s262	15.42	85.6	154	1.45	32.6	16.1	20	196	IR
14	8	267	1	s55	18.51	114	160	3.62	32.2	15.2	25	210	IR
14	9	268	1	s98	18.51	123.6	160	2.57	32.3	14.8	22	207	IR
14	10	269	1	s406	16.21	137.6	159	3.47	32.5	14.7	26	211	IR
14	11	270	1	s95	17.87	118.2	157	4.6	32.6	15.1	23	205	IR
14	12	271	1	s195	20.31	97	160	2.19	37.1	14.5	22	212	IR
14	13	272	1	s398	19.37	140.6	158	2.93	30.6	14.9	25	212	IR
14	14	273	1	s61	21.98	111.6	154	2.89	31.8	14.7	26	206	IR
14	15	274	1	s249	20.14	104.6	153	1.95	31.8	14.8	18	198	IR
14	16	275	1	s318	14.49	*	184	*	32.2	15.7	18	221	IR
14	17	276	1	s408	18.59	109.2	160	2.54	33.2	16.1	22	212	IR
14	18	277	1	s236	16.53	*	*	*	31.6	14.9	*	*	IR
14	19	278	1	s126	34.29	81.6	159	1.17	26.8	15.4	22	215	IR
14	20	279	1	s164	19.21	105.4	158	3.21	33.9	15.2	22	210	IR
14	21	280	1	s344	19.72	110.4	157	3.98	34.8	15.1	23	208	IR
15	2	281	1	s241	22.65	105.8	157	1.63	27.2	14.6	24	208	IR
15	3	282	1	s159	17.41	110.8	159	1.92	36.1	17	22	207	IR
15	4	283	1	s65	22.76	119.4	157	3.22	32.2	14.7	21	211	IR
15	5	284	1	s335	20.41	114.2	153	3.55	29.7	14.2	25	206	IR
15	6	285	1	s84	19.33	88.8	160	2.22	37.8	14.7	20	212	IR
15	7	286	1	s121	16.1	91.2	155	2.37	33.1	15.4	24	206	IR
15	8	287	1	s327	22.16	110.6	156	2.15	28.3	15.2	23	210	IR
15	9	288	1	s5	16.68	130.6	165	1.52	33.1	15	21	211	IR
15	10	289	1	s382	17.92	133.4	159	3.51	30.1	14.6	23	212	IR
15	11	290	1	s88	18.65	106	160	4.73	34	15.1	22	214	IR
15	12	291	1	s125	23.69	128.2	159	2.77	31.7	15	21	211	IR
15	13	292	1	Filler	18.5	120.6	159	4.09	36.8	15.1	23	212	IR
15	14	293	1	s391	19.21	114	160	3.6	32.5	15.5	22	210	IR
15	15	294	1	s165	24.31	124.8	160	3.71	29.2	14.6	22	212	IR
15	16	295	1	s92	17.35	112.4	160	3.46	34.3	15.2	18	208	IR
15	17	296	1	s302	20.84	106.8	158	2.69	27.7	14.3	24	207	IR
15	18	297	1	s114	26.67	107	155	3.29	28.2	14.3	25	208	IR
15	19	298	1	s86	21.42	112.8	155	3.39	29.4	14.6	21	207	IR
15	20	299	1	s232	14.16	105.2	160	2.25	30.5	15.8	21	212	IR
15	21	300	1	s331	*	*	*	*	*	*	*	*	IR
16	2	301	1	s142	19.2	107.4	160	2.65	32.3	16	25	215	IR
16	3	302	1	s183	16.44	120.2	160	3.06	32	16.3	22	211	IR
16	4	303	1	s315	21.28	117.6	161	2.87	30.5	15.3	20	211	IR
16	5	304	1	s354	20.35	113	155	3.94	33.4	14.3	23	206	IR
16	6	305	1	s342	20.54	106.4	160	4.05	29.6	15.2	21	211	IR
16	7	306	1	s433	18.32	106.4	158	4.44	36.1	15.1	22	208	IR
16	8	307	1	s151	23.89	96	159	4.47	29.7	16.1	23	212	IR
16	9	308	1	s213	20.61	86	163	0.22	33.8	16.8	22	213	IR
16	10	309	1	s387	18.08	102.6	159	4.37	32.3	15.5	23	208	IR
16	11	310	1	s431	15.96	108.2	158	3.36	41.1	16.2	23	211	IR
16	12	311	1	s78	20.83	102.2	158	2.97	33.4	14.8	21	207	IR
16	13	312	1	s80	19.63	101	157	4.11	35.4	14.3	23	208	IR
16	14	313	1	s244	22.5	106.6	158	2.55	31.9	14.8	21	211	IR
16	15	314	1	s237	17.53	106.8	159	3.28	31.2	15.2	22	208	IR
16	16	315	1	s421	20.85	93.8	153	2.95	28.3	15.9	26	207	IR
16	17	316	1	s288	19.52	75.2	153	1.32	25.3	15.9	16	203	IR
16	18	317	1	s223	*	*	*	*	*	*	*	*	IR
16	19	318	1	s384	22.41	102.6	158	0.16	30.6	14.4	24	212	IR
16	20	319	1	s400	18.14	103.2	160	0.43	29.4	15.6	28	214	IR
16	21	320	1	s73	*	*	*	*	*	*	*	*	IR
17	2	321	1	s56	19.21	121.2	160	2.27	30.5	15.6	21	208	IR
17	3	322	1	s103	18.31	83.8	155	1.27	29.9	15.5	19	195	IR
17	4	323	1	s276	20.1	118.4	158	4.69	27	14.3	23	208	IR
17	5	324	1	s305	24.19	104	155	3.67	28.5	15	26	206	IR
17	6	325	1	s107	27.52	85.6	159	1.67	31.5	14.5	19	210	IR
17	7	326	1	s351	18.5	105.8	154	3.02	32.1	15.5	21	206	IR
17	8	327	1	s153	20.24	146	161	4.05	27.3	15.8	23	212	IR
17	9	328	1	s147	18.75	137.8	162	3.25	30.9	15.5	22	211	IR
17	10	329	1	s221	23.38	110.6	160	3.78	32.1	14.4	22	212	IR
17	11	330	1	s371	17.01	119	160	5.36	31.3	14.8	28	216	IR
17	12	331	1	s226	18.7	*	*	*	34.7	14.3	*	*	IR
17	13	332	1	s81	19.52	87.2	160	4.74	39	15.2	21	216	IR
17	14	333	1	s47	18.95	116.2	162	3.78	30.1	14.1	26	215	IR
17	15	334	1	s45	24.56	108.4	158	4.12	28.2	14.7	22	212	IR
17	16	335	1	s150	17.57	102.2	160	3.27	33.8	16.2	25	214	IR
17	17	336	1	s120	28.71	85	156	1.72	27.8	14.8	22	205	IR
17	18	337	1	s253	19.19	85.6	154	0.94	32.4	15.9	25	206	IR
17	19	338	1	s111	13.4	89.4	158	2.46	33.8	17.3	22	208	IR
17	20	339	1	s72	17.73	98.4	155	1.79	36.1	15.6	25	215	IR
17	21	340	1	s104	*	*	*	*	*	*	*	*	IR
18	2	341	1	s230	18.03	106.2	160	2.58	29.3	16.3	22	209	IR
18	3	342	1	s414	19.48	107.4	154	3.95	32.2	16.1	22	203	IR
18	4	343	1	s181	15.57	106.6	160	2.9	32.6	15.3	21	210	IR
18	5	344	1	s233	20.66	104.4	159	2.84	29	14.8	19	208	IR
18	6	345	1	s115	23.58	104.8	157	3.72	33.4	15.3	23	208	IR
18	7	346	1	s19	26.09	116	159	4.5	27.3	14	21	211	IR
18	8	347	1	s430	14.86	123.4	158	4.42	37.2	15.5	23	210	IR
18	9	348	1	s294	19.59	94.2	153	2.76	28.1	15.1	19	204	IR
18	10	349	1	s428	20.18	130	157	5.28	32.3	14.4	24	210	IR
18	11	350	1	s429	19.16	112.4	157	4.06	34	15	24	208	IR
18	12	351	1	s240	22.63	116.2	156	3.78	28.4	14.8	23	211	IR
18	13	352	1	s277	*	*	*	*	*	*	*	*	IR
18	14	353	1	s399	14.03	110.8	160	4.06	33.4	15.2	25	211	IR
18	15	354	1	s161	25.46	103	160	3.65	28.5	14.1	21	212	IR
18	16	355	1	s319	15.23	95.4	155	3.09	27.6	16.2	24	204	IR
18	17	356	1	s175	15.56	99	160	2.75	40	16.2	22	212	IR
18	18	357	1	s117	24.18	99.4	158	2.18	31.5	15.6	23	212	IR
18	19	358	1	s212	18.97	100.2	162	2.26	27.8	15.4	20	215	IR
18	20	359	1	s79	20.66	81	157	2.41	33.9	17.2	21	216	IR
18	21	360	1	s139	17.06	108.4	160	4.88	31.2	15.4	28	217	IR
19	2	361	1	s299	23.55	102	158	2.32	30.6	15.6	22	211	IR
19	3	362	1	s336	27.19	113.6	157	6.4	28.3	14.8	23	210	IR
19	4	363	1	s296	17.95	144.4	168	2.5	30.8	16	20	215	IR
19	5	364	1	s412	15.61	116.8	159	5.26	32.5	15.4	22	209	IR
19	6	365	1	s225	25.47	*	*	0.15	31.6	14.7	*	*	IR
19	7	366	1	s172	15.66	113.8	157	3.87	38.9	17.2	23	208	IR
19	8	367	1	s273	25.79	140.6	158	5.04	25.2	14.1	22	207	IR
19	9	368	1	s155	20.37	125.2	158	2.74	33	16	22	208	IR
19	10	369	1	s158	20.04	138	161	3.79	29.1	14.5	22	207	IR
19	11	370	1	s123	22.8	115.6	157	3.79	33.5	16	21	208	IR
19	12	371	1	s388	19.89	123	157	5.87	36.6	15.3	24	212	IR
19	13	372	1	s91	19	108.4	156	3.81	33.3	15.2	21	211	IR
19	14	373	1	s313	27.11	111.2	157	2.58	25.6	13.7	21	206	IR
19	15	374	1	s417	15.31	103.8	158	2.45	38.4	16.8	22	208	IR
19	16	375	1	s224	15.97	117	161	4.08	28.2	15.2	19	205	IR
19	17	376	1	s63	17.79	99.4	156	2.81	36.6	15.4	22	208	IR
19	18	377	1	s250	19.37	70	159	1.28	31.2	14.9	22	206	IR
19	19	378	1	s413	23.09	103.8	158	3.59	37.1	15.4	23	212	IR
19	20	379	1	s222	22.23	101.8	158	1.84	30.6	15.3	23	208	IR
19	21	380	1	s264	17.04	82.6	152	2.28	31.8	16.7	15	203	IR
20	2	381	1	s99	26.5	112.2	159	2.46	26.8	15.1	22	211	IR
20	3	382	1	s312	24.1	136.2	159	3.44	27.5	15.2	27	212	IR
20	4	383	1	s119	18.67	96.6	159	4.24	33.2	15.4	22	212	IR
20	5	384	1	s145	15.92	106.6	162	3.81	31.5	14.8	26	213	IR
20	6	385	1	s359	20.19	118.6	154	5.71	31.6	15.4	20	202	IR
20	7	386	1	s416	15.46	98.5	158	0.2	37.8	18.2	22	207	IR
20	8	387	1	s343	22.87	98	151	3.85	29.3	14.7	19	203	IR
20	9	388	1	s257	22.9	94	153	2.17	29.3	15.3	18	201	IR
20	10	389	1	s311	16.27	107.6	161	4.61	34.9	16.2	24	208	IR
20	11	390	1	s360	17.84	112.6	155	4.88	33.4	15.9	23	207	IR
20	12	391	1	s350	19.4	95	152	3.21	29.5	15.3	19	202	IR
20	13	392	1	s326	21.08	112.2	155	3.14	29.3	15.2	24	206	IR
20	14	393	1	s110	19.99	96.2	151	2.88	30.1	14.9	19	203	IR
20	15	394	1	s415	20.05	115.8	156	2.89	37	16	25	208	IR
20	16	395	1	s404	19.63	138.6	161	4.14	30.6	15.4	25	212	IR
20	17	396	1	s308	21.61	77.8	156	1.69	30.9	15.5	22	204	IR
20	18	397	1	s190	19.26	95.4	160	1.92	36.1	15.8	22	213	IR
20	19	398	1	s196	19.73	97	157	3.11	36	16.7	23	212	IR
20	20	399	1	s386	19.33	131.6	169	2.56	29.2	15.4	19	217	IR
20	21	400	1	s137	21.15	123	160	4.02	31.2	14.9	28	215	IR
21	2	401	2	s428	18.42	117.4	160	4.08	31.3	14.8	22	207	IR
21	3	402	2	s394	17.86	120	160	3.37	32.4	16.9	24	211	IR
21	4	403	2	s402	19.94	132.4	161	4.49	30.2	14.6	25	213	IR
21	5	404	2	s30	28.15	131.2	159	3.85	27.3	17.1	21	208	IR
21	6	405	2	s399	14.12	122.8	160	4.58	32.9	16.1	25	208	IR
21	7	406	2	s60	12.66	96.8	162	2.25	42.7	18.8	24	212	IR
21	8	407	2	s204	28.74	104.2	156	4.44	30.6	15.8	24	212	IR
21	9	408	2	s211	20.1	134.6	161	3.4	28.5	14.4	21	207	IR
21	10	409	2	s251	17.09	95.2	155	2.92	28.9	15.4	27	208	IR
21	11	410	2	Filler	17.77	114.2	158	4.62	38	15.5	23	208	IR
21	12	411	2	s207	29.15	101.6	160	2.81	30.3	15.7	20	212	IR
21	13	412	2	s285	*	*	*	*	*	*	*	*	IR
21	14	413	2	s280	*	*	*	*	*	*	*	*	IR
21	15	414	2	s361	21.33	98.2	156	4.69	32.4	15.2	23	207	IR
21	16	415	2	Filler	18.56	113.8	158	4.67	37.3	16.2	24	208	IR
21	17	416	2	s78	20.13	91.4	156	2.18	33.2	15.9	27	209	IR
21	18	417	2	s129	20.5	101.8	155	2.94	34.9	15.8	26	211	IR
21	19	418	2	s178	18.6	117	167	0.62	31.8	14.7	19	215	IR
21	20	419	2	s398	17.86	128.2	156	3.37	29.7	15.7	28	215	IR
21	21	420	2	s333	21.64	130.4	155	3.47	27.8	16	26	206	IR
22	2	421	2	s56	20.77	129.6	159	3.77	29.1	16	23	212	IR
22	3	422	2	s241	23.95	98.6	158	1.59	28.2	16	23	206	IR
22	4	423	2	s163	15.48	142.2	167	3.36	30.8	15.2	21	215	IR
22	5	424	2	s416	16.35	87.4	159	3.47	37.8	18.3	23	212	IR
22	6	425	2	s351	16.73	94.8	156	3.35	31.9	15.6	25	205	IR
22	7	426	2	s145	18.38	103	166	2.93	31.2	14.8	22	215	IR
22	8	427	2	s98	19.1	118.2	160	3.3	30.8	15.2	25	212	IR
22	9	428	2	s131	19.23	110	155	4.07	34.7	14.9	23	208	IR
22	10	429	2	s271	30.29	115.2	156	4.17	25.5	14	25	208	IR
22	11	430	2	s69	21.27	115.6	156	4.01	32.5	15.2	25	207	IR
22	12	431	2	s364	22.69	116.8	156	4.86	36	14.6	25	208	IR
22	13	432	2	s325	21.001	104.4	154	2.23	25.7	15	20	202	IR
22	14	433	2	s366	17	107	158	2.82	40.2	15.2	23	212	IR
22	15	434	2	s238	18.51	112.8	163	3.71	28.4	15.2	25	215	IR
22	16	435	2	s303	17.71	102	162	2.66	32.9	16.1	20	211	IR
22	17	436	2	s95	19.2	100.4	156	4.41	32.4	14.6	26	208	IR
22	18	437	2	s255	21.31	77.4	153	0.7	27	17.8	16	195	IR
22	19	438	2	s50	20.98	117.2	160	3.92	27.2	14.9	25	208	IR
22	20	439	2	s357	17.97	113.6	153	3.73	32	16.4	24	207	IR
22	21	440	2	s275	24.27	107.2	157	3.33	25.7	13.7	23	208	IR
23	2	441	2	s373	*	*	*	*	*	*	*	*	IR
23	3	442	2	s342	20.72	118.8	160	5.21	28.8	16.5	20	212	IR
23	4	443	2	s322	21.24	117.8	155	3.92	32.1	15.9	22	208	IR
23	5	444	2	s396	17.04	119	158	3.97	35.8	15.8	23	211	IR
23	6	445	2	s430	14.114	107	160	4.2	38.1	15.6	23	211	IR
23	7	446	2	s246	19.38	97.4	155	2.03	30.8	16.4	22	204	IR
23	8	447	2	s284	*	*	*	*	*	*	*	*	IR
23	9	448	2	s336	28.58	116.4	156	5.46	28.3	14.3	24	208	IR
23	10	449	2	s229	24.82	101.8	155	2.43	30.6	14.6	19	201	IR
23	11	450	2	s75	16.6	123.8	156	4.27	35.7	15.5	25	208	IR
23	12	451	2	s58	20.14	132.4	160	2.67	28.8	15.4	22	210	IR
23	13	452	2	s210	12.76	142.6	160	3.38	30.2	16	22	210	IR
23	14	453	2	s113	19.86	112.6	156	2.41	29.2	14.8	22	205	IR
23	15	454	2	s392	15.56	124.8	160	4.08	31.5	15.2	26	212	IR
23	16	455	2	s419	*	91	160	*	*	*	21	206	IR
23	17	456	2	s138	21.84	114	155	4.36	32.6	15.1	22	211	IR
23	18	457	2	s151	22.51	114.4	160	3.03	30.4	16	22	211	IR
23	19	458	2	Filler	17.83	111.4	160	2.75	37.7	14.4	22	212	IR
23	20	459	2	s180	28.09	118.2	161	4.01	26.1	14.3	20	208	IR
23	21	460	2	s244	23.36	111	156	3.11	30.6	15.8	22	209	IR
24	2	461	2	s314	19.54	104.6	162	2.99	28.9	15.3	20	206	IR
24	3	462	2	s374	17.79	107.2	162	5.2	34.8	15.3	22	212	IR
24	4	463	2	s79	19.4	95.6	161	3.09	35.3	16.5	19	212	IR
24	5	464	2	s323	25.57	116.8	156	3.8	29.4	14.6	25	208	IR
24	6	465	2	s149	17.83	131.6	158	3.73	30.1	15.6	23	210	IR
24	7	466	2	s190	17.45	106.8	160	3.62	38	16	21	212	IR
24	8	467	2	s71	17.46	115.2	156	2.72	38.3	15	24	207	IR
24	9	468	2	s154	21.48	125	157	4.26	28.8	15.3	23	208	IR
24	10	469	2	s272	29.12	116.6	156	4.79	26.5	13.6	23	207	IR
24	11	470	2	s370	*	*	*	*	*	*	*	212	IR
24	12	471	2	s81	19.73	82.4	165	4.49	40.3	14.9	17	216	IR
24	13	472	2	s389	16.62	114.2	156	4.04	33.6	15.9	26	211	IR
24	14	473	2	s225	*	*	*	*	*	*	*	*	IR
24	15	474	2	s367	17.99	124.2	155	4.64	35.6	14.5	31	215	IR
24	16	475	2	s51	19.97	114.4	161	3.16	30.4	14.6	23	210	IR
24	17	476	2	s191	17.72	107	160	2.74	36.8	15.5	21	213	IR
24	18	477	2	s41	15.39	118.4	160	4.19	30.8	14	26	215	IR
24	19	478	2	s289	*	70.5	160	*	*	*	19	206	IR
24	20	479	2	s306	29.5	123	158	3.62	26.5	15.8	23	207	IR
24	21	480	2	s384	17.47	113.2	156	3.16	30.6	14.6	26	208	IR
25	2	481	2	s311	13.92	99.8	163	3.01	32.3	15.8	22	212	IR
25	3	482	2	s422	17.15	107.2	160	2.92	31.1	14.9	19	210	IR
25	4	483	2	Filler	19.02	118	162	4.7	37.3	15.8	23	213	IR
25	5	484	2	s212	17.7	108.6	162	3.05	28.3	15.3	20	211	IR
25	6	485	2	s327	24.64	105	156	2.66	26.5	16.2	24	211	IR
25	7	486	2	s73	*	*	*	*	*	*	*	*	IR
25	8	487	2	s226	*	*	171	*	*	*	13	*	IR
25	9	488	2	s348	20.3	94.8	152	2.79	29	14.7	22	203	IR
25	10	489	2	s405	16.31	130.6	160	3.82	30.3	15	25	209	IR
25	11	490	2	s134	18.18	97.2	159	3.55	34.7	15.3	24	211	IR
25	12	491	2	s268	26.57	107.2	156	3.38	30	14.6	25	210	IR
25	13	492	2	s88	19.25	103.2	162	4.6	34.3	15.1	23	215	IR
25	14	493	2	s197	18.36	106.2	164	2.49	32.5	14.5	21	213	IR
25	15	494	2	s165	25.92	126.4	156	3.53	30.7	13.8	25	208	IR
25	16	495	2	s12	22.09	101.2	160	3.92	29.6	15.2	22	212	IR
25	17	496	2	s413	19.78	118.4	156	4	36.3	15	25	211	IR
25	18	497	2	s133	20.74	96.4	158	3.57	36	14.6	21	211	IR
25	19	498	2	s136	17.65	91.4	162	2.05	34	15	20	212	IR
25	20	499	2	s423	17.89	85.4	152	1.11	25.3	17	16	195	IR
25	21	500	2	s406	17.13	127	160	2.69	30.6	15.6	26	215	IR
26	2	501	2	s344	18.96	113	156	4.54	33.6	15.6	24	210	IR
26	3	502	2	s294	19.66	91.6	156	2.78	28.1	15.9	21	205	IR
26	4	503	2	s109	20.41	107	160	2.62	33.6	16	24	212	IR
26	5	504	2	s49	18.25	119.8	162	4.31	29.2	15.1	22	206	IR
26	6	505	2	s169	19.6	109.2	158	3.04	32.5	15.4	23	210	IR
26	7	506	2	s253	18.55	86.6	156	1.93	31.4	15.6	22	205	IR
26	8	507	2	s365	17.72	114	157	3.79	39.2	14.9	23	209	IR
26	9	508	2	s80	19.17	110.2	156	2.5	34.1	14.6	22	208	IR
26	10	509	2	s355	17.57	116	156	4.6	34.8	14.5	21	211	IR
26	11	510	2	s385	15.46	140	156	4.03	33.4	14.8	25	207	IR
26	12	511	2	s195	19.31	92.8	162	1.56	36.6	14.9	21	214	IR
26	13	512	2	s359	19.83	113.2	153	4.05	32.6	15.1	21	205	IR
26	14	513	2	s411	23.34	117.2	154	4.17	34.9	14.3	23	211	IR
26	15	514	2	s198	21.18	101.2	161	2.24	30.2	15.8	24	212	IR
26	16	515	2	s379	17.11	112.8	157	4.05	33.3	15.7	25	210	IR
26	17	516	2	s425	15.52	99.8	158	3.53	41	14.7	23	210	IR
26	18	517	2	s391	16.54	109.4	158	3.43	35.9	14.6	21	211	IR
26	19	518	2	s53	16.17	119.8	163	3.95	29.3	15	25	215	IR
26	20	519	2	s70	18.65	103.4	155	4.39	37	15.3	24	209	IR
26	21	520	2	s276	20.05	103.4	158	3.73	26.5	14.3	24	209	IR
27	2	521	2	s155	20.49	114	157	2.9	32.3	15.8	24	212	IR
27	3	522	2	s433	17.97	112.4	157	4.57	33.6	15.6	21	208	IR
27	4	523	2	s205	26.42	109.4	157	4.26	27.6	14.5	22	208	IR
27	5	524	2	s110	18.74	105.2	153	2.92	31.5	15.2	23	204	IR
27	6	525	2	s135	19.92	116.2	160	3.91	29.6	14.6	25	211	IR
27	7	526	2	s128	17.2	117.2	158	3.24	30.7	16.1	27	210	IR
27	8	527	2	s354	20.74	122.2	155	4.45	33.9	14.3	23	206	IR
27	9	528	2	s132	19.02	117	156	3.91	37.3	14.2	22	209	IR
27	10	529	2	s99	25.87	129.2	156	3.57	29	15.6	25	212	IR
27	11	530	2	s93	17.78	121	158	4.79	34.6	14.7	21	208	IR
27	12	531	2	s148	17.64	145.4	160	3.92	28.7	15.3	25	212	IR
27	13	532	2	s296	17.67	140.6	168	2.29	30.3	15.6	20	216	IR
27	14	533	2	s31	23.5	102.8	158	2.7	30.9	14.4	22	212	IR
27	15	534	2	s19	25.06	111.4	157	4.32	30.3	13.9	24	211	IR
27	16	535	2	s310	15.78	109.4	158	3.45	32.2	15.4	22	203	IR
27	17	536	2	s248	24.91	93.2	155	1.65	30.1	14.2	23	205	IR
27	18	537	2	s220	18.45	102.2	156	2.47	27.7	16.2	18	203	IR
27	19	538	2	s256	19.77	78	153	1.33	27.9	15.9	18	198	IR
27	20	539	2	s320	17.98	92.8	152	1.8	29	16.2	14	196	IR
27	21	540	2	s403	15.43	137.2	160	3.74	32.1	14.8	26	215	IR
28	2	541	2	s94	18.54	109.4	157	4	32.1	15.2	24	208	IR
28	3	542	2	s74	20.66	114.2	156	2.54	35.5	14.8	22	208	IR
28	4	543	2	s194	18.02	106.4	157	4.83	36	15.5	22	207	IR
28	5	544	2	s179	20.83	84.8	160	3.91	29.9	15	20	207	IR
28	6	545	2	s158	28.6	126.2	165	2.64	28.7	14.2	20	208	IR
28	7	546	2	s347	20.09	92.6	155	2.56	29	15	14	196	IR
28	8	547	2	s393	14.79	114.8	158	3.38	33	14.9	27	211	IR
28	9	548	2	s345	18.92	119	155	4.48	35.4	14.6	21	206	IR
28	10	549	2	s166	14.56	113.8	162	2.51	34.4	15.1	22	211	IR
28	11	550	2	s174	16.48	97.8	161	3.93	34	16.4	24	212	IR
28	12	551	2	s250	17.02	82.4	161	2.03	30.6	15.5	16	203	IR
28	13	552	2	s432	19.16	113.2	161	3.25	36	15.8	23	213	IR
28	14	553	2	s382	18.86	136.4	158	3.12	29.4	14.7	27	212	IR
28	15	554	2	s105	*	103.333	160	*	*	*	18	207	IR
28	16	555	2	s161	26.23	122.8	160	5.17	28.1	15.3	21	210	IR
28	17	556	2	s316	19.73	112.4	156	3.17	29.3	14.8	23	203	IR
28	18	557	2	s431	13.82	109	159	2.34	42.6	17.8	22	211	IR
28	19	558	2	s298	20.63	138.2	162	3.98	27.7	15.4	23	212	IR
28	20	559	2	s185	24.47	108.8	155	3.78	26.4	14.1	25	208	IR
28	21	560	2	s173	13.86	92.2	156	2.74	40.1	16.3	24	207	IR
29	2	561	2	s186	18.25	113.6	163	1.66	29.9	15.3	23	214	IR
29	3	562	2	s260	19.87	92.8	156	2.77	31.3	16	22	205	IR
29	4	563	2	s119	19.32	97.4	161	3.56	32.4	16.2	23	212	IR
29	5	564	2	s235	17.87	96	162	3.12	30.8	15.5	20	211	IR
29	6	565	2	s259	20.07	84.4	159	2.88	32.5	16	21	210	IR
29	7	566	2	s358	16.91	130.4	161	4.97	38.6	15.8	19	208	IR
29	8	567	2	s170	*	*	*	*	*	*	*	*	IR
29	9	568	2	s350	21.51	93.6	153	2.1	27.7	15	18	200	IR
29	10	569	2	s426	17.15	117.6	159	3.58	41.8	13.7	22	212	IR
29	11	570	2	s315	21.81	111	161	3.27	29.7	15.9	21	212	IR
29	12	571	2	s293	18.77	99.4	155	2.46	28.4	15.9	22	203	IR
29	13	572	2	s139	17.02	116	162	3.16	30.9	14.4	26	217	IR
29	14	573	2	Filler	17.9	110.6	158	3.85	36.9	15.1	26	212	IR
29	15	574	2	s343	22.6	93.6	152	3.13	28.9	15.2	18	201	IR
29	16	575	2	s214	18.27	107	154	1.3	28.2	15.7	20	204	IR
29	17	576	2	s45	25.25	115	156	3.96	27.4	14.7	25	211	IR
29	18	577	2	s388	19.26	113	156	5.06	37	15.2	28	212	IR
29	19	578	2	s410	15.36	129.2	169	3.89	30.2	15.1	19	214	IR
29	20	579	2	s200	*	104.6	156	*	33	15	24	212	IR
29	21	580	2	s112	19.86	112.4	156	0.4	26.2	15.1	26	208	IR
30	2	581	2	s230	20.08	113.8	162	3.35	28.4	16.1	23	211	IR
30	3	582	2	s240	21.38	116.4	154	3.03	28.5	15.3	26	206	IR
30	4	583	2	s282	17.44	110	155	3.39	33.7	14.9	22	208	IR
30	5	584	2	s414	20.82	108.2	155	3.91	32.1	15.7	22	205	IR
30	6	585	2	s247	16.66	79.2	155	0.97	29.8	16.7	17	201	IR
30	7	586	2	s257	21.53	101.2	154	1.92	29.2	15.6	20	202	IR
30	8	587	2	s102	19.24	121.4	156	3.52	32.3	15.5	25	208	IR
30	9	588	2	s55	19.56	109.6	160	3.84	31.1	15	24	208	IR
30	10	589	2	s341	*	*	*	*	*	*	*	*	IR
30	11	590	2	s415	20.07	116.2	154	0.55	36.4	15.7	27	210	IR
30	12	591	2	s231	15.13	103.8	162	2.16	31	15.5	20	204	IR
30	13	592	2	s378	20.28	102.2	156	4.6	34	14.7	25	210	IR
30	14	593	2	s164	19.22	104	158	3.21	33.9	15.4	23	210	IR
30	15	594	2	s76	21.24	107.8	156	4.82	34.3	15.5	19	209	IR
30	16	595	2	s281	*	*	*	*	*	*	*	*	IR
30	17	596	2	s328	19.97	102.2	152	2.01	25.5	16.3	18	197	IR
30	18	597	2	s331	16.18	*	*	3.63	33.3	17.4	*	*	IR
30	19	598	2	s254	20.29	79.4	152	0.9	27.5	16.7	17	204	IR
30	20	599	2	s82	19.07	77.2	163	3.49	39.1	15.6	18	214	IR
30	21	600	2	s84	20.54	95.8	156	3.41	34.6	15	24	212	IR
31	2	601	2	s237	16.97	121.8	158	3.33	30.6	15.7	23	212	IR
31	3	602	2	s286	*	*	*	*	*	*	*	*	IR
31	4	603	2	s122	23.668	106.2	156	3.2	30.5	14.9	23	204	IR
31	5	604	2	s243	25.34	96.6	156	2.79	29.4	15.6	24	208	IR
31	6	605	2	s330	17.38	78.5	173	0.26	28.4	16.2	15	215	IR
31	7	606	2	s339	17.84	124.4	158	4.33	29.3	16.2	24	205	IR
31	8	607	2	s162	18.12	109.4	158	3.96	32	15.9	23	208	IR
31	9	608	2	s376	16.08	102.6	157	3.58	33.3	15.6	25	207	IR
31	10	609	2	s386	18.95	147.4	168	2.87	28.7	15.1	20	216	IR
31	11	610	2	s64	19.15	124.2	156	5.12	35.1	15.5	24	210	IR
31	12	611	2	s90	19.72	125	158	4.37	35.2	15.2	23	212	IR
31	13	612	2	s114	24.46	130.2	155	4.26	28.9	14.5	22	205	IR
31	14	613	2	s188	25.03	127.6	156	1.82	29.2	15.7	25	208	IR
31	15	614	2	s159	16.3	119.2	157	2.13	35.1	17.9	23	206	IR
31	16	615	2	s97	19.79	125.6	155	5.57	31.1	14.9	20	206	IR
31	17	616	2	s137	20.78	131.4	160	4.34	30.2	14.7	26	215	IR
31	18	617	2	s199	*	96	157	*	*	*	22	205	IR
31	19	618	2	s353	20.24	99.6	153	2.12	29.3	14.5	19	202	IR
31	20	619	2	s144	17.05	120.6	162	3.53	28.4	15.6	19	208	IR
31	21	620	2	s429	19.69	108.2	156	3.84	32.9	16.3	25	212	IR
32	2	621	2	s407	22.08	112	158	3.86	33.3	14.4	22	212	IR
32	3	622	2	s242	22.58	112.8	158	3.8	27	15.5	28	214	IR
32	4	623	2	s337	28.44	139	159	4.29	28.9	14.8	23	208	IR
32	5	624	2	s360	16.96	123.6	155	5.03	32.9	15.6	24	208	IR
32	6	625	2	s101	17.82	81.4	156	2.03	32.2	15.5	18	201	IR
32	7	626	2	s363	18	104	159	3.73	38.2	16	23	213	IR
32	8	627	2	s305	24.15	125.2	155	4.08	26.1	15.7	24	206	IR
32	9	628	2	s176	14.59	114.4	160	3.15	40.1	14.9	22	215	IR
32	10	629	2	s356	15.96	129.8	156	4.63	38.8	17	22	206	IR
32	11	630	2	s223	*	*	*	*	*	*	23	207	IR
32	12	631	2	s108	21.45	117	156	5.03	34.9	15.7	22	208	IR
32	13	632	2	s156	28.63	119.6	158	1.88	26.3	14	19	206	IR
32	14	633	2	s153	20.2	146.6	160	4.32	27.3	15.3	24	213	IR
32	15	634	2	s262	18.23	89.8	155	1.83	27.5	15.2	16	200	IR
32	16	635	2	s83	18.37	87.4	160	3.2	36.2	15.8	18	212	IR
32	17	636	2	s380	18.8	115	155	3.47	34.1	15.3	24	206	IR
32	18	637	2	s304	17.41	101.6	159	3.52	29.1	16.2	24	215	IR
32	19	638	2	s111	13.76	111.8	155	1.91	34	16.8	23	205	IR
32	20	639	2	s47	18.81	120.6	162	4.16	29.9	15.1	26	217	IR
32	21	640	2	s72	16.37	102.4	156	1.82	36.4	15.4	24	210	IR
33	2	641	2	s297	22.8	160	170	2.59	26.9	14.9	18	212	IR
33	3	642	2	s395	16.92	113	156	3.59	34.1	16.2	28	208	IR
33	4	643	2	s143	18.49	125.8	160	3.86	31	14.6	24	213	IR
33	5	644	2	s335	20.11	115.6	154	3.51	28.8	15.6	23	205	IR
33	6	645	2	s65	21.04	115.6	156	3.19	30.5	16.5	23	212	IR
33	7	646	2	Filler	18.07	114.2	160	4.1	35.6	16.2	23	212	IR
33	8	647	2	s324	21.05	103.2	155	2.08	27.3	16.5	19	203	IR
33	9	648	2	s175	14.98	115	160	2.89	40.8	15	21	210	IR
33	10	649	2	s368	17.52	127	156	4.27	36.2	14.2	25	208	IR
33	11	650	2	s125	25.47	125.2	156	2.94	30.8	16.3	22	208	IR
33	12	651	2	s377	16.75	117.8	156	3.68	34.6	16.4	24	207	IR
33	13	652	2	s264	17.84	83.8	154	1.67	31.2	16	19	200	IR
33	14	653	2	s318	*	82	168	*	*	*	20	215	IR
33	15	654	2	s383	19.11	113.8	156	4.65	32.3	16.6	27	212	IR
33	16	655	2	s417	13.98	106.8	156	3.65	38.4	16.7	24	208	IR
33	17	656	2	s157	21.82	112.4	160	2.19	30.5	15.3	25	215	IR
33	18	657	2	s270	24.9	106.8	156	4.6	26.5	14.8	22	208	IR
33	19	658	2	s329	16.87	90.2	154	1.49	28	15.7	20	198	IR
33	20	659	2	s372	14.39	105.2	156	4.79	34.8	17.1	29	214	IR
33	21	660	2	s77	18.69	103.2	156	2.78	35.1	16	25	211	IR
34	2	661	2	s404	18.95	135.4	160	3.39	31.2	14.9	26	212	IR
34	3	662	2	s390	14.35	123	162	3.6	34.8	15.9	26	214	IR
34	4	663	2	s312	24.53	143.6	157	3.37	29.1	15.6	29	212	IR
34	5	664	2	s309	19.04	108.6	157	4.21	35.1	15.1	21	208	IR
34	6	665	2	s236	*	48	168	*	*	*	14	204	IR
34	7	666	2	s66	20.57	115.8	155	4.55	33.1	16.6	23	208	IR
34	8	667	2	s408	19	114.2	161	3.16	33.7	15.4	21	210	IR
34	9	668	2	s228	20.54	128.6	156	2.98	31.1	14.2	24	207	IR
34	10	669	2	s87	19.18	116.6	156	4.04	34.2	14.4	24	208	IR
34	11	670	2	s375	14.2	106.4	157	3.5	33.8	15.5	25	207	IR
34	12	671	2	s299	23.15	105	155	2.14	30.3	15.2	24	208	IR
34	13	672	2	s115	24.86	105.2	156	5.14	28.1	14.3	24	211	IR
34	14	673	2	s290	*	*	*	*	*	*	*	*	IR
34	15	674	2	s160	19.83	119.2	162	3.3	32.4	15.6	23	214	IR
34	16	675	2	s57	17.09	109.2	162	4.24	33.1	15.1	20	212	IR
34	17	676	2	s63	16.5	102.6	156	2.32	35.4	14.5	19	207	IR
34	18	677	2	s196	18.94	100.6	155	2.93	34.4	14.3	22	208	IR
34	19	678	2	s273	25.88	121.4	160	3.07	25.8	14.2	21	211	IR
34	20	679	2	s300	19.14	135	162	2.93	27.8	15	23	211	IR
34	21	680	2	s123	21.03	103.8	156	2.43	34.7	16.2	26	209	IR
35	2	681	2	s92	16.23	122.8	159	3.18	34.4	15.2	20	205	IR
35	3	682	2	s142	16.52	119.2	160	3.81	32.2	16.4	25	212	IR
35	4	683	2	s326	20.9	130.2	155	2.73	28.5	16.7	25	205	IR
35	5	684	2	s106	22.43	112.2	160	2.4	30	14.5	22	212	IR
35	6	685	2	s215	20.11	119.4	156	4.67	31	15.5	25	211	IR
35	7	686	2	s147	16.94	146.2	162	3.49	31	15.3	23	211	IR
35	8	687	2	s288	19.29	83	156	1.47	24	15.9	14	201	IR
35	9	688	2	s239	20.94	128	156	2.72	32.8	14.9	25	208	IR
35	10	689	2	s278	19.08	130	159	2.78	29.3	15.4	22	206	IR
35	11	690	2	s332	22.8	115.8	156	4.34	32.6	15.5	23	207	IR
35	12	691	2	s100	*	79	160	*	*	*	19	204	IR
35	13	692	2	s387	18.57	106.6	157	4.25	33.3	15	25	208	IR
35	14	693	2	s420	21.45	113.4	156	3.3	32.8	14.9	24	212	IR
35	15	694	2	s292	18.41	109.4	156	2.18	27.4	15.8	24	204	IR
35	16	695	2	s424	23.33	131.4	154	4.36	29.4	15.2	22	206	IR
35	17	696	2	s307	19.72	107.8	153	1.85	28.7	14.9	20	200	IR
35	18	697	2	s421	19.11	109.6	154	2.02	28.3	15.3	26	204	IR
35	19	698	2	s313	28.97	114.8	156	2.31	26.1	14.6	21	205	IR
35	20	699	2	s252	20.8	99.4	155	3.75	33	15.3	25	208	IR
35	21	700	2	s91	18.88	105	155	3.73	32.5	15.1	24	208	IR
36	2	701	2	s182	17.14	123.4	164	2.92	32	15.5	18	213	IR
36	3	702	2	s409	17.87	120.2	156	3.25	37.4	15.3	24	209	IR
36	4	703	2	s397	17.73	127.8	154	3.79	34	15.2	27	206	IR
36	5	704	2	s308	19.41	91	159	2.06	31.6	15	18	201	IR
36	6	705	2	s184	14.96	112.6	166	1.3	33.5	15.4	19	214	IR
36	7	706	2	s317	21.77	120	166	3.51	27.4	15	20	214	IR
36	8	707	2	s234	19.13	113.6	156	2.43	27	14.1	24	204	IR
36	9	708	2	s279	20.29	143.8	160	2.5	31.2	14.3	25	212	IR
36	10	709	2	s245	18.98	97.6	158	1.93	28	15.3	21	205	IR
36	11	710	2	s369	16.61	126.2	158	3.31	33.7	14.8	28	215	IR
36	12	711	2	s86	19.93	121.8	153	3.11	30.1	14.7	22	205	IR
36	13	712	2	s121	18.93	97.4	157	2.52	30.3	15.1	22	205	IR
36	14	713	2	s274	17.45	136.6	167	2.65	29.5	14.7	19	215	IR
36	15	714	2	s224	16.76	128.4	158	3.28	28.3	14.7	20	204	IR
36	16	715	2	s400	18.39	131.8	158	4.15	28.5	15	27	214	IR
36	17	716	2	s183	17.86	136	160	1.8	30.7	14.3	22	210	IR
36	18	717	2	Filler	17.45	115.6	158	2.87	37	14.7	24	208	IR
36	19	718	2	s418	14.93	107.4	158	2.96	38.2	15.4	20	206	IR
36	20	719	2	s85	16.85	113	156	2.54	33.6	15.1	21	205	IR
36	21	720	2	s340	21.23	124.6	158	3.64	29	14.3	24	208	IR
37	2	721	2	s221	23.84	107.2	157	3.41	31.8	14	25	211	IR
37	3	722	2	s96	20.57	107.2	156	3.54	32	14.8	22	208	IR
37	4	723	2	s261	21.3	90.8	154	0.59	26.3	15.6	11	196	IR
37	5	724	2	s412	14.58	111.6	158	3.55	34.5	13.9	24	212	IR
37	6	725	2	s302	19.12	134.4	156	2.8	28.2	14.5	28	205	IR
37	7	726	2	s118	17.37	104.8	156	2.64	30.6	15.7	24	209	IR
37	8	727	2	s206	24.65	98	159	2.48	27.5	13.7	22	208	IR
37	9	728	2	s124	20.58	104.6	156	1.83	30.3	14.5	20	211	IR
37	10	729	2	s127	22.2	110.6	156	2.83	33.9	15.5	23	207	IR
37	11	730	2	s258	18.44	93	155	1.98	29.2	16.1	19	201	IR
37	12	731	2	s263	17.22	77.6	156	0.94	29.9	14.9	15	200	IR
37	13	732	2	s371	17.15	123.8	160	3.41	31.8	13.5	28	216	IR
37	14	733	2	s338	21.1	117.8	153	3.75	30.2	14.1	21	205	IR
37	15	734	2	s52	18.04	123.2	161	3.28	32.1	15.4	24	214	IR
37	16	735	2	s227	*	*	*	*	*	*	*	*	IR
37	17	736	2	s18	*	*	*	*	*	*	*	*	IR
37	18	737	2	s321	20.59	118.2	156	2.56	29	14.7	25	212	IR
37	19	738	2	s346	19.45	84.6	153	2.06	30.6	15.3	16	200	IR
37	20	739	2	s222	20.31	105.4	156	2.95	30.6	15.1	25	210	IR
37	21	740	2	s427	17.04	93.6	159	3.16	33.7	15.8	23	210	IR
38	2	741	2	s216	18.47	111.2	162	2.91	30.2	15.9	20	214	IR
38	3	742	2	s265	20.17	86.2	154	0.37	29.4	16.5	16	200	IR
38	4	743	2	s277	*	*	*	*	*	*	*	*	IR
38	5	744	2	s218	19.23	97.8	153	1.99	25.7	16.6	21	200	IR
38	6	745	2	s301	16.36	147.6	163	3.03	27.4	15.6	25	210	IR
38	7	746	2	s209	21.25	114.6	155	3.29	26.5	15.1	24	206	IR
38	8	747	2	s217	18.25	93.4	155	1.74	28.2	14.8	22	204	IR
38	9	748	2	s267	20.63	101.6	153	1.62	25.8	14.9	17	203	IR
38	10	749	2	s130	16.07	112.8	156	2.31	39.3	15.3	21	205	IR
38	11	750	2	s362	22.52	138.2	154	3.12	33.6	15	22	206	IR
38	12	751	2	s117	23.27	108.6	156	3.16	33.5	15.5	24	209	IR
38	13	752	2	s43	25.07	102.4	156	2.53	24.5	15.9	20	205	IR
38	14	753	2	s249	21.72	89	154	0.68	31	14	21	203	IR
38	15	754	2	s319	14.73	108.2	156	3.67	27.7	15.9	23	204	IR
38	16	755	2	s104	*	98.6	157	*	*	*	23	209	IR
38	17	756	2	s334	29.16	115.8	156	2.11	27.2	14.3	22	207	IR
38	18	757	2	s168	13.86	85.4	159	0.21	34.1	18.2	22	202	IR
38	19	758	2	s192	16.69	112.4	157	3.7	40.3	13.3	24	212	IR
38	20	759	2	s140	15.63	103	160	1.99	33.2	16.4	23	216	IR
38	21	760	2	s269	*	73.4	154	*	*	*	20	206	IR
39	2	761	3	s197	19.07	118.2	162	2.59	33.8	14.7	23	213	IR
39	3	762	3	s422	16.55	115.4	156	2	30.5	14.3	21	202	IR
39	4	763	3	s87	18.34	122.8	157	5.02	33	14.9	24	206	IR
39	5	764	3	s170	*	*	*	*	*	*	*	*	IR
39	6	765	3	s45	23.9	120.8	156	4.09	27.7	14.8	24	205	IR
39	7	766	3	s332	21.37	116	156	2.86	31.8	14.9	23	206	IR
39	8	767	3	s263	15.2	87.2	155	0.48	30.8	15.4	16	200	IR
39	9	768	3	s269	18.04	101	154	0.85	26.2	15.4	21	207	IR
39	10	769	3	s160	19.26	132.8	162	1.91	32.1	14.7	23	211	IR
39	11	770	3	s228	19.69	119.8	157	2.78	30.8	14.7	24	210	IR
39	12	771	3	s383	18.96	122.2	156	3.75	31.7	15.8	25	211	IR
39	13	772	3	s355	17.46	113.4	157	3.52	34.8	15.1	20	206	IR
39	14	773	3	s419	*	*	*	*	*	*	*	*	IR
39	15	774	3	s289	*	93	156	*	*	*	26	207	IR
39	16	775	3	s216	19.25	114.4	158	2.56	30.8	15.7	27	210	IR
39	17	776	3	s340	21.34	130.6	156	2.72	29.9	14.1	27	205	IR
39	18	777	3	s109	20.88	99.2	159	0.82	34.3	15.4	22	212	IR
39	19	778	3	s127	22.93	106	155	2.63	32.2	15.8	26	208	IR
39	20	779	3	s302	19.09	127.6	157	1.51	27.2	14.8	25	205	IR
39	21	780	3	s313	28.28	106.4	156	1.97	24.9	14.7	26	208	IR
40	2	781	3	s253	17.95	97.4	155	1.9	30.8	16.2	23	201	IR
40	3	782	3	s359	17.8	112.8	154	3.07	32.3	16.1	20	203	IR
40	4	783	3	s235	18	102	160	2.37	30.3	14.8	20	206	IR
40	5	784	3	s149	18.1	132.4	155	3.16	30.9	14.8	26	211	IR
40	6	785	3	s199	15.39	103	158	3.01	34.2	16.9	20	204	IR
40	7	786	3	s214	17.33	115.4	154	1	29.1	15.7	23	203	IR
40	8	787	3	s240	21.62	127.2	154	2.41	29.2	14.2	25	205	IR
40	9	788	3	s279	19.86	142	158	2.66	32	14.8	27	211	IR
40	10	789	3	s63	16.55	108.4	157	3.96	35.5	14.8	18	208	IR
40	11	790	3	s277	*	*	*	*	*	*	19	*	IR
40	12	791	3	s429	17.63	107.6	158	4.14	33.6	15.3	24	210	IR
40	13	792	3	s210	12.71	137.6	160	2.68	29.8	15.9	22	208	IR
40	14	793	3	s304	20.14	115	157	2.46	29.4	15.4	25	212	IR
40	15	794	3	s380	18.87	119.4	155	3.85	35.9	15.1	22	208	IR
40	16	795	3	s198	21.2	112.6	160	2.45	31.2	15.9	24	212	IR
40	17	796	3	s70	18.09	105.5	156	0.68	35.4	15	21	206	IR
40	18	797	3	s351	17.46	94.8	156	1.71	31.9	15.1	21	206	IR
40	19	798	3	s386	19.42	132.4	168	2.61	28.7	15.1	20	217	IR
40	20	799	3	s117	22.47	104.8	158	2.49	33.6	15.6	23	208	IR
40	21	800	3	s190	18.52	100.4	160	2.01	36.2	16	24	215	IR
41	2	801	3	s378	19.35	112.8	159	5.25	33.3	16.1	23	207	IR
41	3	802	3	s185	25.24	105.6	155	2.88	26.4	14.8	25	205	IR
41	4	803	3	s135	19.93	124.6	157	4.54	31.2	15.4	25	208	IR
41	5	804	3	s416	14.78	101.6	158	0.74	40.5	18.3	23	208	IR
41	6	805	3	s130	15.58	117.6	157	3.6	40.6	15.9	19	207	IR
41	7	806	3	s357	17.21	112.2	154	3.27	31.8	15.7	22	205	IR
41	8	807	3	s234	18.74	115.2	156	2.08	26.8	14.4	23	203	IR
41	9	808	3	s369	15.68	120.2	160	2.72	33.3	14.6	26	214	IR
41	10	809	3	s78	19.2	91.2	158	2.4	33.9	15	18	206	IR
41	11	810	3	s179	21.03	75.8	160	3.69	27.7	14.1	20	208	IR
41	12	811	3	s331	*	54	166	*	*	*	19	*	IR
41	13	812	3	s180	28	114.4	161	3.45	26	13.8	20	208	IR
41	14	813	3	Filler	17.77	114	160	2.84	38.8	14.6	22	212	IR
41	15	814	3	s394	18.46	133.2	157	2.83	31.9	15.9	29	211	IR
41	16	815	3	s348	18.38	96	154	2.33	29	15.3	19	201	IR
41	17	816	3	s163	17.93	133.4	165	1.36	30	15.2	23	215	IR
41	18	817	3	s18	*	*	*	*	*	*	*	*	IR
41	19	818	3	s284	*	*	*	*	*	*	*	*	IR
41	20	819	3	Filler	18.29	98	161	2.9	36.7	16.1	24	214	IR
41	21	820	3	s276	20.51	106.4	159	3.42	25.6	14.3	23	212	IR
42	2	821	3	s94	17.95	90.6	156	4.43	31.9	14.7	25	206	IR
42	3	822	3	s134	18.21	105.8	156	3.21	34.3	15.4	23	205	IR
42	4	823	3	s288	17.97	87.8	155	1.73	24.6	16.2	18	198	IR
42	5	824	3	s80	18.31	109.6	157	3.2	34.7	14.6	24	208	IR
42	6	825	3	s91	17.02	102.4	156	2.94	33.7	15.8	21	207	IR
42	7	826	3	s111	13.16	105.6	158	1.67	35.3	16.9	21	208	IR
42	8	827	3	s413	19.74	123.6	156	3.54	36.8	13.5	25	207	IR
42	9	828	3	s399	14.35	124.6	158	2.52	32.5	15.1	26	212	IR
42	10	829	3	s238	18.99	114.4	163	2.68	29.4	14.7	23	212	IR
42	11	830	3	s433	18.81	108.6	158	4.3	34	15.4	19	208	IR
42	12	831	3	s73	*	*	*	*	*	*	*	*	IR
42	13	832	3	s391	15.9	109.4	161	2.21	35.9	14.8	20	210	IR
42	14	833	3	s77	18.69	109.6	158	2.44	35.5	14.3	24	211	IR
42	15	834	3	s97	19.09	119.4	156	3.98	32.2	14.5	20	206	IR
42	16	835	3	s316	20.06	117.2	158	2.88	29.6	15.1	22	203	IR
42	17	836	3	s356	16.43	121	156	1.79	38.9	14.7	19	204	IR
42	18	837	3	s275	24.35	107.4	157	2.41	26.2	14.3	24	206	IR
42	19	838	3	s267	18.95	91.4	153	2.1	26.6	15.4	21	205	IR
42	20	839	3	s344	17.68	111.2	157	3.28	33.2	15.4	22	208	IR
42	21	840	3	s247	18.9	72	153	1.08	28.9	15.7	16	202	IR
43	2	841	3	s206	23.72	107.8	160	4.1	28.1	14	22	208	IR
43	3	842	3	s220	19.13	114.6	155	2.17	27.3	17.5	20	200	IR
43	4	843	3	s114	26.07	125.6	156	3.99	29	15.2	21	205	IR
43	5	844	3	s249	20.57	97.6	153	1.45	30.6	15.5	21	205	IR
43	6	845	3	s259	19.37	90.8	158	2.36	32.9	15.9	22	206	IR
43	7	846	3	s86	19.82	116.6	154	3.62	29.7	15.1	22	204	IR
43	8	847	3	s343	21.3	89.8	153	2.29	30.7	15.5	21	200	IR
43	9	848	3	s389	16.71	112	157	2.06	33.3	15.1	24	212	IR
43	10	849	3	s102	18.6	124.6	156	2.55	31.5	14.2	25	208	IR
43	11	850	3	s414	19.3	118.6	154	2.75	32.4	15.5	19	201	IR
43	12	851	3	s132	18.34	115.8	156	3.5	36.7	15.3	24	212	IR
43	13	852	3	s81	19.18	84.8	166	2.89	38.5	15.3	16	215	IR
43	14	853	3	s330	*	68	175	*	*	*	13	216	IR
43	15	854	3	s280	*	114	166	*	*	*	20	*	IR
43	16	855	3	s175	14.97	110.6	163	2.83	40.2	15.4	19	210	IR
43	17	856	3	s379	15.75	109.6	158	1.81	33.2	14.8	23	211	IR
43	18	857	3	s221	23.72	109.2	157	2.24	31.6	14.1	25	212	IR
43	19	858	3	s79	19.91	89.2	162	2.85	33.6	15.6	15	213	IR
43	20	859	3	s409	17.63	112	159	3.37	34.9	15.5	21	211	IR
43	21	860	3	s377	16.2	109.4	159	2.58	34.1	16.1	25	212	IR
44	2	861	3	s425	15.1	106	162	3.68	40.5	16.2	20	211	IR
44	3	862	3	s82	16.84	86.2	162	2.78	38.7	15.3	19	212	IR
44	4	863	3	s372	13.56	114.8	158	4.22	35.5	15.8	27	210	IR
44	5	864	3	s95	18.43	112.6	158	3.59	32.7	15	24	207	IR
44	6	865	3	s293	18.83	107.8	155	1.89	28.8	15.4	22	206	IR
44	7	866	3	s358	16.14	133.4	159	4.21	37.3	15.2	20	206	IR
44	8	867	3	s47	18.71	128.4	160	4.04	30.3	14.4	28	216	IR
44	9	868	3	s106	22.5	115.6	156	2.14	30	14.3	25	211	IR
44	10	869	3	s371	17.7	120.8	160	3.12	31.1	14.4	28	216	IR
44	11	870	3	s131	17.64	115.8	158	3.72	33.5	15.7	20	210	IR
44	12	871	3	s223	*	*	*	*	*	*	*	*	IR
44	13	872	3	s244	23.91	108.2	159	1.55	30.7	15	21	210	IR
44	14	873	3	s176	14.28	112.4	162	1.83	41.2	14.4	22	215	IR
44	15	874	3	s224	15.73	125.6	159	3.05	28.3	14.6	21	203	IR
44	16	875	3	s325	20.96	124.2	154	2.98	26.4	15.5	22	206	IR
44	17	876	3	Filler	18.35	116.8	156	1.18	37.5	14.7	25	211	IR
44	18	877	3	s75	20.27	123	156	2.8	35.9	14.1	23	212	IR
44	19	878	3	s212	18.31	106	162	2.02	29.8	15.3	21	211	IR
44	20	879	3	s256	19.38	89.6	154	1.46	28.4	16.7	18	201	IR
44	21	880	3	s196	18.43	104.8	156	2.86	36.9	14.3	22	210	IR
45	2	881	3	s108	20.48	108.8	158	3.73	36.5	15.1	18	208	IR
45	3	882	3	s19	25.04	115.2	160	3.77	28.3	14.2	22	211	IR
45	4	883	3	s128	17.21	107.8	161	2.93	30.2	16	21	211	IR
45	5	884	3	s299	21.15	107.8	156	1.98	29.7	14.8	22	208	IR
45	6	885	3	s55	19	117.2	163	4.08	32.3	15	21	208	IR
45	7	886	3	s162	16.5	110.4	160	3.06	31.6	15.3	22	207	IR
45	8	887	3	s142	19.22	111	159	3.05	31.3	15.6	23	212	IR
45	9	888	3	Filler	17.59	119	158	3.18	36.9	15.4	24	211	IR
45	10	889	3	s323	24.33	109.4	157	2.81	30.3	15.2	24	208	IR
45	11	890	3	s64	18.7	111	157	3.78	35.2	15	21	208	IR
45	12	891	3	s431	14.61	110.8	157	*	42.6	16.7	23	210	IR
45	13	892	3	s397	19.6	117	155	2.59	32.8	14.8	26	208	IR
45	14	893	3	s257	22.08	99	155	1.13	29	14.7	20	203	IR
45	15	894	3	s384	17.55	121.4	156	2.81	30.6	14.4	29	211	IR
45	16	895	3	s96	20.69	118.2	155	3.67	31.1	15	21	204	IR
45	17	896	3	s360	17.54	108	156	2.54	33.6	15.1	22	207	IR
45	18	897	3	s99	24.75	112.8	160	2.44	28.4	15.5	22	212	IR
45	19	898	3	s365	17.24	111.2	156	3.64	37.6	13.6	22	211	IR
45	20	899	3	s400	17.88	115.4	160	3.08	29.1	15.2	26	215	IR
45	21	900	3	s318	*	*	*	*	*	*	*	*	IR
46	2	901	3	s410	15.37	142	170	4.2	29.2	15	18	214	IR
46	3	902	3	s183	16.2	124.8	163	2.73	32	15.7	19	211	IR
46	4	903	3	s241	21.83	102	159	1.65	28.4	15.9	23	207	IR
46	5	904	3	s341	*	*	*	*	*	*	12	*	IR
46	6	905	3	s88	19.39	99.4	163	4.57	34.8	15.1	20	215	IR
46	7	906	3	s376	15.56	102.4	159	3.74	33	15.3	23	208	IR
46	8	907	3	s71	16.69	102	160	3.02	37.5	14	21	209	IR
46	9	908	3	s417	14.41	108.6	159	2.32	39.7	15.6	23	208	IR
46	10	909	3	s222	19.93	129.8	157	3.04	31.1	14.8	25	208	IR
46	11	910	3	s124	19.9	109	157	3.23	30.3	14.8	19	207	IR
46	12	911	3	s342	19.84	115.8	157	4.01	29.7	14.9	22	208	IR
46	13	912	3	s178	19.3	119.4	159	0.83	31.1	13.5	27	216	IR
46	14	913	3	s188	23.57	122.4	158	1.49	30.8	16.4	24	211	IR
46	15	914	3	s173	14.12	97.2	160	2.02	40	15.5	20	207	IR
46	16	915	3	s136	18.9	109.2	162	2.26	35.4	14.7	20	212	IR
46	17	916	3	s307	21.9	115.6	156	1.35	28.5	14.2	20	204	IR
46	18	917	3	s41	16.88	116.4	161	3.34	30.7	13.6	27	216	IR
46	19	918	3	s85	16.43	113.4	157	2.34	34.7	14.7	21	205	IR
46	20	919	3	s52	17.21	114.8	163	2.44	32.2	14.8	16	214	IR
46	21	920	3	s110	19.27	94.4	153	1.24	31.7	14.7	23	203	IR
47	2	921	3	s278	18.16	134.2	161	3.3	29.3	16.5	21	211	IR
47	3	922	3	s310	15.92	105.4	160	2.65	33.5	15.6	22	206	IR
47	4	923	3	s301	16.69	147.6	163	3.17	27.1	15.7	25	208	IR
47	5	924	3	s264	16.65	87.2	154	1.2	31	16.6	18	197	IR
47	6	925	3	s184	16.14	114.6	163	2.06	32.6	15.2	23	212	IR
47	7	926	3	s272	29.12	111	158	5.25	25.8	14.3	22	210	IR
47	8	927	3	s370	*	106	160	*	*	*	20	208	IR
47	9	928	3	s153	19.81	145.2	159	3.6	27.6	16	27	214	IR
47	10	929	3	s271	29.1	117.6	159	3.51	25.5	14.2	21	206	IR
47	11	930	3	s388	18.25	124	162	5.6	37.5	14.3	20	210	IR
47	12	931	3	s129	21.6	120.6	153	3.65	33.7	15.4	24	206	IR
47	13	932	3	s361	22.14	106.2	160	2.64	31.8	14.7	20	208	IR
47	14	933	3	s303	19.25	113.8	162	2.63	31.7	14.8	22	213	IR
47	15	934	3	s140	15.65	117	162	2.47	33.2	16.1	22	214	IR
47	16	935	3	s411	22.88	124.6	155	3.93	33.7	15.6	20	211	IR
47	17	936	3	s273	26.53	138	158	3.2	25.4	14.1	23	208	IR
47	18	937	3	s345	17.8	120.2	156	3.83	37.7	14.4	21	208	IR
47	19	938	3	s428	18.79	127	160	4.38	33.2	14.3	23	212	IR
47	20	939	3	s423	18.72	86	154	1.66	25.2	16.6	17	201	IR
47	21	940	3	s265	20.55	78.6	153	0.95	29.2	17.2	17	192	IR
48	2	941	3	s245	18.29	102.6	160	2.39	28.8	15.7	21	206	IR
48	3	942	3	s363	16.7	103	160	4.05	38.6	15.8	22	214	IR
48	4	943	3	s76	19.58	116.4	159	3.1	36.7	14.4	17	207	IR
48	5	944	3	s154	20.16	127.6	161	4.93	27.9	15.8	23	211	IR
48	6	945	3	s412	15.74	116.2	160	3.81	33.4	15.8	22	208	IR
48	7	946	3	s424	22.62	125.4	156	4.88	28	16.3	21	207	IR
48	8	947	3	Filler	15.8	122.6	159	4.07	36.8	16.1	24	212	IR
48	9	948	3	s298	21.02	134.6	162	3.1	28	15.7	26	215	IR
48	10	949	3	s427	17.03	111.4	161	3.82	33.1	14.9	20	208	IR
48	11	950	3	s335	20.77	117	152	2.62	27.6	15.1	22	204	IR
48	12	951	3	s306	29.56	117.8	158	3.73	27.2	14.8	20	206	IR
48	13	952	3	s139	17.32	117.6	162	2.41	31	14.3	26	217	IR
48	14	953	3	s215	21.02	118	157	2.74	29.9	14.9	24	212	IR
48	15	954	3	s105	*	103.5	160	*	*	*	17	205	IR
48	16	955	3	s406	17.18	133.8	161	3.93	30.7	15.5	25	214	IR
48	17	956	3	s137	20.77	131.6	161	3.03	30.1	14.6	27	215	IR
48	18	957	3	Filler	17.4	122	160	3.43	37.2	15.5	24	214	IR
48	19	958	3	s418	14.9	113.8	159	3.45	39.8	16.3	21	205	IR
48	20	959	3	s396	17.11	116.8	160	3.87	35	15.6	22	212	IR
48	21	960	3	s402	20.13	126.4	160	4.14	29.7	14.9	26	216	IR
49	2	961	3	s43	25.74	116.6	156	2.57	24.6	16.4	21	203	IR
49	3	962	3	s12	20.71	99.4	164	3.24	28.9	15.7	22	212	IR
49	4	963	3	s72	15.71	104.2	157	2.81	36	14.9	21	208	IR
49	5	964	3	s165	25.8	136.4	157	3.88	30.7	14.7	25	206	IR
49	6	965	3	s122	22.9	116.8	155	2.93	28.4	15.7	22	199	IR
49	7	966	3	s328	17.72	115.4	152	1.54	24.7	16.2	17	194	IR
49	8	967	3	s430	14.13	106.4	163	4.83	37.9	15.1	21	212	IR
49	9	968	3	s156	28.05	114.2	158	1.12	26.9	15.7	20	206	IR
49	10	969	3	s57	18.78	110.2	163	4.78	34.7	15	22	214	IR
49	11	970	3	s218	20.24	104.6	153	2.08	25.9	16.4	22	199	IR
49	12	971	3	s169	18.9	114.4	161	4.93	32.1	15.3	21	212	IR
49	13	972	3	s161	24.88	112.6	161	2.9	28.4	12.8	21	211	IR
49	14	973	3	s408	18.12	115.2	163	2.24	34.5	15.2	19	211	IR
49	15	974	3	s375	13.98	109	160	3.13	33.9	15.1	23	210	IR
49	16	975	3	s155	18.53	117.6	160	3.21	34.2	16.2	22	213	IR
49	17	976	3	s336	27.65	118.6	156	4.18	29.6	15.3	20	208	IR
49	18	977	3	s92	17.11	119.8	159	3.35	35	14.8	21	208	IR
49	19	978	3	s113	21.22	114.8	156	3.15	28.8	15.4	25	207	IR
49	20	979	3	s239	20.12	109.6	160	3.43	31.3	15.4	22	206	IR
49	21	980	3	s119	18.78	103.6	160	3.78	33.7	14.6	26	215	IR
50	2	981	3	s121	16.55	105.8	156	2.53	29.1	16.6	23	202	IR
50	3	982	3	s350	21.7	99.8	156	2	27.2	15.9	17	203	IR
50	4	983	3	s420	20.65	110	159	3.6	31.1	15.9	20	209	IR
50	5	984	3	s204	27.53	115.4	159	4.8	30.3	15.1	21	211	IR
50	6	985	3	s334	28.86	132.8	158	2.98	27.4	14.4	21	207	IR
50	7	986	3	s374	18.86	111.6	160	4.19	34	15.1	22	208	IR
50	8	987	3	s395	16.65	113	158	3.4	32.7	16.3	26	208	IR
50	9	988	3	s353	20.81	91.4	153	2.24	29	16	20	202	IR
50	10	989	3	s290	*	*	*	*	*	*	*	*	IR
50	11	990	3	s69	21.94	110.2	160	4.67	32	16	22	212	IR
50	12	991	3	s329	16.88	85.2	157	2.15	27.3	15.8	17	201	IR
50	13	992	3	s404	18.95	134.8	162	2.64	31.7	14.9	24	212	IR
50	14	993	3	s362	22.17	131.2	156	2.16	32.7	13.3	24	210	IR
50	15	994	3	Filler	18.24	111.4	160	3.75	36.1	15.3	22	211	IR
50	16	995	3	s159	16.6	114.8	160	1.54	34.8	17.4	21	208	IR
50	17	996	3	s338	21.46	114.8	153	3.09	29.7	15.1	21	208	IR
50	18	997	3	s158	19.28	129.2	162	2.6	29.2	14.1	22	208	IR
50	19	998	3	s246	19.6	103.4	155	2.08	30	15	20	201	IR
50	20	999	3	s392	15.13	117.6	161	3.24	31.1	14.6	27	215	IR
50	21	1000	3	s347	18.63	81.4	155	2.78	29.9	14.6	18	200	IR
51	2	1001	3	s250	22.19	96.4	161	1.7	30.6	15.7	16	201	IR
51	3	1002	3	s186	18.16	133.8	162	2.7	31.4	15.4	22	211	IR
51	4	1003	3	s144	18.96	132.6	162	3.66	28.2	15.8	21	208	IR
51	5	1004	3	s251	16.31	128.6	158	2.72	28.9	16.2	24	207	IR
51	6	1005	3	s292	18.78	116.4	158	1.94	25.5	16.1	23	202	IR
51	7	1006	3	s83	19.01	100.2	162	3.44	36.7	15.8	19	212	IR
51	8	1007	3	s226	*	*	160	*	*	*	21	213	IR
51	9	1008	3	s339	18.89	127.2	158	4.74	28.6	15.7	27	207	IR
51	10	1009	3	s252	21.5	101.2	156	2.55	32.3	14.9	24	208	IR
51	11	1010	3	s354	20.42	124.2	156	4.67	32.3	15.1	24	207	IR
51	12	1011	3	s367	17.43	121.6	156	4.64	36.1	15.6	28	211	IR
51	13	1012	3	s60	13.54	106.4	163	1.98	40.5	16.8	23	212	IR
51	14	1013	3	s346	18.06	90.4	155	1.54	30.8	15.4	17	200	IR
51	15	1014	3	Filler	17.26	116.2	162	3.91	37.4	15.2	22	212	IR
51	16	1015	3	s398	19.18	134.8	157	3.08	31.2	15.7	25	212	IR
51	17	1016	3	s254	18.9	90.2	156	0.22	31.1	15.8	13	199	IR
51	18	1017	3	s229	22.56	106.8	156	1.61	32.1	15	17	200	IR
51	19	1018	3	s151	22.6	119.2	161	3.21	30.8	15.4	21	213	IR
51	20	1019	3	s236	*	85	162	*	*	*	19	205	IR
51	21	1020	3	s403	14.72	128.8	163	3.73	32.3	14.2	23	214	IR
52	2	1021	3	s31	22.98	122.2	157	3.83	28.4	15.7	23	206	IR
52	3	1022	3	s326	20.62	126.2	155	2.68	28.3	18.8	26	206	IR
52	4	1023	3	Filler	17.36	121.6	160	3.84	38.1	16.2	23	212	IR
52	5	1024	3	s432	17.49	127.2	159	3.56	38.5	15.2	23	212	IR
52	6	1025	3	s393	14.61	126.6	160	3.88	32.1	16	24	213	IR
52	7	1026	3	s195	18.76	106.4	161	2.71	35.9	15.4	21	211	IR
52	8	1027	3	s211	19.37	137.4	163	3.03	27.7	14.6	19	210	IR
52	9	1028	3	s237	17.42	118.4	157	2.8	29.3	15.7	23	205	IR
52	10	1029	3	s138	20.99	117.8	156	3.09	33.3	14	21	208	IR
52	11	1030	3	s262	18.3	93.6	153	2.22	28.3	16	17	201	IR
52	12	1031	3	s385	15.55	130.6	157	3.18	33.5	15.2	24	208	IR
52	13	1032	3	s311	13.25	111.6	162	4.18	32.9	16	23	211	IR
52	14	1033	3	s227	17.14	86	159	0.15	31.2	15.3	18	201	IR
52	15	1034	3	s258	18.85	96.4	156	2.25	28.4	16.1	18	203	IR
52	16	1035	3	s387	17.24	106.2	161	3.34	32.2	15.2	23	208	IR
52	17	1036	3	s317	22.6	115.4	165	1.75	26.5	15	20	211	IR
52	18	1037	3	s407	21.68	113.2	161	2.99	33	14.9	20	211	IR
52	19	1038	3	s230	19.46	120.2	160	2.66	29.3	15.9	22	212	IR
52	20	1039	3	s324	19.78	103	154	2.03	27.1	15.7	20	203	IR
52	21	1040	3	s364	21.63	132.8	159	5.03	33.1	15.1	25	213	IR
53	2	1041	3	s242	19.92	120	158	4.68	28.2	14.9	24	210	IR
53	3	1042	3	s90	18.7	115.4	162	3.59	35	14.7	19	212	IR
53	4	1043	3	s421	20.84	108.6	156	2.84	28.7	16.2	25	208	IR
53	5	1044	3	s390	12.51	125.4	165	3.46	33.7	15.4	21	215	IR
53	6	1045	3	s285	22.08	132	156	3.65	25.8	14.8	23	207	IR
53	7	1046	3	s65	21.56	123.8	156	3.35	30.1	16.3	23	206	IR
53	8	1047	3	s194	18.2	103.2	160	3.73	34.3	15.5	18	211	IR
53	9	1048	3	s56	19.85	122	156	2.97	29.9	15	26	212	IR
53	10	1049	3	s270	24.54	115.2	156	4.3	27	14.1	25	208	IR
53	11	1050	3	s274	16.1	133.6	166	3.69	29.3	15.6	20	214	IR
53	12	1051	3	s53	17.18	136.2	161	4.8	29.1	15.2	25	212	IR
53	13	1052	3	s84	19.67	101.4	161	2.66	35.8	14.5	20	214	IR
53	14	1053	3	s231	15.38	95	164	1.44	30.9	14.9	18	208	IR
53	15	1054	3	s192	16.03	121	158	4.8	42	13.9	24	211	IR
53	16	1055	3	s373	*	*	*	*	*	*	*	*	IR
53	17	1056	3	s327	24.13	120.4	155	1.74	26.1	15.5	22	209	IR
53	18	1057	3	s337	28.47	127.4	160	2.84	28.2	14.1	23	210	IR
53	19	1058	3	s209	20.7	106.4	157	2.46	27.8	15.1	20	205	IR
53	20	1059	3	s157	18.8	112.2	163	2.53	31.9	14.9	23	216	IR
53	21	1060	3	s426	17.11	110.6	162	4.19	39.7	14.9	20	212	IR
54	2	1061	3	s368	17.29	116.8	158	4.76	35.2	15.5	24	211	IR
54	3	1062	3	s255	22.1	86.4	157	0.53	25.6	16.6	11	197	IR
54	4	1063	3	s366	18.52	109.6	158	3.14	36.7	15.4	22	210	IR
54	5	1064	3	s148	16.55	126.6	161	3.7	28.9	15.8	24	211	IR
54	6	1065	3	s168	10.24	100.2	160	1.18	33.8	22.9	22	205	IR
54	7	1066	3	s174	15.43	108.6	160	4.32	32.8	16.5	24	210	IR
54	8	1067	3	s217	17.88	95.2	156	2.07	27.8	17.4	18	201	IR
54	9	1068	3	s319	16.49	109.8	156	3.72	25.9	15.7	22	202	IR
54	10	1069	3	s405	16.31	123.4	161	3.74	30	15	25	212	IR
54	11	1070	3	s93	17.94	111.6	159	4.4	33.6	15.8	19	208	IR
54	12	1071	3	s333	20.54	131.4	156	2.85	26.6	16.7	26	206	IR
54	13	1072	3	s261	20.19	81	154	0.54	26.9	16.1	15	196	IR
54	14	1073	3	s314	19.62	100.8	160	2.65	29.9	15.1	21	208	IR
54	15	1074	3	s164	19.01	99.8	158	3.38	33.5	16	23	210	IR
54	16	1075	3	s205	25.12	105.8	158	4.15	26.4	15.5	23	208	IR
54	17	1076	3	s322	20.9	113.4	154	1.76	31.8	16.1	23	207	IR
54	18	1077	3	s30	25.7	135.4	158	1.94	27.6	14.9	22	208	IR
54	19	1078	3	s282	17.01	110	156	2.53	33.1	15.2	21	211	IR
54	20	1079	3	s115	23.88	114	158	2.8	31.9	16.2	23	208	IR
54	21	1080	3	s112	19.4	109.4	160	3.4	28.6	17.3	22	211	IR
1	2	1	1	s251	18.72	107.6	157	1.42	27.9	15.2	22	206	RF
1	3	2	1	s403	15.16	129	160	2.14	31.6	15	22	209	RF
1	4	3	1	s329	16.72	88	158	1.19	26.8	15.7	9	196	RF
1	5	4	1	s289	18.17	115	157	2.9	26.8	15.3	23	203	RF
1	6	5	1	Filler	17.59	115	154	1.63	36.1	16.4	23	206	RF
1	7	6	1	s142	20.78	113.8	158	1.6	29.7	15.5	21	205	RF
1	8	7	1	s136	17.13	118.8	157	2.08	36.8	15.3	17	205	RF
1	9	8	1	s222	19.8	120.8	154	2.42	28.9	14.9	18	203	RF
1	10	9	1	s248	24.71	93.4	158	1.55	27.6	14.9	14	206	RF
1	11	10	1	s90	18.02	116.8	159	1.71	34.8	15.3	18	205	RF
1	12	11	1	s360	16.22	116.6	156	2.76	32.3	15.4	18	202	RF
1	13	12	1	s321	20.26	142	158	1.46	27.2	15.4	19	204	RF
1	14	13	1	s204	27.28	120	158	2.31	28.1	14.7	14	206	RF
1	15	14	1	Filler	17.99	115	159	0.8	36.8	15.6	22	208	RF
1	16	15	1	s377	17.6	120	157	2.6	32.2	16.5	23	205	RF
1	17	16	1	s430	13.36	103.4	161	1.69	35.7	15.5	18	205	RF
1	18	17	1	s245	19.16	116.4	158	1.68	25.7	15	19	204	RF
1	19	18	1	s278	17	135.6	158	1.21	30.8	15.7	20	205	RF
1	20	19	1	s85	16.48	126.4	158	0.95	33	15.4	12	206	RF
1	21	20	1	s218	19.41	118	158	0.67	24.7	16.4	15	201	RF
1	22	21	1	s225	16	111	162	2.3	28.6	14.9	14	203	RF
1	23	22	1	Filler	17.59	112.6	159	0.76	36.8	15.8	21	207	RF
1	24	23	1	s114	26.66	132.2	154	3.27	27.5	13.4	18	202	RF
1	25	24	1	s107	27.28	94.6	131	1.23	29.7	14.2	48	208	RF
1	26	25	1	s375	13.66	98.8	161	1.14	33.8	15.4	21	206	RF
1	27	26	1	s141	16.6	114.6	161	1.52	35.3	15.7	19	207	RF
1	28	27	1	s72	16.78	112.4	159	1.36	35	14.8	15	207	RF
1	29	28	1	s117	21.88	111.6	160	1.75	30.4	15.8	13	206	RF
1	30	29	1	s431	15.81	107.2	163	0.89	38.2	17.1	16	208	RF
1	31	30	1	s186	16.13	133.2	160	1.18	30	15.1	21	208	RF
1	32	31	1	s97	18.38	122	159	2.62	30.8	15.1	17	205	RF
1	33	32	1	s100	24.03	116	159	0.68	27.4	15.2	15	208	RF
1	34	33	1	s147	16.85	142	162	1.62	29.9	15.4	20	209	RF
1	35	34	1	s305	24.12	133.6	156	3.09	26.7	14.9	16	204	RF
1	36	35	1	s280	15.66	131.6	158	2.84	27.8	15	21	205	RF
1	37	36	1	s335	22.62	119.8	158	2.03	27.7	15.1	20	205	RF
1	38	37	1	s154	20.48	129.8	156	3.28	28.9	15.6	24	206	RF
1	39	38	1	s81	17.62	82.8	159	2.5	36.9	16.4	19	208	RF
1	40	39	1	s396	18.28	136.4	160	3.35	34	15.7	17	206	RF
1	41	40	1	s388	17.6	126.4	158	2.57	36	15.9	22	205	RF
1	42	41	1	s73	18.23	114.6	161	2.45	34	15.6	19	206	RF
1	43	42	1	s143	16.01	125.4	159	2.58	31.1	15.5	22	209	RF
1	44	43	1	s433	16.78	125	159	3.62	33.9	15.4	18	206	RF
1	45	44	1	s287	18.69	130.8	158	1.57	26.3	15.5	22	205	RF
1	46	45	1	s140	16.38	120.4	158	2.83	32.9	15.5	21	207	RF
2	2	46	1	s110	19.99	101.8	146	1.31	28.7	16	22	205	RF
2	3	47	1	s148	15.79	136.2	158	1.32	28.6	15.2	22	206	RF
2	4	48	1	s372	13.82	116	156	2.18	35.6	16.3	23	205	RF
2	5	49	1	s371	17.9	118.2	158	2.76	30.6	14.7	24	209	RF
2	6	50	1	s180	29.1	129.2	154	2.6	24.6	13.2	17	205	RF
2	7	51	1	s347	20.18	91.2	152	1.22	26	15.9	13	196	RF
2	8	52	1	s79	19.55	88.6	158	1.47	31	16.4	13	205	RF
2	9	53	1	s345	17.53	100	158	2.72	32.9	15.5	14	206	RF
2	10	54	1	s361	19.33	107.4	158	2.28	29.4	15.9	14	205	RF
2	11	55	1	s314	20.78	109.6	157	1.98	29.2	14.7	16	205	RF
2	12	56	1	s273	26.42	135.8	155	3	25.8	13.5	18	203	RF
2	13	57	1	s208	20.87	125.8	157	1.98	26.7	14.2	21	205	RF
2	14	58	1	s106	22.85	110.6	158	1.4	28.2	14.6	17	205	RF
2	15	59	1	s389	17.36	107.2	163	0.84	32.6	15	19	207	RF
2	16	60	1	s394	18.5	132	159	1.85	31.6	16	23	209	RF
2	17	61	1	s135	18.79	134.8	158	2.63	30.6	14.2	22	205	RF
2	18	62	1	s64	18.5	107.2	161	1.59	33.7	14.6	17	207	RF
2	19	63	1	Filler	17.34	115.2	163	0.99	37.5	15.9	18	208	RF
2	20	64	1	s205	24.13	101.2	161	2.27	25.7	15	19	205	RF
2	21	65	1	s56	20.12	140.2	158	2.24	28.9	15.1	23	206	RF
2	22	66	1	s138	19.36	114	159	1.17	33.6	14.9	16	207	RF
2	23	67	1	s407	19.88	110.6	163	1.72	32.8	14.5	16	206	RF
2	24	68	1	s356	15.38	136.2	157	1.9	36.6	15.4	18	204	RF
2	25	69	1	s115	23.25	124	159	2.53	30.2	14.5	19	207	RF
2	26	70	1	s369	15.61	114	162	1.11	32.6	15.6	20	209	RF
2	27	71	1	s200	19.48	123	160	1.92	31.1	14.8	20	208	RF
2	28	72	1	s326	19.35	129	158	1.66	28.9	15.5	21	205	RF
2	29	73	1	s328	18.48	111.2	158	0.74	27.2	15.8	15	200	RF
2	30	74	1	s402	19.16	136.8	159	2.26	30	14.4	23	207	RF
2	31	75	1	s43	25.28	110.8	161	1.3	24.5	15.4	18	205	RF
2	32	76	1	s159	16.61	113.2	163	0.44	33.4	17.2	14	206	RF
2	33	77	1	s271	28.22	124	159	2.36	25.9	13.8	19	208	RF
2	34	78	1	s66	20.69	117.4	161	1.42	31.4	14.2	14	205	RF
2	35	79	1	s198	19.97	118	162	1.52	29.4	15.1	15	205	RF
2	36	80	1	s344	17.73	123	159	2.68	32.9	15	16	206	RF
2	37	81	1	s172	16.23	110	160	1.26	34.3	14.8	19	206	RF
2	38	82	1	s65	20.25	132.6	160	2.22	31	14.7	19	207	RF
2	39	83	1	s304	17.48	132.2	163	3.85	28.6	15.9	18	209	RF
2	40	84	1	s331	15.21	129	159	2.62	26.3	14.4	21	205	RF
2	41	85	1	s332	19.77	120.6	162	2.21	32.2	15.9	17	207	RF
2	42	86	1	Filler	16.51	125	160	0.99	39	15.9	22	208	RF
2	43	87	1	s60	13.61	123.8	164	2.38	42.2	18.8	18	207	RF
2	44	88	1	s52	16.5	151.4	161	2.73	32.1	16.1	21	206	RF
2	45	89	1	s263	15.16	92.4	158	1.15	29.5	15.6	14	205	RF
2	46	90	1	s179	21.15	89.8	161	2.55	27.9	14.7	19	207	RF
3	2	91	1	s227	14.26	111	155	1.83	29.7	15.1	23	203	RF
3	3	92	1	s374	16.24	114.6	159	1.18	35.7	14.4	21	206	RF
3	4	93	1	s233	19.78	104	156	1.46	28.5	14.7	16	202	RF
3	5	94	1	s190	18.42	120.4	158	2.03	36.5	15.4	20	205	RF
3	6	95	1	s76	19.37	110.8	159	2	34.2	15	12	206	RF
3	7	96	1	s196	18.86	105.8	156	0.98	33.9	16.3	18	206	RF
3	8	97	1	s358	15.23	130.6	154	2.47	36.3	15.1	20	201	RF
3	9	98	1	Filler	18.76	117.4	159	1.74	37.1	15.3	22	208	RF
3	10	99	1	Filler	17.45	114.8	159	1.04	36	15.7	22	207	RF
3	11	100	1	s319	16.07	124.2	155	2.36	26.3	15	17	202	RF
3	12	101	1	s131	18.39	122.2	156	3.04	33.8	14.7	20	205	RF
3	13	102	1	s363	15.59	102.2	161	1.2	37	15	18	209	RF
3	14	103	1	s268	25.78	117.2	157	1	27.9	15.1	18	205	RF
3	15	104	1	s297	22.47	178.8	169	1.43	27	14.4	17	207	RF
3	16	105	1	s160	18.04	139.2	161	0.66	32.6	15	25	208	RF
3	17	106	1	s229	21.31	112.2	160	1.47	29.4	14.8	16	203	RF
3	18	107	1	Filler	17.05	120.2	160	1.38	37.8	15.3	21	208	RF
3	19	108	1	s288	16.87	76.8	159	0.57	25.1	16.3	12	201	RF
3	20	109	1	s357	16.18	115.8	158	0.9	30.4	16.2	15	203	RF
3	21	110	1	s299	22.77	124.6	159	1.13	27.9	14.4	17	205	RF
3	22	111	1	s256	17.63	93	163	0.37	26	15.6	6	201	RF
3	23	112	1	s94	18.38	116.2	157	2.35	29.7	13.8	22	204	RF
3	24	113	1	s400	17.86	120.4	161	1.54	30.7	15	21	208	RF
3	25	114	1	s311	12.96	111.6	163	1.72	32.7	15.6	19	205	RF
3	26	115	1	s101	17	88.8	161	0.62	29	15.8	17	202	RF
3	27	116	1	s406	16.93	129.6	160	2.14	30.6	15	21	206	RF
3	28	117	1	s207	25.447	116.2	161	1.82	28.2	15	18	206	RF
3	29	118	1	s176	14.07	117.6	165	1.91	40.8	12.3	16	207	RF
3	30	119	1	s77	17.56	126.2	161	2.7	34.8	14.9	19	205	RF
3	31	120	1	s378	18.84	118	161	2.29	32.4	14.9	19	206	RF
3	32	121	1	s108	19.16	119.4	161	1.28	34.4	15.3	10	205	RF
3	33	122	1	s166	14.62	121.4	161	0.66	33	15.2	20	206	RF
3	34	123	1	s269	17.19	108.2	162	1.33	27	15.7	15	206	RF
3	35	124	1	s213	18.63	111	167	0.33	31.1	15.2	15	208	RF
3	36	125	1	s324	19.52	101.4	161	1.65	28.3	15.3	14	205	RF
3	37	126	1	s395	15.81	120.8	161	1.9	34.6	15.5	21	209	RF
3	38	127	1	s346	16.33	100	161	1.15	30.9	15.6	13	201	RF
3	39	128	1	s182	16.5	143	162	2.11	31.9	16.2	19	208	RF
3	40	129	1	s253	17.02	118.4	159	1.76	30.2	15.6	19	206	RF
3	41	130	1	s139	16.81	126.4	163	2.6	31.1	15.3	24	210	RF
3	42	131	1	s124	18.64	118.2	160	2	30.9	15.7	15	205	RF
3	43	132	1	s197	17.91	132.6	161	2.65	31.4	15.6	21	208	RF
3	44	133	1	s301	16.08	163.6	162	2.31	27.7	17.1	23	206	RF
3	45	134	1	s132	17.43	133.2	158	3.28	37.3	15.3	22	209	RF
3	46	135	1	s129	17.66	124	156	2.37	35.5	15.6	19	205	RF
4	2	136	1	s211	18.29	128.4	160	1.1	28	15.5	19	205	RF
4	3	137	1	s162	17.11	115.4	157	1.3	31.1	15.8	20	205	RF
4	4	138	1	s96	21.16	114.6	155	2.01	30.1	14.8	18	204	RF
4	5	139	1	s262	17.03	91.8	156	0.94	27.5	15.6	19	203	RF
4	6	140	1	s376	15.76	99.4	158	1.35	33.4	16	21	206	RF
4	7	141	1	s385	14.41	124.8	156	1.56	31.8	15.9	16	205	RF
4	8	142	1	s119	17.39	120.2	160	2.06	32.5	15.3	21	207	RF
4	9	143	1	s309	17.12	112.6	158	1.97	34.2	15.5	16	206	RF
4	10	144	1	s232	15.75	115.8	160	0.67	29.7	15.4	19	207	RF
4	11	145	1	s158	17.67	139	159	1.83	28.3	14.2	21	204	RF
4	12	146	1	s149	19.85	139.4	155	2.07	28.4	14.4	25	196	RF
4	13	147	1	s418	14.34	112.6	160	1.21	37.9	16.2	19	205	RF
4	14	148	1	s284	20.89	123.2	160	1.84	24.4	14.8	17	204	RF
4	15	149	1	s382	18.75	135.8	160	1.4	29.6	14.4	21	208	RF
4	16	150	1	s362	22.66	138.6	156	1.49	32.7	15.1	24	207	RF
4	17	151	1	s327	13.61	121.2	159	0.78	27.2	15.2	19	206	RF
4	18	152	1	Filler	16.73	121.4	162	1.36	39	15.2	20	208	RF
4	19	153	1	s214	16.95	116.4	160	0.92	29.2	15.6	16	206	RF
4	20	154	1	s122	21.08	116.2	162	0.78	28.9	15.3	14	204	RF
4	21	155	1	s296	18.1	151.8	164	1.3	30.1	15.8	18	207	RF
4	22	156	1	s69	21.38	129.6	161	2.06	32	15.2	18	206	RF
4	23	157	1	s408	16.39	123.6	163	1.77	34.1	15.4	17	207	RF
4	24	158	1	s315	20.39	116.2	163	1.19	28.6	15.4	18	207	RF
4	25	159	1	s337	28.46	132.8	160	1.74	28.1	14.2	14	206	RF
4	26	160	1	s113	18.57	124.8	160	1.28	27.7	16.6	17	204	RF
4	27	161	1	s270	25.35	134.2	159	2.03	25	14.6	15	204	RF
4	28	162	1	s234	17.18	114.4	161	1.48	26.8	15.5	19	203	RF
4	29	163	1	s404	18.15	135.8	161	1.76	31.4	15.4	22	207	RF
4	30	164	1	s313	27.99	125.2	156	1.73	24.7	13.8	17	204	RF
4	31	165	1	Filler	16.63	115.2	163	0.95	37.9	15.9	18	208	RF
4	32	166	1	s255	20.16	90.6	164	0.25	28.8	15.5	7	205	RF
4	33	167	1	s236	17.89	115.2	160	1.48	24.9	14.5	15	204	RF
4	34	168	1	s384	16.9	125.8	161	1.44	31.1	15	21	208	RF
4	35	169	1	s47	18.37	126.8	163	2.04	31.1	14.3	24	210	RF
4	36	170	1	s380	17.33	115.6	161	1.77	35.4	14.6	15	207	RF
4	37	171	1	s93	17.28	118.6	164	2.67	34.5	15	15	206	RF
4	38	172	1	s281	22.43	136	161	3.07	29.4	14.3	20	209	RF
4	39	173	1	s303	17.14	135.2	164	2.47	32.2	16.1	17	208	RF
4	40	174	1	s237	15.94	146.4	161	3.13	30.2	16.2	18	205	RF
4	41	175	1	s181	14.28	115.2	164	1.16	33.3	16.4	17	208	RF
4	42	176	1	s86	17.95	134	158	3.73	30.6	16	18	207	RF
4	43	177	1	s390	13.95	139	164	2.48	35.3	16.5	22	209	RF
4	44	178	1	s127	20.99	133.4	159	2.95	33	17.1	20	208	RF
4	45	179	1	s88	17.99	120.2	162	3.04	35.2	15.6	20	209	RF
4	46	180	1	s366	18.34	129.8	158	2.83	37.8	15.6	23	208	RF
5	2	181	1	s261	21.55	84	145	0.45	25	16	18	196	RF
5	3	182	1	s424	22.25	116.8	153	1.55	27.6	15.8	17	205	RF
5	4	183	1	s392	14.28	121.4	156	1.29	30.4	16.3	24	204	RF
5	5	184	1	s221	22.17	112.2	156	1.8	31.1	15.1	17	204	RF
5	6	185	1	s318	15.73	112	160	1.05	31.2	16.3	20	202	RF
5	7	186	1	s111	13.19	102.4	159	0.66	33	17.8	12	201	RF
5	8	187	1	s411	19.64	116.6	156	1.68	33	16.1	15	206	RF
5	9	188	1	Filler	16.58	104	161	0.49	36.8	16.4	18	206	RF
5	10	189	1	s413	19.24	123	154	2.17	34.5	15.1	26	205	RF
5	11	190	1	s412	15.84	114.8	160	1.65	31.3	15.6	19	204	RF
5	12	191	1	s175	13.11	111.8	161	1.38	38.2	15.7	19	203	RF
5	13	192	1	s155	19.09	122.2	158	1.38	33	15.6	22	206	RF
5	14	193	1	s265	19.92	88.4	162	0.11	25.5	15.7	9	193	RF
5	15	194	1	s174	14.53	108.4	163	1.2	34.5	15.8	19	206	RF
5	16	195	1	s348	17.24	122.2	161	0.81	27.4	15.6	15	203	RF
5	17	196	1	s306	29.47	124.8	155	2.74	27.3	14.1	21	205	RF
5	18	197	1	s285	21.3	127.8	158	1.74	26.8	13.4	18	206	RF
5	19	198	1	s87	18.59	127	161	2.61	30	14.9	17	203	RF
5	20	199	1	s417	12.98	116.8	163	0.63	36.6	16.3	16	204	RF
5	21	200	1	s351	16.38	109	162	0.99	29.4	15.8	11	202	RF
5	22	201	1	s244	23.42	116.6	161	1.23	29.4	15.3	18	207	RF
5	23	202	1	s123	20.85	121.2	161	1.25	34.7	16.1	18	205	RF
5	24	203	1	s416	17.39	91.25	164	0.11	33.4	16.1	17	205	RF
5	25	204	1	s220	17.61	117.4	161	1.4	27.1	16.3	16	203	RF
5	26	205	1	s156	26.57	126	156	0.98	26.1	13.8	15	204	RF
5	27	206	1	s387	15.37	111.6	162	1.51	31.7	17.1	19	205	RF
5	28	207	1	s112	19.22	116.2	163	1.99	25.7	15.1	16	206	RF
5	29	208	1	s341	14.94	108.8	163	1.11	24.3	16.3	13	196	RF
5	30	209	1	s316	20.03	115.4	160	1.73	28.8	15.3	19	203	RF
5	31	210	1	s50	17.94	129.8	164	2.27	28.5	14.9	18	204	RF
5	32	211	1	s224	14.9	120.4	160	1.96	27.1	15.4	18	205	RF
5	33	212	1	s325	19.43	113.2	160	1	25.3	16	17	205	RF
5	34	213	1	s379	15.2	114.6	164	1.65	33.8	15.7	18	207	RF
5	35	214	1	s250	19.45	90.6	163	1.52	29.4	14.6	14	206	RF
5	36	215	1	s67	20.51	127	163	1.64	33.4	14.2	18	206	RF
5	37	216	1	s312	23.28	132.4	161	2.33	29.4	14.6	24	207	RF
5	38	217	1	Filler	17.75	111.8	165	1.36	36.6	15.1	19	208	RF
5	39	218	1	s409	17.25	122.6	163	2.32	35.9	16.2	19	207	RF
5	40	219	1	s368	16.82	137.8	163	4.54	34.8	15	19	207	RF
5	41	220	1	s240	19.71	125.6	161	1.99	29.1	15.3	20	206	RF
5	42	221	1	s168	12.08	106	161	0.87	36.2	23.8	22	205	RF
5	43	222	1	s5	16.31	152.6	164	1.46	32.7	15.8	21	208	RF
5	44	223	1	s130	14.6	139.8	161	3.21	40.5	16.1	17	205	RF
5	45	224	1	s102	17.19	140.4	158	2.92	31.8	15.8	23	204	RF
5	46	225	1	s19	23.45	143.8	159	4.01	28.4	14.7	21	206	RF
6	2	226	1	s215	21.99	105.8	157	0.99	31.6	16.4	22	205	RF
6	3	227	1	s399	14.28	120.6	158	1.18	32.8	16	23	206	RF
6	4	228	1	Filler	16.39	109.6	160	1.66	37.6	16.3	20	206	RF
6	5	229	1	s163	15.66	138	163	0.97	30.8	16	23	207	RF
6	6	230	1	s243	21.46	102.6	159	1.37	28.2	15.7	14	205	RF
6	7	231	1	s161	21.09	115.2	159	0.6	29.8	15.5	18	203	RF
6	8	232	1	s185	21.83	119	155	1.02	25.9	14.9	15	205	RF
6	9	233	1	s423	17.49	84.4	153	0.42	25.8	17.3	14	196	RF
6	10	234	1	s137	20	128.4	158	2.17	29.7	14.8	24	208	RF
6	11	235	1	s300	20.65	146.2	159	1.34	28.2	14.7	20	205	RF
6	12	236	1	s279	20.74	136.2	160	1.93	31	15.5	22	207	RF
6	13	237	1	s91	20.04	107.4	161	1.08	30.6	15.6	16	205	RF
6	14	238	1	s226	15.29	118	159	1.4	25.5	15.2	20	204	RF
6	15	239	1	s320	15.64	96	163	0.36	27.7	15.9	12	200	RF
6	16	240	1	Filler	16.73	111.8	161	1.66	38.5	15.4	20	207	RF
6	17	241	1	s178	20.37	135.6	163	0.77	31.5	14.3	19	208	RF
6	18	242	1	s264	16.73	89.4	164	0.35	28.5	15.7	12	204	RF
6	19	243	1	s428	17.3	120	161	2.78	31.7	15	19	206	RF
6	20	244	1	s246	16.29	105.2	161	1.46	28.4	15.9	14	204	RF
6	21	245	1	s98	17.03	125.6	164	1.46	30.8	15.6	17	203	RF
6	22	246	1	s109	19.99	118.8	163	1.09	32.2	15.6	19	208	RF
6	23	247	1	s302	19.2	135.8	158	2.15	27.1	14.2	22	206	RF
6	24	248	1	Filler	16.28	114.2	162	1.06	37	15.3	19	207	RF
6	25	249	1	s128	17.45	115.8	164	1.31	30.2	16.1	18	207	RF
6	26	250	1	s78	20.41	103.6	163	1.25	29.5	16.9	13	204	RF
6	27	251	1	s49	16.9	120.4	165	1.89	29	16	16	205	RF
6	28	252	1	s310	16.18	116.2	163	2.19	29.5	15.4	15	206	RF
6	29	253	1	s120	27.41	98.4	163	1.66	27.8	14.9	15	207	RF
6	30	254	1	s18	16.96	113.6	163	2.1	27.3	13.9	16	203	RF
6	31	255	1	s173	13.41	99.6	163	0.85	39.6	15.7	16	205	RF
6	32	256	1	s292	16.98	111.2	160	1.2	25.1	16.3	20	204	RF
6	33	257	1	s133	19.45	119.2	163	1.5	33.8	15.3	14	206	RF
6	34	258	1	s84	18.38	106.4	163	1.26	35.7	14.7	14	206	RF
6	35	259	1	s291	23.49	104.4	164	1.16	27.8	15.3	12	205	RF
6	36	260	1	s429	18.45	108.8	163	1.4	31.6	15.3	18	206	RF
6	37	261	1	s104	19.17	122.8	163	1.37	28.9	15.4	17	205	RF
6	38	262	1	Filler	17.11	127.6	165	1.87	39.5	14.9	20	209	RF
6	39	263	1	s317	20.4	130.4	167	2.46	28	15.9	19	209	RF
6	40	264	1	s260	17.41	110.8	161	1.25	33.3	15.8	18	206	RF
6	41	265	1	s31	21.36	116.6	160	2.96	30.3	15.5	21	207	RF
6	42	266	1	s414	19.29	120.4	159	2.15	30.9	16.4	15	206	RF
6	43	267	1	s364	22.85	131.6	157	3.53	34.1	15.1	22	208	RF
6	44	268	1	s258	17.8	111	159	1.22	28.1	16.7	16	207	RF
6	45	269	1	s343	21.72	110.4	159	1.8	29.5	15.6	15	205	RF
6	46	270	1	s393	14.36	135.6	161	3.09	33.7	16.3	21	208	RF
7	2	271	1	Filler	17.6	111.6	158	1.54	35.7	16.2	21	206	RF
7	3	272	1	s46	19.24	129	160	1.33	30.2	15.1	22	204	RF
7	4	273	1	Filler	16.34	111.2	159	1.34	39	16.1	20	206	RF
7	5	274	1	s254	17.56	92.2	153	0.43	28.6	16.5	17	196	RF
7	6	275	1	s339	17.87	118	157	2.07	27.5	15.8	20	200	RF
7	7	276	1	s103	18.51	92	153	0.63	26.9	15.8	17	198	RF
7	8	277	1	s359	19.13	118.6	154	1.37	27.9	16.5	17	196	RF
7	9	278	1	s71	16.71	115.4	159	0.69	35.7	15.6	14	204	RF
7	10	279	1	s432	16.14	116.8	161	1.74	38.4	16.3	20	206	RF
7	11	280	1	s386	18.49	124.4	168	1.2	27.3	15.6	19	210	RF
7	12	281	1	s164	19.12	118	161	1.53	30.5	15.1	12	205	RF
7	13	282	1	s192	14.78	122.6	161	1.6	41.9	15	19	207	RF
7	14	283	1	s188	24.04	131	157	0.79	27.8	16.2	18	205	RF
7	15	284	1	s333	21.56	134.6	157	1.37	27.2	14.8	20	203	RF
7	16	285	1	s206	23.42	111	161	2.17	26.3	14.5	19	206	RF
7	17	286	1	s238	17.87	122.2	162	1.68	28.3	14.6	20	207	RF
7	18	287	1	s34	19.34	120.4	156	1.72	25.7	15.1	19	201	RF
7	19	288	1	s157	19.78	126.6	161	1.87	32.3	15.3	20	208	RF
7	20	289	1	s274	15.88	126.2	167	1.74	28.8	15.7	15	208	RF
7	21	290	1	s405	16.56	123.8	160	1.93	28.2	14.8	21	205	RF
7	22	291	1	s426	16.42	113.6	164	1.06	39.6	14.3	15	206	RF
7	23	292	1	s398	19.21	138	158	2.39	30.2	14.9	23	207	RF
7	24	293	1	s267	18.97	107	160	1.03	26.8	15.1	15	201	RF
7	25	294	1	s80	18.1	116.8	160	1.4	34	15.8	17	205	RF
7	26	295	1	s230	17.36	123.2	163	1.54	29.1	16.3	18	206	RF
7	27	296	1	s62	19.28	102.2	163	0.32	31.5	15.7	14	206	RF
7	28	297	1	s150	18.15	115	163	2.37	33.1	14.8	19	205	RF
7	29	298	1	s134	17.27	106.6	163	1.42	34.9	15.6	14	206	RF
7	30	299	1	Filler	16.58	111.8	164	0.76	38.1	15.9	18	207	RF
7	31	300	1	s391	14.85	119.6	163	1.71	35.8	15.7	17	208	RF
7	32	301	1	s75	18.84	122.8	160	2.18	32.7	15.7	18	205	RF
7	33	302	1	s12	19.42	94.4	164	0.59	31.3	15.8	16	205	RF
7	34	303	1	s370	16.26	136.4	159	2.19	34.1	14.1	19	208	RF
7	35	304	1	s118	17.72	115.8	163	1.21	29.5	15.8	17	201	RF
7	36	305	1	s266	17.89	107.6	161	1.56	26.8	15.3	16	204	RF
7	37	306	1	s340	21.86	128.2	161	2.27	29.2	14.2	19	205	RF
7	38	307	1	s307	19.33	115	161	0.88	31.1	14.9	14	202	RF
7	39	308	1	s415	20.3	127.6	161	2.95	34.1	16	21	208	RF
7	40	309	1	s187	21.78	111.2	161	1.93	26.6	15.3	17	206	RF
7	41	310	1	s427	16.74	106.6	163	2.29	32.7	16.7	17	207	RF
7	42	311	1	s57	16.68	121.2	163	2.68	33.6	16.1	19	205	RF
7	43	312	1	s146	14.8	141.6	161	2.84	30.7	15	21	206	RF
7	44	313	1	s308	18.84	106	161	1.19	30.2	16.3	16	205	RF
7	45	314	1	s330	15.87	144	166	1.37	27.7	15.7	15	205	RF
7	46	315	1	s195	18.3	119.6	161	2.17	35.9	15.3	21	207	RF
8	2	316	1	s169	19.91	107.4	158	1.5	30.8	15.3	17	207	RF
8	3	317	1	s105	15.04	125.2	158	0.67	27.4	15.7	15	204	RF
8	4	318	1	s125	23.57	119	160	1.19	30	15.4	18	207	RF
8	5	319	1	s354	17.4	104	160	1.1	32.2	15.8	19	205	RF
8	6	320	1	s53	17.13	135	159	2.02	29	15.1	23	206	RF
8	7	321	1	Filler	16.22	113	160	1.1	37.2	16.9	19	206	RF
8	8	322	1	s419	17.53	120.2	160	1.38	35.2	15.6	18	206	RF
8	9	323	1	s92	16.9	126.6	159	1.52	32.9	16.2	19	204	RF
8	10	324	1	s350	16.37	93.2	161	0.43	29.8	16.5	14	203	RF
8	11	325	1	s99	23.07	126.6	159	2.07	26.4	15.8	21	207	RF
8	12	326	1	s74	22.46	115.6	161	1.09	29.9	16.3	12	204	RF
8	13	327	1	s259	17.21	93.2	164	1.08	31.9	16	15	205	RF
8	14	328	1	s191	17.52	114.2	163	0.92	37.6	16.2	17	205	RF
8	15	329	1	s365	16.51	121	163	1.91	36.7	15.7	17	206	RF
8	16	330	1	s194	17.65	106.4	163	1.3	32.7	15.7	15	205	RF
8	17	331	1	s45	21.31	126.4	162	2.26	28	14.7	19	206	RF
8	18	332	1	s286	24.45	126	162	1.42	24.7	14.8	18	204	RF
8	19	333	1	s367	17.95	116.4	163	1.47	32.3	16.2	18	208	RF
8	20	334	1	s41	15.77	119.8	161	2.19	30.4	15.1	21	208	RF
8	21	335	1	s151	20.81	119.8	161	1.86	29.4	16.9	19	207	RF
8	22	336	1	s209	18.06	123.4	161	1.68	25	14.8	17	205	RF
8	23	337	1	Filler	17.11	118.8	163	1.3	37.4	15.9	18	206	RF
8	24	338	1	s61	20.4	112.8	161	1.09	31.3	15.9	14	206	RF
8	25	339	1	s165	25.61	143.6	156	2.65	27.7	14.4	23	206	RF
8	26	340	1	s293	17.5	105.2	161	0.81	27.2	16.6	17	205	RF
8	27	341	1	s13	23.01	116.2	163	1.97	26	14.3	15	206	RF
8	28	342	1	s184	16.08	130.4	162	0.86	32.4	14.9	20	209	RF
8	29	343	1	s334	28.41	136.2	161	2.4	26.4	13.9	16	204	RF
8	30	344	1	s290	16.26	112.2	162	1.51	31.7	16.4	17	206	RF
8	31	345	1	s8	18.83	110.8	161	1.3	30	15.9	14	205	RF
8	32	346	1	s355	17.75	114.4	163	1.73	31.2	15.7	14	206	RF
8	33	347	1	s249	18.16	108.2	163	0.69	28.5	16.2	12	205	RF
8	34	348	1	s322	18.61	120.6	161	1.4	32	14.6	16	207	RF
8	35	349	1	s353	17.32	100.4	162	0.87	30.9	14.6	13	201	RF
8	36	350	1	s342	20.37	118.6	163	2.06	27.5	15.2	16	206	RF
8	37	351	1	s239	20.52	130.8	160	1.81	31.3	15.2	19	205	RF
8	38	352	1	s235	18.32	113	163	2.03	28.5	14.8	16	205	RF
8	39	353	1	s170	16.12	126.8	165	3.49	39.1	15.7	17	209	RF
8	40	354	1	s420	20.67	125.8	161	3.05	31.2	16.9	18	207	RF
8	41	355	1	s336	25.97	121	160	2.72	27	15.7	20	205	RF
8	42	356	1	s199	15.47	107.4	163	1.75	33.3	17.9	14	204	RF
8	43	357	1	s30	27.07	147.6	160	2.23	27.8	15.9	19	207	RF
8	44	358	1	s58	19.37	152.6	159	1.71	28.5	16.7	23	207	RF
8	45	359	1	s272	28.42	130	158	1.85	25.4	14.6	17	206	RF
8	46	360	1	s116	20.04	95.5	158	0.17	29	16.1	19	206	RF
9	2	361	1	s217	18.08	105.4	152	0.79	26.5	17.1	15	196	RF
9	3	362	1	s323	24.49	102.6	155	1.09	26.1	15.6	15	199	RF
9	4	363	1	s55	19.03	110.6	156	2.01	28.6	15.4	20	205	RF
9	5	364	1	s145	14.77	109.6	161	1.27	32.4	15.9	19	204	RF
9	6	365	1	s51	17.61	119.4	160	1.91	29.5	15.3	20	203	RF
9	7	366	1	s82	16.98	64.4	165	0.72	33	17.6	12	205	RF
9	8	367	1	s63	15.52	107	161	1.07	32.7	16.4	12	204	RF
9	9	368	1	Filler	16.5	115.2	161	0.7	37	15.9	19	206	RF
9	10	369	1	s231	14.97	119.8	158	1.07	27.4	15	20	201	RF
9	11	370	1	s153	20.89	143.8	158	2.22	26.3	15.6	21	207	RF
9	12	371	1	s210	13.34	124.2	159	1.49	28.5	16.5	21	202	RF
9	13	372	1	s277	13.49	112.8	160	1	25.3	15.8	17	200	RF
9	14	373	1	s373	14.43	109.6	161	0.96	36.9	17.4	20	205	RF
9	15	374	1	s257	20.04	107.4	161	0.47	26.8	15.5	10	203	RF
9	16	375	1	s54	16.92	107.6	164	1.32	28.2	15.9	16	203	RF
9	17	376	1	s338	20.45	118.4	156	1.86	27.4	15	14	204	RF
9	18	377	1	s242	18.45	116.8	162	2.28	29.3	15	19	206	RF
9	19	378	1	s282	16.39	112.6	163	1.19	33.3	16	15	205	RF
9	20	379	1	s70	18.11	104.8	162	0.83	33.7	16.2	13	205	RF
9	21	380	1	s167	16.62	103.4	164	0.51	34.3	18.2	15	203	RF
9	22	381	1	s183	17.14	130.4	160	1.84	30.7	15	20	207	RF
9	23	382	1	s275	21.14	118.8	160	2.35	26.5	13.9	17	204	RF
9	24	383	1	s410	16.32	145.4	168	2.25	30.2	14.6	16	208	RF
9	25	384	1	s223	15.16	143.8	158	1.44	27.3	14	20	202	RF
9	26	385	1	s422	16.99	103	160	0.4	28.8	15.1	17	205	RF
9	27	386	1	s247	19.09	99.2	164	0.39	24.9	16.5	8	196	RF
9	28	387	1	s421	18.29	111.8	162	1.26	29.6	16	17	206	RF
9	29	388	1	s397	19.41	118	161	1.89	29.7	15.4	18	205	RF
9	30	389	1	s425	13.64	96.4	164	1.16	38.1	15.8	17	206	RF
9	31	390	1	s383	18.52	121.8	161	2.97	30.6	16.1	20	206	RF
9	32	391	1	s219	18.42	110.8	163	1.36	30.1	15.7	14	202	RF
9	33	392	1	s252	19.28	105.2	164	1.6	30.4	15.9	13	206	RF
9	34	393	1	s212	15.6	137.8	163	1.87	28.8	14.5	19	206	RF
9	35	394	1	s298	19.22	140.4	165	1.17	27.6	14.9	21	209	RF
9	36	395	1	s144	16.44	127.4	166	1.76	27.2	15.3	14	205	RF
9	37	396	1	s276	21.52	130.4	160	3.28	26.9	13.7	21	206	RF
9	38	397	1	Filler	17.59	119.4	164	2.22	35	15.1	19	209	RF
9	39	398	1	s294	18.73	106.4	161	1.79	28	15.1	19	206	RF
9	40	399	1	s121	16.28	113.4	161	2.29	31.8	14.3	19	205	RF
9	41	400	1	s83	17.77	100.4	163	1.95	37.3	15.6	17	208	RF
9	42	401	1	s295	19.62	129.8	159	2.26	25.4	16.2	23	204	RF
9	43	402	1	s241	19.79	131.4	158	3.14	25.5	14.7	19	206	RF
9	44	403	1	s216	19.74	138.8	160	2.47	30.7	16.3	21	205	RF
9	45	404	1	s228	18.21	129.2	159	1.9	31.5	15.7	22	205	RF
9	46	405	1	s95	17.57	115.6	159	0.83	31.1	16.3	23	206	RF
10	2	406	2	s272	28.27	123.8	155	2.85	25.3	14.3	15	201	RF
10	3	407	2	s56	19.47	130.8	158	2.1	28.3	15.5	23	206	RF
10	4	408	2	s309	17.53	108.6	155	2.24	33	15.9	18	205	RF
10	5	409	2	s357	16.73	116.2	151	1.99	30.1	17	17	202	RF
10	6	410	2	s169	21.04	116	157	2.07	29.5	15.4	22	205	RF
10	7	411	2	s119	18.43	118.4	160	2.54	33.5	15.7	21	206	RF
10	8	412	2	s78	18.76	106.4	159	1.89	32.4	15.9	14	204	RF
10	9	413	2	s83	18.67	80.6	163	1.92	34.4	16.5	15	204	RF
10	10	414	2	s264	17.02	95.4	162	0.61	28	16.3	13	202	RF
10	11	415	2	s227	14.66	127	161	2.12	28.8	15.3	19	204	RF
10	12	416	2	s430	13.23	112.2	164	2	34	17	17	205	RF
10	13	417	2	s97	18.13	120.8	161	1.42	27.5	15.9	12	204	RF
10	14	418	2	s313	28.78	127.6	157	1.44	23.6	14.3	16	203	RF
10	15	419	2	s356	15.61	136.4	164	1.64	37.8	16.7	15	202	RF
10	16	420	2	s230	17.21	125.4	163	1.6	28.5	17.4	19	206	RF
10	17	421	2	s301	15.35	146.4	160	2.02	26.5	16	22	204	RF
10	18	422	2	s279	21.17	138.2	162	2.16	30.4	15.8	23	207	RF
10	19	423	2	s90	18.44	125.4	163	2.54	34.8	15.6	17	207	RF
10	20	424	2	s239	20.95	134.4	160	2.58	27.7	16.1	18	205	RF
10	21	425	2	s347	15.48	99.2	164	0.44	29.7	16	8	199	RF
10	22	426	2	s139	16.79	128.8	166	1.79	31.9	15.4	21	210	RF
10	23	427	2	s269	16.74	115.4	163	1.17	25.2	16	16	205	RF
10	24	428	2	s84	18.51	112.4	163	1.54	34	15.5	15	206	RF
10	25	429	2	s235	17.09	129	162	2.76	28.2	15.1	16	205	RF
10	26	430	2	s91	20	117.2	161	1.51	31.5	15.6	16	206	RF
10	27	431	2	s297	23.6	176.4	167	2.26	25.8	14.7	18	207	RF
10	28	432	2	s41	16.87	128.2	161	3.73	30.5	13.8	21	209	RF
10	29	433	2	s284	20.53	132.2	161	3	23.7	15.1	18	203	RF
10	30	434	2	s359	19.59	127.8	159	2.24	29.4	16.2	16	204	RF
10	31	435	2	s417	13.33	120.4	163	1.15	38.5	16.5	17	205	RF
10	32	436	2	s161	24.34	136	161	3.26	28.1	14.4	18	204	RF
10	33	437	2	s416	17.31	99.4	163	0.41	32.5	15.6	18	205	RF
10	34	438	2	s273	26.33	148.6	158	4.49	25.3	14.1	19	204	RF
10	35	439	2	s275	19.58	134.2	158	2.75	27.1	14.3	20	205	RF
10	36	440	2	s143	16.28	129.8	164	2.05	31.4	15	20	210	RF
10	37	441	2	s395	16.4	114	164	1.85	32.9	16.2	18	210	RF
10	38	442	2	s72	15.88	110.8	163	1.55	38	14.9	17	209	RF
10	39	443	2	s49	17.8	133.6	165	3.37	28.3	15.9	17	207	RF
10	40	444	2	s104	19.21	128	161	2.03	27.7	16.4	19	205	RF
10	41	445	2	s290	16.67	123.8	161	2.49	32.6	16.8	21	207	RF
10	42	446	2	s240	21.28	130.4	160	1.99	28.4	15	20	206	RF
10	43	447	2	s288	17.38	96.6	159	1.32	23.9	16.3	15	200	RF
10	44	448	2	s174	16.09	120	160	3.12	34.5	16.1	22	208	RF
10	45	449	2	s156	26.69	134	158	2.14	27	14.3	19	205	RF
10	46	450	2	s101	17.79	103.6	159	1.59	31.2	16.3	20	201	RF
11	2	451	2	s432	17.79	124.4	159	3.44	37.2	16.1	23	209	RF
11	3	452	2	s354	18.82	118.4	158	4.16	32.1	15.6	21	206	RF
11	4	453	2	s328	18.05	119.8	154	1.57	24.7	16.7	16	196	RF
11	5	454	2	s304	17.96	128.8	160	4.38	28.1	16.3	20	207	RF
11	6	455	2	s207	26.3	117	160	2.51	29	15.3	19	207	RF
11	7	456	2	s282	18.33	124	155	2.95	32.2	15.2	19	205	RF
11	8	457	2	s369	14.78	121.2	161	2.3	32.8	16.4	24	208	RF
11	9	458	2	s362	22.58	148	155	3.39	31.3	15.7	23	205	RF
11	10	459	2	s45	22.08	125	159	3.15	28	14.6	20	203	RF
11	11	460	2	s92	15.97	121.4	160	2.46	32.5	16.5	17	202	RF
11	12	461	2	s325	20.54	121	157	1.78	25.1	17.2	19	201	RF
11	13	462	2	s363	14.66	113	161	2.15	34.4	17	17	206	RF
11	14	463	2	s255	23.01	91.2	163	0.34	25.7	16.1	7	196	RF
11	15	464	2	s426	16.55	117.4	163	1.77	37	16.4	16	207	RF
11	16	465	2	s387	16.43	121	160	2.8	32.2	16.7	22	205	RF
11	17	466	2	s86	18.45	133.4	160	2.41	28.8	16	17	205	RF
11	18	467	2	s397	18.83	138.4	160	2.91	31.6	16.7	19	204	RF
11	19	468	2	s199	15.3	107.2	163	2.29	33.5	17.9	14	206	RF
11	20	469	2	s373	15.24	120.4	163	2.22	37.6	16.5	17	207	RF
11	21	470	2	s360	16.02	123.2	163	1.43	30.6	16.8	13	205	RF
11	22	471	2	s241	20.6	130	160	3.03	24.6	13.8	17	205	RF
11	23	472	2	s320	16.09	99.4	161	0.55	27.7	16.7	16	206	RF
11	24	473	2	s382	18.14	149.8	161	2.85	29.3	15.8	21	207	RF
11	25	474	2	s127	22.73	126.4	161	2.88	30.9	16.6	20	208	RF
11	26	475	2	s296	16.48	156.4	167	1.9	30.5	16.8	18	208	RF
11	27	476	2	s384	17.69	131.4	163	2.84	31.5	15.5	18	207	RF
11	28	477	2	s134	18.27	124.2	162	2.75	32.4	15.7	16	206	RF
11	29	478	2	s398	18.43	153.2	159	3.22	30.2	15.7	26	208	RF
11	30	479	2	s399	12.75	136.6	164	2.6	32.3	17.6	20	207	RF
11	31	480	2	s340	20.14	147.6	163	4.46	29.2	15.4	18	206	RF
11	32	481	2	s343	21.17	106.6	157	2.71	28.9	15.1	18	205	RF
11	33	482	2	s209	19.6	130.8	160	2.19	26.5	15.1	19	205	RF
11	34	483	2	s142	19.44	129	163	2.96	30.7	16.4	19	208	RF
11	35	484	2	s162	16.55	120.6	162	2.64	31.5	16.4	20	206	RF
11	36	485	2	s220	17.81	121.4	159	2.27	27.5	16.8	18	206	RF
11	37	486	2	s361	20.43	108.6	161	2.49	30.4	15.8	18	205	RF
11	38	487	2	s95	18.28	125.6	161	3.51	31.5	15.9	21	206	RF
11	39	488	2	s405	16.22	145	161	3.42	28.8	15.8	21	205	RF
11	40	489	2	s82	16.2	123.4	164	2.26	38.3	15.9	15	208	RF
11	41	490	2	s308	18.18	98.2	161	1.17	31.5	16.2	17	206	RF
11	42	491	2	s268	25.08	123	159	2.29	27.8	15.5	19	207	RF
11	43	492	2	s409	17.62	132.6	159	3.4	36.8	15.8	18	205	RF
11	44	493	2	s196	16.85	124.4	159	3.12	36.4	15.4	17	206	RF
11	45	494	2	s129	17.71	130.4	155	2.77	35.2	15.7	21	205	RF
11	46	495	2	s158	17.72	143.8	161	2.72	28	15	20	204	RF
12	2	496	2	s211	19.09	141.2	162	2.44	28.1	15	20	207	RF
12	3	497	2	s53	16.83	148	161	3.72	28.5	15.4	22	208	RF
12	4	498	2	Filler	18.15	126.8	160	2.11	36	16.5	22	208	RF
12	5	499	2	s389	27.53	129.4	160	3.42	31.9	16.6	22	208	RF
12	6	500	2	s100	23.33	145	158	3.69	26.7	15.9	20	207	RF
12	7	501	2	s286	25.57	131.4	159	2.7	24.2	15.1	21	206	RF
12	8	502	2	s121	17.38	112	150	2.68	29.1	16.1	30	204	RF
12	9	503	2	s337	28.05	151.6	159	4	27.5	15.1	19	205	RF
12	10	504	2	Filler	16.95	117	163	1.05	36.6	16.5	19	208	RF
12	11	505	2	s138	18.65	119.2	160	2.76	34.4	15.8	17	206	RF
12	12	506	2	s298	20.37	137	162	2.65	27.1	16.1	24	207	RF
12	13	507	2	s60	12.97	107.8	163	0.77	38.3	19.5	18	207	RF
12	14	508	2	s140	16.13	121.2	163	1.84	31.4	16.2	18	206	RF
12	15	509	2	s242	18.64	124	163	3.3	29.3	15.8	18	208	RF
12	16	510	2	s385	14.9	144.4	162	2.26	32	16.2	18	206	RF
12	17	511	2	s418	14.71	123.8	165	2.14	36.2	16.9	15	206	RF
12	18	512	2	s58	18.37	146.4	162	2.16	28.1	16.2	20	207	RF
12	19	513	2	s274	15.41	137.8	168	2.88	29.6	15.7	15	209	RF
12	20	514	2	s151	23.13	115.6	164	3.35	29	17.4	18	208	RF
12	21	515	2	s336	27.83	120.8	161	3.65	26.4	15.7	18	206	RF
12	22	516	2	s64	19.48	123.2	163	2.93	33.1	15.4	16	208	RF
12	23	517	2	s386	18.48	149.8	168	2.53	27.5	16.5	21	210	RF
12	24	518	2	s180	27.88	141	162	3.47	25.5	14.2	18	206	RF
12	25	519	2	s285	22.04	134.6	161	2.77	25.4	14.8	18	205	RF
12	26	520	2	s226	14.41	121.2	162	1.68	26.2	16	18	203	RF
12	27	521	2	s154	19.83	132.8	164	3.28	26.4	16.4	17	208	RF
12	28	522	2	s390	13.99	125.4	167	1.89	34	16.5	16	209	RF
12	29	523	2	s149	17.75	147	161	2.66	30.3	15.8	20	208	RF
12	30	524	2	s364	22.19	136.6	162	4.07	33.6	15.9	20	209	RF
12	31	525	2	s19	24.94	138.4	161	4.58	28	14.8	20	207	RF
12	32	526	2	s136	17.14	123.2	163	2.81	35.9	15.6	17	207	RF
12	33	527	2	s413	20.74	133	162	3.3	35.8	15.4	19	207	RF
12	34	528	2	s71	17.39	119.8	162	1.24	35.6	15.3	17	208	RF
12	35	529	2	s355	18.04	130.6	163	3.65	34.3	15.8	14	207	RF
12	36	530	2	s165	24.3	153	161	3.94	29.7	14.8	21	207	RF
12	37	531	2	s379	16.24	122.6	163	3.7	32.6	16.7	20	208	RF
12	38	532	2	Filler	17.03	121	164	1.76	36.3	15.5	19	208	RF
12	39	533	2	s231	16.66	132.8	161	1.67	27.4	15.2	20	203	RF
12	40	534	2	s270	24.24	140.4	158	3.61	25.5	15.4	21	205	RF
12	41	535	2	s332	19.93	117.8	162	2.14	32.5	15.3	18	206	RF
12	42	536	2	s85	15.7	129.2	158	2.38	33.9	15.8	20	206	RF
12	43	537	2	s153	19.26	154.6	160	3.76	26.3	15.7	22	208	RF
12	44	538	2	s323	22.94	120.4	161	2.07	29.7	15.3	17	206	RF
12	45	539	2	s267	19.33	110.6	158	1.52	26.4	15.6	18	203	RF
12	46	540	2	s289	18.55	132.4	158	2.4	27.6	15.5	24	204	RF
13	2	541	2	s197	19.88	122.2	160	2.37	32.3	15.5	22	208	RF
13	3	542	2	s314	19.91	106.2	156	2.72	28.5	15	17	201	RF
13	4	543	2	s221	22.96	112.2	157	2.58	30.3	14.6	23	205	RF
13	5	544	2	s12	20.79	82.8	163	1.36	29	16	17	206	RF
13	6	545	2	s185	24.38	122	155	2.91	24.8	14.5	17	203	RF
13	7	546	2	s433	17.91	109	160	2.3	31.1	15.2	16	204	RF
13	8	547	2	s358	15.43	135	159	3.05	36.6	15.9	19	201	RF
13	9	548	2	s168	14.03	101.4	160	0.3	31.9	19.8	21	203	RF
13	10	549	2	s407	21.11	101.6	165	2.32	32.5	14.9	15	205	RF
13	11	550	2	s341	15.8	111.2	160	1.55	25.1	17	17	202	RF
13	12	551	2	s302	20.17	143.4	156	2.2	27.7	15	24	201	RF
13	13	552	2	s77	17.14	115.2	160	1.79	33.6	16.3	17	205	RF
13	14	553	2	s147	15.95	124.2	161	1.86	30.4	16.9	21	206	RF
13	15	554	2	s94	18.58	124.2	157	2.14	28.8	15.4	22	205	RF
13	16	555	2	s216	18.14	119	163	1.31	30	16.3	18	205	RF
13	17	556	2	s400	16.73	119	163	2.52	30.3	16.1	21	207	RF
13	18	557	2	s184	17.92	129	163	0.82	32.2	15.8	18	206	RF
13	19	558	2	s250	18.79	86.2	163	1.27	28.7	15.5	14	205	RF
13	20	559	2	s370	16.64	125.2	163	1.91	33.8	14.7	18	209	RF
13	21	560	2	s30	25.54	131.4	161	1.74	27.2	14.9	17	204	RF
13	22	561	2	s224	16.41	122.8	162	1.87	26.3	15.8	15	201	RF
13	23	562	2	s210	12.34	124.4	161	1.93	28.5	16	19	201	RF
13	24	563	2	s424	23.15	120.6	161	2.48	29.5	15	18	206	RF
13	25	564	2	s348	16.7	98.4	163	0.94	27.4	16	12	204	RF
13	26	565	2	s144	25.67	128	159	1.94	27.1	15.5	15	204	RF
13	27	566	2	s31	24.3	110.8	163	1.56	29.3	15	17	205	RF
13	28	567	2	s306	29.14	122.6	156	3.12	25.9	14.5	21	204	RF
13	29	568	2	s278	17.61	133.2	159	1.57	29.4	15.5	21	200	RF
13	30	569	2	s254	19.29	88.8	165	0.16	28.5	16	8	200	RF
13	31	570	2	Filler	17.15	119.2	163	1.54	36	15.4	19	206	RF
13	32	571	2	s222	19.49	116.8	163	2.35	29.1	15.9	16	203	RF
13	33	572	2	s18	17.56	119.6	162	2.63	24.6	14.7	17	201	RF
13	34	573	2	s372	12.87	103	163	1.48	37.4	16.3	23	205	RF
13	35	574	2	s188	25.21	121.4	159	1.07	29	15.5	21	204	RF
13	36	575	2	s74	24.91	112.4	161	0.71	31.3	15.2	15	204	RF
13	37	576	2	s366	17.12	95	163	1.23	36.7	16.4	18	209	RF
13	38	577	2	s334	27.13	134.6	158	2.49	27	14.5	19	204	RF
13	39	578	2	s47	17.2	137	162	2.97	30.5	15.4	25	210	RF
13	40	579	2	s50	18.81	131.4	163	2.99	27.4	15.8	21	205	RF
13	41	580	2	s402	18.74	131.4	163	3.61	29.7	14.8	19	209	RF
13	42	581	2	s111	13.01	104	161	1.46	35.4	17.1	23	206	RF
13	43	582	2	s52	16.95	139	159	3.29	31.7	16.2	22	206	RF
13	44	583	2	s421	17.93	120.8	160	2.55	31.2	16.4	21	207	RF
13	45	584	2	s419	18.48	127.8	158	3.71	39.5	15.6	21	207	RF
13	46	585	2	s87	18.23	126.8	156	3.93	32.4	15.4	21	205	RF
14	2	586	2	s157	20.93	122.2	159	1.85	30.8	15.9	23	208	RF
14	3	587	2	s262	18.09	86	152	0.5	26.8	15.3	12	200	RF
14	4	588	2	s380	18.84	104.6	154	1.33	34.8	15.4	21	205	RF
14	5	589	2	s324	21.86	99.2	155	0.68	26.2	15.9	17	203	RF
14	6	590	2	s244	24.4	103.4	156	1.1	28.2	15.8	18	205	RF
14	7	591	2	s260	20.87	108.6	156	0.87	29.2	16	11	202	RF
14	8	592	2	s388	18.36	116.6	159	2.87	34.5	15.7	18	205	RF
14	9	593	2	s420	20.79	111.8	160	2.44	29	15.8	17	206	RF
14	10	594	2	s319	15.3	115.8	160	1.49	24.5	15.1	18	203	RF
14	11	595	2	s393	13.8	120.4	161	2.11	33.4	15.4	21	206	RF
14	12	596	2	s300	19.59	154.6	160	2.05	27.7	14.7	21	202	RF
14	13	597	2	s429	17.98	110.8	162	1.29	32.4	15.8	17	206	RF
14	14	598	2	s164	19.38	110.4	161	1.09	31.6	15.5	18	206	RF
14	15	599	2	s431	16	105.8	165	0.96	37.2	18.2	15	208	RF
14	16	600	2	s125	24.6	120.4	161	1.72	30	15.3	17	207	RF
14	17	601	2	s251	15.55	114.4	161	1.19	27.5	15.5	19	205	RF
14	18	602	2	s63	16.48	107.6	165	1.26	31.8	15.9	11	206	RF
14	19	603	2	s57	17.64	118.6	165	1.69	32.3	14.7	17	206	RF
14	20	604	2	s339	17.03	122	163	1.82	27.7	16.5	18	205	RF
14	21	605	2	s234	17.18	116.4	166	1.34	26.7	15.3	14	201	RF
14	22	606	2	s303	18.48	113.8	166	1.65	31.4	16	14	208	RF
14	23	607	2	s371	16.42	116.2	168	1.93	31	14.5	21	210	RF
14	24	608	2	s257	20.4	115.2	164	0.72	26.7	15.8	11	203	RF
14	25	609	2	s117	21.71	113.8	166	0.9	30	15.5	13	206	RF
14	26	610	2	s368	17.72	116.8	163	1.43	33.4	15.3	17	206	RF
14	27	611	2	s265	21.04	94.4	167	0.09	29.7	14.3	6	196	RF
14	28	612	2	s261	22.44	84.6	167	0.21	26.8	15	6	201	RF
14	29	613	2	s252	19.71	110	165	1.27	31.8	15.4	15	205	RF
14	30	614	2	s108	19.43	120	163	1.75	33.3	15.5	14	206	RF
14	31	615	2	s293	18.54	103.6	163	0.92	27	15.7	13	205	RF
14	32	616	2	s333	20.29	133.8	159	2.04	25.6	15.4	22	204	RF
14	33	617	2	s367	17.54	112.2	163	1.77	33.9	15.5	19	208	RF
14	34	618	2	s225	14.98	109.6	166	1.63	29.3	14.7	15	203	RF
14	35	619	2	s263	15.52	90.4	162	0.61	28.7	15.5	13	205	RF
14	36	620	2	s130	15.35	115.6	161	1.99	38.2	15.6	16	205	RF
14	37	621	2	s118	17.07	112.6	165	1.42	31.6	16.3	15	205	RF
14	38	622	2	s75	20.53	131.4	158	2.85	33.6	14.9	21	206	RF
14	39	623	2	s194	17.64	121.2	161	2.4	32.4	15.2	19	206	RF
14	40	624	2	s256	19.85	100.6	160	0.62	26.1	16	15	201	RF
14	41	625	2	s425	18.13	105.4	163	3.5	31.4	16.2	18	207	RF
14	42	626	2	s98	16.84	125.2	161	2.4	31.5	16.3	20	205	RF
14	43	627	2	s186	16.54	144.2	160	2.36	30.4	15.7	21	208	RF
14	44	628	2	s76	19.56	115.4	161	2.18	37.4	15.4	16	208	RF
14	45	629	2	s228	18.52	140.2	158	2.93	30.8	15.2	21	204	RF
14	46	630	2	s394	17.91	144.8	159	3.05	32	17.1	24	208	RF
15	2	631	2	s377	16.51	119.2	155	2.22	31.5	16.3	22	204	RF
15	3	632	2	s190	17.93	122.4	156	1.36	35.5	14.9	21	202	RF
15	4	633	2	s204	27.65	114	157	2.46	29	15.1	18	205	RF
15	5	634	2	s51	17.44	123	159	2.22	30.1	14.4	21	201	RF
15	6	635	2	s331	14.91	112.2	158	1.66	25.5	13.5	19	200	RF
15	7	636	2	s159	16.43	114.6	161	1.04	33.1	17.3	17	201	RF
15	8	637	2	s410	16.42	134.6	167	2.99	29.4	15.7	16	207	RF
15	9	638	2	s191	16.92	115.4	161	1.89	38.7	15.1	18	206	RF
15	10	639	2	s294	18.06	87.4	162	1.07	26.4	15.3	15	201	RF
15	11	640	2	s412	17.32	102.6	164	1.49	31.5	15	18	206	RF
15	12	641	2	s245	18.17	111	159	1.84	25.7	14.9	20	203	RF
15	13	642	2	s192	15.6	112.4	160	1.64	42	14.2	21	207	RF
15	14	643	2	s73	19.82	94	164	0.74	32.1	15.7	15	206	RF
15	15	644	2	s114	26.75	118.4	157	1.44	29	14.4	16	202	RF
15	16	645	2	s318	15.76	110.8	166	1.4	32.1	15.9	16	205	RF
15	17	646	2	s344	18.04	108.2	164	1.83	32.4	15.7	14	206	RF
15	18	647	2	s396	16.78	120.8	161	2.13	33.9	15.4	20	207	RF
15	19	648	2	s198	20.31	111.8	164	1.53	29.2	15.3	16	206	RF
15	20	649	2	s218	16.82	110.2	162	0.66	26.1	16.7	17	200	RF
15	21	650	2	s310	16.12	108	164	6.54	28.9	15.4	15	203	RF
15	22	651	2	s131	18.04	113.4	165	1.1	33	14.8	13	205	RF
15	23	652	2	s43	25.23	101	164	0.73	24.9	15.7	11	203	RF
15	24	653	2	s229	20.28	108	165	0.84	27.9	15.1	11	204	RF
15	25	654	2	s223	14.89	129.8	159	1.09	26.2	14.2	20	203	RF
15	26	655	2	s243	19.89	96.6	164	0.79	27.7	15.7	13	205	RF
15	27	656	2	s155	19.56	119.6	163	1.43	32.9	15.9	19	208	RF
15	28	657	2	s137	18.88	127.4	163	2.23	31.2	15.4	23	210	RF
15	29	658	2	s110	17.29	104.4	151	0.88	30.1	15.5	26	200	RF
15	30	659	2	s292	16.86	107.6	162	0.96	25.2	16	17	202	RF
15	31	660	2	s353	20.91	107.4	164	0.66	25.7	15.3	13	205	RF
15	32	661	2	s93	19.15	114.4	165	1.83	30.4	14.9	12	206	RF
15	33	662	2	s236	17.83	118.2	162	2.11	24.5	14.8	17	204	RF
15	34	663	2	s132	17.44	113	164	1.85	37.2	14.5	15	207	RF
15	35	664	2	s317	21.62	117.2	167	1.85	27.9	14.9	14	204	RF
15	36	665	2	s375	13.41	110.8	162	1.57	35.8	14.4	21	206	RF
15	37	666	2	s321	20.96	133.4	158	1.88	28.1	15.5	21	203	RF
15	38	667	2	s312	23.55	147	159	2.13	28.8	14.6	25	206	RF
15	39	668	2	s124	18.72	117.6	162	1.98	31.7	15.3	14	206	RF
15	40	669	2	s316	19.02	121	162	2.1	29.7	16.6	16	202	RF
15	41	670	2	s135	17.65	142.4	160	3.34	33.6	16.3	21	206	RF
15	42	671	2	s173	12.61	108.6	159	1.71	40.8	16.9	19	206	RF
15	43	672	2	s183	15.88	142.2	160	2.84	31.3	15.7	22	205	RF
15	44	673	2	s170	15.79	128.4	161	3.06	39.8	15.7	19	207	RF
15	45	674	2	s123	21.4	132	156	2.58	34.8	15.4	20	204	RF
15	46	675	2	s148	15.83	148.6	159	2.9	28.5	16.5	25	205	RF
16	2	676	2	s214	20.28	105.6	154	1.4	26.5	15.7	18	204	RF
16	3	677	2	s70	18.3	98.2	156	1.02	35.3	15	19	205	RF
16	4	678	2	Filler	18.86	113.4	160	0.77	35.4	15.3	21	206	RF
16	5	679	2	s329	15.86	88.4	160	1.04	27	15.7	15	200	RF
16	6	680	2	s248	26.51	103.8	160	1.2	25.8	15	17	204	RF
16	7	681	2	s338	19.51	123.4	153	2.87	28	15	19	202	RF
16	8	682	2	s237	16.24	121	157	2.08	29.3	15.3	21	203	RF
16	9	683	2	s160	19.1	128.8	161	1.02	32.4	14.1	22	207	RF
16	10	684	2	s305	24.32	119.4	154	2.31	26.8	14.8	23	203	RF
16	11	685	2	s307	22.29	101.6	160	0.62	27.9	15	15	201	RF
16	12	686	2	s66	21	116	158	2.4	31.2	14.4	18	204	RF
16	13	687	2	s281	23.85	125.2	160	2.76	28.8	13.5	21	208	RF
16	14	688	2	s88	19.13	100.4	164	1.77	32.7	15.6	15	208	RF
16	15	689	2	s391	16.42	113	160	1.54	33.8	15.4	20	206	RF
16	16	690	2	s383	19.15	103.4	162	1.52	31.1	15.5	19	208	RF
16	17	691	2	s276	19.16	108.6	164	1.3	27.1	14.4	15	206	RF
16	18	692	2	s415	19.4	114	164	0.62	36.2	14.9	17	208	RF
16	19	693	2	s376	16.08	102	163	0.82	34.9	15.1	20	206	RF
16	20	694	2	s327	22.63	113	161	0.88	26	15.7	18	205	RF
16	21	695	2	s205	22.97	102.4	165	1.2	26.2	14.9	15	207	RF
16	22	696	2	s179	21.43	86.6	167	1.19	26.9	14.7	13	206	RF
16	23	697	2	s166	14.75	111.2	164	0.72	34	15.5	16	207	RF
16	24	698	2	s427	17.06	101.2	166	1.03	32.4	15.2	12	206	RF
16	25	699	2	s322	18.85	114.8	163	0.74	29.6	15.2	14	206	RF
16	26	700	2	s350	17.36	98.2	163	0.49	28.1	15.9	13	205	RF
16	27	701	2	s406	17.03	116	167	1.28	30.4	15.5	15	210	RF
16	28	702	2	s277	14.69	102.4	163	1.08	26.7	15	15	203	RF
16	29	703	2	s238	17.34	133.8	162	2.35	29.1	14.8	20	210	RF
16	30	704	2	s178	18.37	134.6	165	0.59	30.6	14	18	210	RF
16	31	705	2	s122	22.18	109	163	1.49	28.7	14.7	17	205	RF
16	32	706	2	s258	16.96	107	162	0.72	28	16.8	13	206	RF
16	33	707	2	s112	19.24	111.2	164	1.53	25.2	14.9	16	205	RF
16	34	708	2	s315	21.61	117.4	163	0.89	31.2	15	17	205	RF
16	35	709	2	s102	18.8	138.8	159	1.99	30.8	14.5	21	205	RF
16	36	710	2	s109	20.17	123.8	162	1.34	33.4	14.5	19	208	RF
16	37	711	2	s351	17.13	102	163	0.92	30.6	15.5	15	204	RF
16	38	712	2	s163	17.51	149.4	166	1.2	30.4	15	21	208	RF
16	39	713	2	s215	19.48	121.8	162	3.27	31.1	15.9	18	207	RF
16	40	714	2	s106	22.3	119	161	2.11	27.9	15.3	19	207	RF
16	41	715	2	s408	24.95	131	160	3.18	31.8	15.3	21	207	RF
16	42	716	2	s422	15.87	116.6	160	1.53	31.2	15.3	18	205	RF
16	43	717	2	s99	23.63	142.8	160	3.99	28.2	15.6	23	207	RF
16	44	718	2	s411	21.32	134.4	155	4.08	35.5	15.4	22	207	RF
16	45	719	2	s212	16.67	139.4	159	2.53	27.8	15.1	23	203	RF
16	46	720	2	s346	15.7	123.6	156	1.51	28.2	17.8	18	200	RF
17	2	721	2	s195	18.41	96.6	159	1.59	35.1	14.7	18	206	RF
17	3	722	2	s403	15.61	112	158	1.36	30.8	15.1	25	206	RF
17	4	723	2	s335	21.03	104.6	150	1.97	27.4	14.8	21	201	RF
17	5	724	2	s217	17.91	97.4	154	1.1	27.2	15.6	18	200	RF
17	6	725	2	s365	16.55	106	158	1.95	38.2	15.5	20	204	RF
17	7	726	2	s96	23.34	104	155	1.75	28	14.8	18	202	RF
17	8	727	2	s206	24.88	110.2	156	2.79	26.4	14.8	23	204	RF
17	9	728	2	s113	20.3	105.8	156	2.22	27.9	15.3	23	203	RF
17	10	729	2	s79	19.93	88.6	162	1.57	31.9	15.3	14	206	RF
17	11	730	2	s133	20.87	111.2	161	2.71	34.3	14.3	17	205	RF
17	12	731	2	s182	18.45	133	161	1.79	32.5	14.9	21	207	RF
17	13	732	2	s404	20.53	136.8	160	2.18	30.9	14.6	25	207	RF
17	14	733	2	Filler	17.44	103.2	162	0.84	36.7	15.5	20	208	RF
17	15	734	2	s128	17.88	106	164	1.33	30.8	15.4	18	207	RF
17	16	735	2	s280	15.95	117	160	2.48	28.7	14.5	21	204	RF
17	17	736	2	s299	22.37	114.4	158	1.01	26.8	14.5	19	203	RF
17	18	737	2	s55	19.47	102	165	1.54	32.2	14.9	16	206	RF
17	19	738	2	s345	19.56	100.2	165	1.22	34.2	15.2	12	207	RF
17	20	739	2	s374	18.64	113.8	162	0.75	33.1	15.5	20	208	RF
17	21	740	2	s271	31.07	112.2	159	1.53	24.7	14.4	18	206	RF
17	22	741	2	s247	16.63	91.6	165	0.51	31.9	14.8	8	202	RF
17	23	742	2	s253	17.59	101	162	0.82	27.5	15.4	15	204	RF
17	24	743	2	s311	13.98	108.8	167	1.82	30.9	15.5	15	206	RF
17	25	744	2	s65	22.34	114	160	0.65	30.8	14.9	17	205	RF
17	26	745	2	s69	22.21	122.8	162	1.93	30.1	15.7	19	208	RF
17	27	746	2	s200	20.78	114.2	162	1.96	33.8	14.9	19	208	RF
17	28	747	2	s423	16.32	81.8	161	0.81	25.4	16.1	13	201	RF
17	29	748	2	s81	18.8	74.2	168	1.54	37	14.9	11	208	RF
17	30	749	2	s105	15.28	125.8	159	1.42	27.5	14.1	19	203	RF
17	31	750	2	s80	19.95	105.2	164	1.17	35.5	15.1	13	206	RF
17	32	751	2	s330	16.1	129.4	164	1.1	27.6	15.5	19	203	RF
17	33	752	2	Filler	17.48	109.4	164	0.76	36.6	15.3	18	207	RF
17	34	753	2	s175	13.72	112.2	165	1.56	38.8	13.6	16	206	RF
17	35	754	2	s392	15.29	125.8	162	2.33	31.9	14.3	25	207	RF
17	36	755	2	s342	22.35	116.2	162	2.29	28.6	14.6	18	206	RF
17	37	756	2	s414	18.75	107.6	160	1.52	30.2	15.2	15	205	RF
17	38	757	2	s428	19.25	119.8	162	3.89	32.4	13.7	19	208	RF
17	39	758	2	s176	14.05	122.4	159	2.22	39.4	15.2	23	206	RF
17	40	759	2	s378	18.95	122.8	160	4.11	32.2	15.9	21	206	RF
17	41	760	2	s115	24.89	135.8	159	3.64	26.8	14.5	17	203	RF
17	42	761	2	s326	19.79	124	156	2.17	27.8	16.3	21	202	RF
17	43	762	2	s246	18.05	107.8	158	1.68	29.7	15.5	20	201	RF
17	44	763	2	s259	19.56	105	160	2.72	32.9	16.3	20	207	RF
17	45	764	2	s145	15.53	124.8	163	3.5	31.4	14.8	22	207	RF
17	46	765	2	s249	20.73	105.4	154	1.13	30.5	15.6	16	200	RF
18	2	766	3	s149	19.44	136.2	154	3.47	28.7	14.8	25	207	RF
18	3	767	3	s18	18.54	109	154	1.92	25.6	14.1	17	201	RF
18	4	768	3	s377	17.49	113.2	155	2.06	31.5	16.2	22	204	RF
18	5	769	3	s102	19.49	125	155	2.57	29.6	14.9	23	203	RF
18	6	770	3	s276	19.61	114.6	156	1.7	27.1	14.1	22	203	RF
18	7	771	3	s186	18.02	138	158	1.98	30.6	15.2	22	207	RF
18	8	772	3	s215	20.79	112.2	157	2.99	30.2	15.6	21	205	RF
18	9	773	3	s280	16.57	121.6	159	2.45	28.6	14.9	24	205	RF
18	10	774	3	s84	18.75	107.8	160	1.42	36.9	14.6	17	208	RF
18	11	775	3	s253	20.39	102.2	157	1.57	29.6	14.9	19	201	RF
18	12	776	3	s329	15.87	87.8	162	1.26	28.1	15.1	13	200	RF
18	13	777	3	s250	20.49	96	164	1.76	29.2	14.8	19	205	RF
18	14	778	3	s174	15.89	108	163	1.79	34.5	16.2	18	207	RF
18	15	779	3	s425	14.13	99	165	1.42	38.9	15.5	16	204	RF
18	16	780	3	s93	18.16	108.8	164	1.79	31	15.5	13	205	RF
18	17	781	3	s311	13.41	116	165	1.31	32.2	15.9	17	205	RF
18	18	782	3	s414	19.56	101.4	162	0.69	29.3	15.8	15	206	RF
18	19	783	3	s57	18.19	118.4	165	1.59	32.9	15.7	15	207	RF
18	20	784	3	s319	15.42	107.8	165	0.94	26	16.8	14	203	RF
18	21	785	3	s431	16.17	102.4	165	0.52	37.3	18.4	15	208	RF
18	22	786	3	s267	18.68	99.6	162	0.54	24	15.5	16	203	RF
18	23	787	3	s307	21.28	106.6	164	0.7	28.2	15.5	12	203	RF
18	24	788	3	s289	16.93	119.6	163	2.23	28.7	15.1	18	204	RF
18	25	789	3	s353	28.27	100	164	0.41	27.2	15.4	13	205	RF
18	26	790	3	s158	19.29	126.4	163	0.42	28.4	14.5	18	206	RF
18	27	791	3	s165	26.83	136	156	2.01	28.5	14.4	22	204	RF
18	28	792	3	s338	20.83	125	155	2.87	28.1	14.5	18	203	RF
18	29	793	3	s433	18.24	111.6	166	1.44	33	14.4	12	206	RF
18	30	794	3	s277	13.85	115.6	159	1.76	27	13.9	20	204	RF
18	31	795	3	s361	21.33	105.2	163	1.51	31.6	14.5	15	206	RF
18	32	796	3	s423	16.14	85.2	162	0.93	26	15.9	12	202	RF
18	33	797	3	s76	23.66	112.6	164	1.47	32.3	14.6	12	206	RF
18	34	798	3	s164	18.89	111	162	1.58	32.7	14.8	17	206	RF
18	35	799	3	s127	20.48	117.6	162	1.93	32.3	15.1	19	208	RF
18	36	800	3	s129	20.12	132.4	156	1.72	33.4	15.2	24	206	RF
18	37	801	3	s95	18.4	122.4	161	2.53	29.6	14.8	20	206	RF
18	38	802	3	s80	19.08	117.6	160	2.34	35.4	14.5	18	207	RF
18	39	803	3	s333	21.75	140	159	2.93	27.8	15.1	23	206	RF
18	40	804	3	s155	20.92	135.6	160	3.29	31.6	15.8	21	209	RF
18	41	805	3	s273	14.72	154.6	157	2.82	29.9	17.4	19	203	RF
18	42	806	3	s379	16.46	120.4	158	3.26	32.2	16.6	22	207	RF
18	43	807	3	s371	17.43	134.6	160	3.49	30.9	15.6	27	210	RF
18	44	808	3	s252	20.43	112.6	158	2.4	30.8	15.7	19	206	RF
18	45	809	3	s420	20.62	124.2	159	3.24	31.1	15.9	18	207	RF
18	46	810	3	s221	22.62	130.8	157	3.71	31.8	14.8	23	207	RF
19	2	811	3	s351	18.92	96.4	154	2.5	28.4	15.8	17	203	RF
19	3	812	3	s262	17.22	89.4	154	0.53	26	15.3	10	199	RF
19	4	813	3	s99	24.96	123.6	154	2.61	27.3	14.7	26	204	RF
19	5	814	3	s135	19.37	129.2	156	2.81	30.6	15.1	22	200	RF
19	6	815	3	s96	22.54	116.4	155	2.21	29.3	15.1	17	199	RF
19	7	816	3	s350	20.72	100.4	158	0.73	26.7	16	13	201	RF
19	8	817	3	s301	18.22	138.2	159	1.54	26.5	15.7	24	202	RF
19	9	818	3	s344	18.76	116.2	155	2.37	31.8	14.9	20	203	RF
19	10	819	3	s173	13.59	96.6	160	1.5	39.6	14.4	18	205	RF
19	11	820	3	s217	18.19	96.8	157	1.01	27.5	15.4	20	199	RF
19	12	821	3	s331	14.89	113.2	159	1.76	25.5	13.1	19	196	RF
19	13	822	3	s400	17.73	119.8	161	2.28	30	14.2	24	208	RF
19	14	823	3	s432	16.69	108.4	164	1.34	38	15.4	18	208	RF
19	15	824	3	s86	19.22	122.8	155	2.16	29.1	14.8	20	205	RF
19	16	825	3	s106	21.4	115.4	160	1.48	28.2	14.1	20	206	RF
19	17	826	3	s285	21.45	125.6	156	1.97	27	13.7	21	205	RF
19	18	827	3	s299	22.06	121.8	158	0.82	27.6	14.7	21	204	RF
19	19	828	3	s336	25.27	115.4	160	1.59	26.6	15.6	17	204	RF
19	20	829	3	s342	18.97	109	162	1.77	27.5	17	17	205	RF
19	21	830	3	s228	20.29	119.4	160	1.55	29.4	14.9	18	203	RF
19	22	831	3	s245	18.35	108.8	161	1.36	25	15.6	18	201	RF
19	23	832	3	s77	18.29	114.6	163	1.67	35.9	15.6	16	205	RF
19	24	833	3	s137	19.79	120.2	163	2.28	31.5	15.2	23	210	RF
19	25	834	3	s397	18.19	113.4	158	1.53	30.5	15.1	23	206	RF
19	26	835	3	s115	22.17	117.8	161	1.57	30.1	15.3	18	207	RF
19	27	836	3	s31	23	112.6	160	2.2	30.7	14.6	21	207	RF
19	28	837	3	s112	19.22	111	163	2.27	26.5	13.8	18	206	RF
19	29	838	3	s43	25.91	106.2	162	1.17	24.6	14.7	14	205	RF
19	30	839	3	s259	18.18	95.2	165	1.61	31.4	15.6	14	206	RF
19	31	840	3	s290	16.48	104.2	164	1.47	33	15.2	16	208	RF
19	32	841	3	s303	17.39	118.8	161	2.2	31.3	15.6	18	205	RF
19	33	842	3	s247	18.91	93.8	162	0.57	31.3	16.3	10	200	RF
19	34	843	3	Filler	17.37	106.8	161	1.19	31.5	15.5	20	207	RF
19	35	844	3	s82	19.89	66	165	1.9	36.4	14.3	14	208	RF
19	36	845	3	s375	13.56	109	164	1.42	33.8	14.7	19	206	RF
19	37	846	3	s153	19.73	151.2	157	3.08	26.9	14.8	24	207	RF
19	38	847	3	s65	21.43	122.8	156	2.38	30	14.5	19	206	RF
19	39	848	3	s348	16.94	103.8	160	2.09	27.7	15.9	15	200	RF
19	40	849	3	s407	20.19	117.6	162	2.42	33.1	14.7	16	205	RF
19	41	850	3	s274	15.52	141.8	165	2.93	40.3	17.2	17	208	RF
19	42	851	3	s419	17.86	128.2	159	3.43	37.4	15.4	19	207	RF
19	43	852	3	s370	16.03	140.4	160	2.91	34.2	14.7	20	209	RF
19	44	853	3	s405	17.4	145.6	160	3.18	28.7	15.5	25	206	RF
19	45	854	3	s326	18.87	131.2	156	2.32	27.8	16.4	21	202	RF
19	46	855	3	s387	17.55	118.8	157	3.36	33.5	16.5	24	205	RF
20	2	856	3	s310	15.83	111	155	2.9	30.8	15.2	21	204	RF
20	3	857	3	s313	28.96	119.8	153	1.51	25.1	13.6	17	201	RF
20	4	858	3	s148	16.32	137.2	157	1.67	29.2	15.3	23	202	RF
20	5	859	3	s128	18.28	110.8	155	1.58	30	16.1	24	204	RF
20	6	860	3	s231	15.47	110.6	154	1.5	27.8	14.4	22	196	RF
20	7	861	3	s220	18.99	112.8	156	1.26	26.6	16.2	19	200	RF
20	8	862	3	s417	13.46	117.8	154	1.42	36.3	16.6	24	202	RF
20	9	863	3	s251	16.79	111.6	155	1.42	28.7	15.5	24	204	RF
20	10	864	3	s412	15.56	113.4	157	1.99	32.2	14.8	24	206	RF
20	11	865	3	s269	17.69	103.4	159	1.04	26.2	15.6	17	203	RF
20	12	866	3	s263	16.19	91.6	162	0.54	26.7	15.5	13	200	RF
20	13	867	3	Filler	17.75	120.6	160	0.9	36.3	15	22	208	RF
20	14	868	3	s316	21.82	115.2	156	2.14	27.2	14.2	19	202	RF
20	15	869	3	s376	15.6	112.4	160	1.61	33.8	13.9	22	206	RF
20	16	870	3	s413	19.21	140.4	156	2.32	34.7	14.1	25	206	RF
20	17	871	3	s138	18.95	120.8	160	1.6	33.5	14.4	18	206	RF
20	18	872	3	s275	21.64	130	154	3.18	27.8	14.2	25	202	RF
20	19	873	3	s218	17.11	117.6	160	0.71	25.6	16.4	19	200	RF
20	20	874	3	s341	15.32	111	162	1.06	23.7	15.9	13	200	RF
20	21	875	3	s380	18.15	110.8	161	0.79	34.9	14.9	17	207	RF
20	22	876	3	s169	20.17	116.4	160	1.5	30.5	14.9	19	206	RF
20	23	877	3	s55	19.24	118.2	152	2.19	30.6	14.9	28	204	RF
20	24	878	3	s241	20.4	117.4	158	1.8	25.5	13.7	15	204	RF
20	25	879	3	s154	20.57	131.8	160	2.44	27.7	16.2	20	207	RF
20	26	880	3	s391	14.84	113.2	161	1.58	33.6	16.3	19	208	RF
20	27	881	3	s124	18.41	108	162	1.63	28.7	16.1	15	207	RF
20	28	882	3	s83	19.56	87.6	167	1.42	33.6	16.1	12	208	RF
20	29	883	3	s130	15.15	118.6	160	1.76	37.3	15.4	17	205	RF
20	30	884	3	s211	19.08	140.4	162	1.38	28.6	14.3	19	205	RF
20	31	885	3	s337	28.67	145.2	159	2.55	28.9	13.8	21	205	RF
20	32	886	3	s132	17.45	122	158	2.37	36	14.8	21	206	RF
20	33	887	3	s168	11.92	103.4	162	0.39	28.9	18.6	19	206	RF
20	34	888	3	s134	17.48	112.4	162	1.47	34.5	15	16	206	RF
20	35	889	3	s30	26.2	139.2	159	2.3	28.5	14.3	20	205	RF
20	36	890	3	s366	17.66	121.4	160	1.74	36.9	13.6	21	207	RF
20	37	891	3	s184	17.77	136	162	1.28	31.4	14.8	21	208	RF
20	38	892	3	s223	14.83	134.4	158	1.44	27.1	14.1	19	202	RF
20	39	893	3	s88	18.08	119.8	164	3.42	33	16.1	17	208	RF
20	40	894	3	s238	17.77	139.8	162	2.68	29.2	15.8	21	208	RF
20	41	895	3	s373	13.68	128.2	159	2.45	38.6	17.1	22	206	RF
20	42	896	3	s144	16.04	137.4	160	2.58	28.2	15.7	21	205	RF
20	43	897	3	s236	17.66	127	159	2.18	24	15	18	201	RF
20	44	898	3	s119	18.21	119.6	159	3.56	33.6	15.4	19	207	RF
20	45	899	3	s355	16.93	128	157	3.96	34.8	15.6	20	206	RF
20	46	900	3	s368	16.47	142.6	157	3.62	35.2	15.4	24	206	RF
21	2	901	3	s428	18.21	96.6	158	1.76	31.7	14.3	21	205	RF
21	3	902	3	s175	14.35	97.4	159	0.99	37.1	14.7	18	202	RF
21	4	903	3	s92	16.83	115.2	156	1.67	34.3	15	19	203	RF
21	5	904	3	s190	16.65	116.2	156	1.38	37.1	15.8	23	206	RF
21	6	905	3	s383	18.88	103.8	156	1.68	31.7	16.5	22	205	RF
21	7	906	3	s372	13.09	101.6	156	1.81	35	17.2	24	203	RF
21	8	907	3	s157	19.53	107.8	159	1.92	32.1	15.5	22	207	RF
21	9	908	3	s75	19.77	95.8	155	2.79	33	15.3	22	205	RF
21	10	909	3	s278	17.19	137	159	1.78	29.8	15.7	21	201	RF
21	11	910	3	s140	17.57	110.4	160	1.39	33.2	14.6	16	204	RF
21	12	911	3	s398	19.47	140	157	2.22	30.9	14.5	25	208	RF
21	13	912	3	s393	14.59	108.8	160	1.93	32.6	15.1	22	208	RF
21	14	913	3	s392	15.83	119.4	159	2.44	30.5	14.9	23	206	RF
21	15	914	3	s258	17.99	97.6	161	0.67	28.1	15.9	14	204	RF
21	16	915	3	s322	19.58	109.6	157	1.36	31.3	15.4	21	206	RF
21	17	916	3	s360	15.76	117.8	159	2.35	32.3	15.2	19	205	RF
21	18	917	3	s142	20.37	113.8	160	1.64	30.1	15	21	205	RF
21	19	918	3	s302	18.9	127.8	156	2.02	26.7	13.9	23	201	RF
[truncated: 1,704 more rows]

## Sheet: supptable2
Table S2. Genotypes for all safflower accessions
S5	0	0	0	0	0	0	0	0	0	0	0	0	0	0	0	0	0	1	0	0	0	1	0	0	0	0	0	0	0	0	0	1	0	0	0	0	0	0	1	0	0	0	0	0	0	0	0	0	0
S34	1	0	0	2	0	2	0	0	0	0	0	0	0	1	0	0	0	0	0	2	0	0	0	0	0	0	0	0	0	0	0	1	0	0	0	0	0	0	0	2	2	0	0	0	0	0	0	0	2
S50	0	0	0	2	0	0	0	0	0	0	0	0	0	0	0	0	0	1	0	0	0	0	0	0	0	0	0	0	0	0	0	1	0	0	0	0	0	0	1	2	0	2	0	0	0	0	0	0	0
S58	0	0	0	1	0	0	0	0	0	1	0	0	0	1	0	0	2	1	0	0	0	0	0	0	0	0	0	0	1	0	0	1	0	0	0	0	0	0	1	2	0	0	0	0	0	0	0	0	1
S66	0	0	0	2	2	2	2	2	0	2	0	0	0	2	0	0	2	1	2	0	0	0	2	0	0	0	0	0	1	0	0	1	0	0	0	0	0	0	0	2	0	0	0	0	0	0	0	0	2
S75	0	0	0	2	1	2	2	0	0	1	0	0	0	2	2	0	2	0	2	0	0	0	2	0	0	0	0	0	1	0	0	1	0	0	0	0	0	0	0	1	0	0	0	0	0	0	0	0	2
S83	0	0	0	2	2	2	0	0	0	0	0	0	0	2	2	0	2	1	0	0	0	0	2	0	0	0	0	0	2	0	0	1	0	0	0	0	0	0	1	2	0	0	0	0	0	0	0	0	2
S108	0	0	0	2	2	2	2	0	0	2	0	0	0	2	0	0	2	1	0	0	0	0	0	0	0	0	0	0	2	0	0	1	0	0	0	0	0	0	1	2	0	0	2	0	0	0	0	0	2
S124	0	0	0	2	0	0	0	0	2	0	0	0	0	2	0	0	2	1	0	0	0	0	0	0	0	0	0	0	0	0	0	1	0	0	0	0	0	0	0	1	2	0	1	0	0	0	0	0	1
S8	0	0	0	2	2	2	1	0	0	0	0	0	0	2	1	0	2	1	1	0	0	0	1	0	1	1	0	0	2	0	0	1	0	1	0	0	0	0	1	2	0	0	0	0	0	0	0	0	2
S38	2	0	0	2	0	1	0	2	0	0	0	0	0	0	0	0	0	1	0	0	0	0	0	0	0	0	0	0	0	0	0	0	0	0	0	0	0	0	1	2	2	0	0	0	0	0	0	0	2
S51	0	0	0	2	0	0	0	0	0	0	0	0	0	0	0	0	0	1	0	0	0	1	0	0	0	0	0	0	0	0	0	0	0	0	0	0	0	0	1	2	0	2	0	0	0	0	0	0	0
S59	0	0	0	0	0	0	0	0	0	2	0	0	0	0	2	0	2	1	0	0	0	0	0	0	0	0	0	0	2	0	1	1	0	0	0	0	0	0	1	2	0	0	0	0	0	0	0	0	0
S67	0	0	0	1	1	2	0	0	0	0	0	0	0	0	0	0	1	1	2	0	0	0	0	0	0	0	0	0	2	0	0	2	0	0	0	0	0	0	1	2	0	2	0	0	0	0	0	0	2
S76	0	0	0	2	2	2	2	0	0	0	0	0	0	2	2	0	2	1	2	0	0	0	2	0	0	0	0	0	2	0	0	1	0	0	0	0	0	0	0	1	0	0	0	0	0	0	0	0	2
S93	0	0	0	2	2	2	2	0	0	1	0	0	0	2	1	0	2	1	0	0	0	0	1	0	0	0	0	0	2	0	1	1	0	0	0	0	0	0	1	2	0	0	0	0	0	0	0	0	2
S101	0	0	0	2	0	0	0	0	2	1	0	0	0	2	0	0	2	1	0	0	0	0	0	0	0	0	0	0	0	0	0	1	0	0	0	0	0	0	1	0	2	0	0	0	0	0	0	0	2
S117	0	0	0	2	2	2	1	0	0	1	0	0	0	0	0	0	2	1	0	0	0	0	0	0	0	0	0	0	2	0	0	1	0	0	0	0	0	0	1	2	0	0	1	0	0	0	0	0	2
S125	0	0	0	2	0	2	0	0	0	0	0	0	0	2	0	0	0	1	0	0	0	0	2	0	0	0	0	0	0	0	0	1	0	0	0	0	0	0	0	2	0	0	2	0	0	0	0	0	2
S12	0	0	0	2	0	1	0	0	2	0	0	0	0	0	0	0	0	1	0	0	0	0	0	0	0	0	0	0	0	0	0	0	0	0	0	0	0	0	1	0	2	0	0	0	0	0	0	0	2
S41	0	0	0	2	0	2	0	0	2	0	0	1	0	0	0	1	2	0	0	0	0	0	0	0	0	0	0	0	0	0	0	1	0	0	0	0	0	0	0	0	2	0	2	0	0	0	0	0	2
S52	0	0	0	2	0	0	1	0	0	0	0	0	0	0	1	0	0	1	0	0	0	0	0	0	0	0	0	0	0	0	0	1	0	0	0	0	0	0	1	1	0	0	0	0	0	0	0	0	1
S60	0	0	0	2	2	2	2	0	0	0	0	0	0	2	2	0	2	1	2	0	0	0	2	0	0	0	0	0	2	0	0	1	0	0	0	1	0	0	0	0	0	0	0	0	0	0	0	0	2
S69	0	0	0	2	1	1	1	0	0	0	0	0	0	2	2	0	1	1	1	0	0	0	2	0	0	0	0	0	2	0	0	1	0	0	0	0	0	0	1	2	0	0	0	0	0	0	0	0	2
S77	0	0	0	2	1	2	2	0	0	1	0	0	0	2	2	0	1	1	2	0	0	0	2	0	0	0	0	0	1	0	0	1	0	0	0	0	0	0	1	1	0	0	0	0	0	0	0	0	2
S85	0	0	0	2	2	2	2	0	0	0	0	0	0	2	2	0	2	1	1	0	0	0	1	0	0	0	0	0	0	0	0	1	0	0	0	0	0	0	1	0	0	0	0	0	0	0	0	0	2
S94	0	0	0	2	0	0	0	0	0	0	0	0	0	0	0	0	1	1	1	0	0	0	1	0	0	0	0	0	0	0	0	1	0	0	0	0	0	0	0	1	1	0	0	0	0	0	0	0	2
S102	0	2	0	2	0	1	1	0	0	0	0	0	0	0	0	0	0	1	0	0	0	1	0	0	0	0	0	0	1	0	0	1	0	0	0	0	0	0	1	2	2	0	2	0	0	0	0	0	0
S110	0	0	0	2	0	0	0	0	0	1	0	0	0	0	0	0	2	1	0	0	0	0	0	0	0	0	0	0	0	0	0	1	0	2	0	0	0	2	1	0	0	0	0	0	0	0	0	0	2
S126	0	0	0	2	0	2	0	0	0	0	0	0	2	2	0	0	2	1	0	0	0	0	0	0	0	0	0	0	0	0	2	1	0	0	0	0	0	0	1	0	1	0	2	0	0	0	0	0	2
S13	0	0	0	2	0	1	0	0	2	0	0	0	0	0	0	0	1	1	0	0	0	0	0	0	0	0	0	0	0	0	0	1	0	0	0	0	0	0	1	1	2	0	0	0	0	0	0	0	2
S43	0	0	0	2	0	0	0	0	2	0	0	0	0	1	0	0	2	1	0	0	0	0	0	0	0	0	0	0	0	0	0	0	0	0	0	0	2	0	1	2	0	0	1	0	0	0	0	0	2
S53	0	0	0	2	0	0	0	0	0	0	0	0	0	0	0	0	2	1	0	0	0	0	0	0	0	0	0	0	0	0	0	1	0	0	0	0	0	0	0	2	0	0	0	0	0	0	0	0	2
S61	0	0	0	2	2	1	2	0	2	0	0	0	2	2	2	0	2	1	1	0	0	0	1	0	1	0	0	0	0	0	0	1	0	0	0	2	0	0	0	0	2	0	0	0	0	0	0	0	2
S70	0	0	0	2	2	1	2	0	0	1	0	0	0	2	2	0	2	1	2	0	0	0	2	0	0	0	0	0	2	0	2	1	0	0	0	0	0	0	1	2	0	0	0	0	0	0	0	0	2
S78	0	0	0	2	2	2	2	0	1	1	0	0	0	2	1	0	2	1	2	0	0	1	2	0	0	0	1	0	1	0	0	1	0	0	0	0	0	0	1	0	0	0	0	0	0	0	0	0	2
S86	0	0	0	2	0	0	1	0	0	0	0	0	0	2	2	0	2	1	0	0	0	0	2	0	0	0	0	0	1	0	0	1	0	0	0	0	0	0	1	0	0	0	0	0	0	0	0	0	2
S95	0	0	0	2	1	1	1	0	1	1	0	0	0	1	0	0	1	0	0	0	0	0	1	0	0	0	0	0	1	0	0	1	0	0	0	0	0	0	0	2	2	0	0	0	0	0	0	0	2
S103	0	0	0	2	0	0	0	0	0	1	0	0	0	0	0	0	2	1	0	0	0	0	0	0	0	0	0	0	0	0	0	1	0	0	0	0	0	0	1	2	0	0	0	0	0	0	0	0	2
S127	0	0	0	2	0	1	1	0	0	0	0	0	0	0	0	0	2	1	1	0	0	0	2	0	0	0	0	0	0	0	1	1	0	0	0	0	0	0	1	0	0	0	2	0	0	0	0	0	2
S18	0	0	0	2	0	1	0	0	0	0	1	0	0	2	0	0	1	1	0	0	0	0	0	0	0	0	0	0	0	0	0	1	0	0	0	0	0	0	1	1	2	0	0	0	0	0	0	0	2
S45	0	0	0	2	2	2	0	0	0	2	0	0	0	0	0	0	2	1	0	0	0	0	0	0	0	0	0	0	0	0	0	1	0	0	0	0	2	0	0	0	0	0	1	0	0	0	0	0	2
S54	0	0	0	2	0	1	0	0	0	2	0	0	0	0	0	0	0	1	0	0	0	0	0	0	0	0	0	0	1	0	0	1	0	0	0	2	0	0	1	2	0	1	0	0	0	0	0	0	0
S62	0	0	0	2	2	2	2	0	0	0	0	0	0	2	2	0	2	1	2	0	0	0	2	0	0	0	0	0	2	0	0	1	0	0	0	0	0	0	0	0	0	0	0	0	0	0	0	0	2
S71	0	0	0	2	2	2	2	0	0	0	0	0	0	2	0	0	2	1	2	0	0	1	2	0	0	0	0	0	2	0	0	1	0	0	0	0	0	0	0	2	0	0	0	0	0	0	0	0	2
S79	0	0	0	2	2	2	2	0	0	0	0	0	0	2	2	0	2	1	2	0	0	0	2	0	0	0	2	0	2	0	0	1	0	0	0	0	0	0	1	0	0	0	0	0	0	0	0	0	2
S96	0	0	0	2	2	2	0	0	0	0	0	0	0	2	0	0	2	1	0	0	0	0	1	0	0	0	0	0	2	0	0	1	0	0	0	0	0	0	1	2	0	0	0	0	0	0	0	0	2
S120	0	0	0	2	0	0	0	0	0	1	0	0	0	0	0	0	1	1	0	0	0	1	0	0	0	0	0	0	0	0	0	1	0	0	0	0	0	0	1	0	0	0	0	0	0	0	0	0	2
S128	0	0	0	2	0	1	1	0	1	0	0	0	0	1	0	0	2	1	1	0	0	0	2	0	0	0	0	0	1	0	0	1	1	0	0	0	0	0	1	1	1	0	1	0	0	0	0	0	2
S19	2	0	0	2	1	1	1	0	0	0	0	0	0	2	0	0	0	1	1	0	0	0	1	0	0	0	0	0	0	0	0	0	0	0	0	0	1	0	1	2	2	0	2	0	0	0	0	0	2
S46	0	0	0	0	0	2	0	0	0	0	0	0	0	0	0	0	2	1	0	0	0	0	0	0	0	0	0	0	0	0	0	1	0	0	0	0	2	0	0	0	0	0	0	0	0	0	0	0	2
S55	0	0	0	1	0	0	0	0	0	0	0	0	0	1	0	0	2	1	2	0	0	0	0	0	0	0	0	0	0	0	0	1	0	0	0	0	0	0	1	0	0	0	0	0	0	0	0	0	0
S63	0	0	0	2	0	2	0	0	0	1	0	0	0	0	0	0	2	1	2	0	0	1	2	0	0	0	0	0	0	0	0	1	0	0	0	1	0	0	1	2	0	0	0	0	0	0	0	0	2
S72	0	0	0	2	2	2	2	0	0	1	0	0	0	2	1	0	2	1	2	0	0	0	2	0	0	0	0	0	2	0	0	1	0	0	0	0	0	0	1	2	0	0	0	0	0	0	0	0	2
S80	0	0	0	2	1	2	1	0	0	1	0	0	0	2	2	0	1	1	1	0	0	0	2	0	0	0	0	0	1	1	0	1	0	0	0	0	0	0	1	2	0	0	0	0	0	0	0	0	1
S97	0	0	0	2	2	2	0	2	0	0	2	0	0	2	1	0	2	1	0	0	0	0	1	0	0	0	0	0	2	0	0	1	0	0	0	0	0	0	0	2	2	0	0	0	0	0	0	0	2
S129	0	0	0	2	2	0	1	0	1	1	0	0	0	2	0	0	2	1	0	0	0	0	2	0	0	0	0	0	0	0	0	1	0	2	0	0	0	0	1	0	0	0	0	0	0	0	0	0	2
S30	2	0	0	2	0	2	2	0	1	0	0	0	0	0	0	0	1	1	0	0	0	0	0	0	0	0	0	0	0	0	0	1	2	0	0	0	0	0	1	2	0	0	2	0	0	0	0	0	2
S47	0	0	0	2	0	2	0	0	0	1	0	0	0	2	0	0	0	0	0	0	0	0	0	0	0	0	0	0	0	0	0	1	0	0	0	0	0	0	0	0	0	0	0	0	0	0	0	0	2
S56	0	0	0	2	0	0	0	0	0	0	0	0	0	0	0	0	1	2	0	0	0	0	0	0	0	0	0	0	0	0	0	1	0	0	0	0	0	0	1	2	0	0	0	0	0	0	0	0	2
S64	0	0	0	2	2	2	2	0	0	0	0	0	0	2	2	0	2	1	2	0	0	0	2	0	0	0	0	0	2	0	0	1	0	0	0	0	0	0	0	2	0	0	0	0	0	0	0	0	2
S73	0	0	0	2	0	0	2	2	0	2	0	0	0	2	2	0	2	1	2	0	0	0	2	0	0	0	0	0	2	0	0	1	0	0	0	0	0	0	1	2	0	0	0	0	0	0	0	0	2
S90	0	0	0	2	2	0	2	0	0	2	0	0	0	0	1	0	2	0	2	0	0	0	2	0	0	0	0	0	2	0	0	1	0	0	0	0	0	0	1	0	0	0	0	0	0	0	0	0	2
S98	0	0	2	2	2	0	1	0	0	1	0	0	0	0	0	0	2	1	0	0	0	0	0	0	0	0	0	0	0	0	0	1	0	0	0	0	0	0	1	2	0	0	0	0	0	0	0	0	2
S114	2	0	0	2	0	2	2	0	0	0	0	0	0	0	0	0	0	1	0	0	0	1	0	0	0	0	0	0	0	0	0	1	2	0	0	0	0	0	1	2	0	0	0	0	0	0	0	0	2
S122	0	0	1	2	0	0	0	0	2	0	0	0	0	0	0	0	2	1	0	0	0	0	0	0	0	0	0	0	0	0	0	1	0	0	0	0	0	0	1	0	0	0	0	0	0	0	0	0	2
S130	0	0	0	2	2	2	2	0	2	0	0	0	0	2	0	0	2	1	0	0	0	0	2	0	0	0	0	0	0	0	0	1	0	0	0	0	0	0	1	0	0	0	0	0	0	0	0	0	2
S31	1	0	0	2	0	2	0	0	0	0	0	0	0	0	0	0	2	1	0	0	0	0	0	0	0	0	0	0	0	0	0	1	0	0	0	0	0	0	1	0	2	0	2	0	0	0	0	0	2
S49	0	0	0	2	0	0	0	0	0	1	0	0	0	0	0	0	0	1	0	0	0	1	0	0	0	0	0	0	0	0	1	2	0	0	0	0	0	0	0	2	0	2	0	0	0	0	0	0	0
S57	0	0	0	2	2	1	0	0	0	2	0	0	0	0	0	0	2	1	1	0	0	0	0	0	0	0	0	0	0	0	0	1	0	0	0	0	0	0	1	2	0	0	0	0	0	0	0	0	2
S65	0	0	0	2	2	2	1	0	0	0	0	0	0	2	2	0	2	1	1	0	0	1	1	0	0	0	0	0	1	0	0	1	0	0	0	0	0	0	0	2	0	0	0	0	0	0	0	0	2
S74	0	0	0	2	2	2	1	0	0	0	0	0	0	0	0	0	2	1	2	0	0	1	2	0	0	0	0	0	2	0	0	1	0	0	0	0	0	0	1	2	0	0	0	0	0	0	0	0	2
S82	0	0	0	2	2	2	0	0	0	0	0	0	0	2	0	0	2	1	0	0	0	0	2	0	0	0	0	0	2	0	0	1	0	0	0	0	0	0	1	2	0	0	0	0	0	0	0	0	2
S91	0	0	0	2	2	2	2	0	0	0	0	0	0	0	0	0	2	1	2	0	0	0	2	0	0	0	0	0	0	0	0	1	0	0	0	0	0	0	1	2	0	0	0	0	0	0	0	0	2
S99	0	0	0	2	0	2	0	0	0	0	0	0	0	0	0	0	0	0	0	0	0	0	1	0	0	0	0	0	0	0	0	1	0	0	0	0	2	0	1	1	0	0	0	0	0	0	0	0	2
S115	2	0	0	2	0	2	0	0	0	1	0	0	0	0	0	0	2	1	0	0	0	0	1	0	0	0	0	0	2	0	0	1	0	0	0	0	0	0	1	2	0	0	2	0	0	0	0	0	2
S131	0	0	0	2	2	1	2	0	1	1	0	0	0	2	1	0	2	1	1	0	0	0	2	0	0	0	0	0	1	0	0	1	0	0	0	0	0	0	1	1	0	0	0	0	0	0	0	0	2
S132	0	0	0	2	2	2	1	0	0	0	0	0	0	2	1	0	2	1	2	0	0	0	2	0	0	0	0	0	1	0	0	1	0	0	0	0	0	0	1	0	0	0	0	0	0	0	0	0	2
S140	0	0	0	2	0	2	1	0	0	0	0	0	0	0	0	0	1	1	1	0	0	0	0	0	0	0	0	0	0	0	0	1	0	0	0	0	0	0	1	1	0	0	0	0	0	0	0	0	1
S148	0	0	0	2	0	2	1	0	0	0	0	0	0	0	0	0	1	1	0	0	0	0	1	0	0	0	0	0	0	0	0	1	0	0	0	0	0	0	1	0	0	0	1	0	0	0	0	0	1
S157	0	0	0	2	0	2	0	0	1	0	0	1	0	0	0	0	1	1	0	0	0	0	0	0	0	0	0	0	0	0	0	1	0	0	0	0	0	0	1	0	0	0	2	0	0	0	0	0	2
S165	2	0	0	2	0	2	2	0	1	0	0	0	0	0	0	0	0	1	0	0	0	0	0	0	0	0	0	0	0	0	0	1	2	0	1	1	0	0	1	2	0	0	2	0	0	0	0	0	2
S174	0	0	0	2	0	1	2	0	2	0	0	0	0	0	0	0	2	1	0	0	0	0	0	0	0	0	0	0	0	0	1	0	0	0	1	0	0	0	1	0	0	0	1	0	0	0	0	0	2
S183	0	0	0	1	0	0	0	0	2	0	0	0	0	0	0	0	1	1	0	0	0	0	0	0	0	0	0	0	0	0	0	1	0	0	0	0	0	0	1	1	0	0	0	0	0	0	0	0	1
S192	0	0	0	2	2	2	2	0	2	0	0	0	0	0	0	0	2	0	0	0	0	0	2	0	0	0	0	0	0	0	0	1	0	0	0	0	0	0	0	2	0	0	0	0	0	0	0	0	2
S203	0	0	0	2	2	2	2	0	0	2	0	0	0	0	1	0	2	0	0	0	0	0	0	0	0	0	0	0	0	0	0	1	0	0	0	0	0	0	1	2	0	0	0	0	0	0	0	0	2
S211	0	0	0	1	0	0	0	0	0	0	0	0	0	0	0	0	0	1	0	0	0	0	0	0	0	0	0	0	0	0	0	1	0	0	0	0	0	0	1	2	0	0	0	0	0	0	0	0	0
S219	0	0	0	2	0	0	2	0	0	1	0	0	0	0	0	0	2	1	0	0	0	0	0	0	0	0	0	0	0	0	0	1	0	0	0	0	0	0	1	2	0	0	2	2	0	0	0	0	2
S227	0	0	0	2	0	2	0	0	0	1	0	0	0	0	0	0	0	1	0	0	0	0	0	0	0	0	0	0	0	0	0	1	0	0	0	0	0	0	1	2	0	0	0	0	0	0	0	0	2
S133	0	0	0	2	2	2	2	0	0	0	0	0	0	0	1	0	2	1	1	0	0	0	2	0	0	0	0	0	2	0	0	1	0	0	0	0	0	0	0	2	0	0	0	0	0	0	0	0	2
S141	0	0	0	2	2	2	2	0	2	2	0	0	0	0	1	0	2	1	0	0	0	0	2	0	0	0	0	0	2	0	0	1	0	0	0	0	0	0	1	0	0	0	0	0	0	0	0	0	2
S149	0	0	0	2	0	2	2	1	2	0	0	0	0	0	2	0	2	1	0	0	0	0	0	0	0	0	0	0	0	0	0	1	0	0	0	2	0	0	1	0	0	0	0	0	0	0	0	0	0
S158	0	0	0	2	0	0	0	0	2	1	0	0	0	0	0	0	0	0	0	0	0	0	0	0	0	0	0	0	0	0	0	1	0	0	0	0	0	0	1	1	0	0	0	0	0	0	0	0	0
S166	0	0	0	1	1	1	1	1	0	0	0	0	0	1	0	0	0	1	1	0	0	0	1	0	0	0	0	0	1	0	0	1	0	0	0	0	0	0	1	1	0	0	0	0	0	0	0	0	1
S175	0	0	0	2	2	0	2	0	0	0	0	0	0	0	1	0	2	1	0	0	0	0	0	0	0	0	0	0	0	0	0	1	1	0	0	0	0	0	1	2	2	0	0	0	0	0	0	0	2
S184	0	0	0	0	0	0	0	0	0	0	0	0	0	0	0	0	0	1	0	0	0	1	0	0	0	0	0	0	0	0	0	1	0	0	0	0	0	0	1	2	0	0	0	0	0	0	0	0	0
S194	0	0	0	2	2	2	2	0	0	0	0	0	0	2	2	0	2	1	2	0	0	0	2	0	0	0	0	0	2	0	0	1	0	0	0	0	0	0	1	0	0	0	0	0	0	0	0	0	2
S212	1	0	0	2	0	1	0	0	0	0	2	0	0	0	0	0	0	1	0	1	0	0	1	0	0	0	0	0	0	0	0	1	0	0	0	0	0	0	0	2	1	0	1	0	0	0	0	0	2
S228	2	0	0	2	2	0	2	0	0	0	0	0	0	0	0	0	0	1	0	0	0	1	0	0	0	0	0	0	0	0	0	1	2	0	0	0	0	0	1	2	0	0	0	0	0	0	0	0	2
S134	0	0	0	2	2	2	2	0	2	0	0	0	0	0	1	0	2	1	0	0	0	0	0	0	0	0	0	0	2	0	0	1	0	0	0	0	0	0	0	0	2	0	0	0	0	0	0	0	2
S142	0	0	0	1	0	1	0	0	0	0	0	0	0	0	0	0	2	1	0	0	0	1	1	0	0	0	0	0	2	0	0	2	0	0	0	0	0	0	0	1	0	0	2	0	0	0	0	1	2
S150	0	0	0	1	0	0	2	0	0	2	0	0	0	0	0	0	2	1	0	0	0	0	0	0	0	0	0	0	0	0	0	1	0	0	0	2	0	0	1	0	2	0	2	0	0	0	0	0	0
S159	0	0	0	2	0	0	0	0	0	1	0	0	0	0	0	0	0	0	0	0	0	0	2	0	0	0	0	0	0	0	0	0	0	0	0	0	0	0	0	0	2	0	0	0	0	0	0	0	2
S167	0	0	0	2	0	2	2	2	0	1	0	0	0	2	0	0	2	1	2	0	0	0	1	0	0	0	0	0	1	0	0	1	0	0	0	0	0	0	1	1	0	0	1	0	0	0	0	0	2
S176	0	0	0	2	2	1	1	0	0	1	0	0	0	1	1	0	2	1	0	0	0	1	1	0	0	0	0	0	1	0	0	1	0	0	0	0	0	0	1	1	1	0	0	0	0	0	0	0	2
S185	2	0	0	2	0	1	1	0	0	1	0	0	0	0	0	0	2	1	0	0	0	0	0	0	0	0	0	0	2	0	0	1	0	0	0	0	0	0	1	2	2	0	2	0	0	0	0	0	2
S195	0	0	0	2	0	2	1	1	0	1	0	0	0	0	0	0	2	0	0	0	0	1	0	0	0	0	0	0	1	0	0	1	0	0	0	0	0	0	0	2	0	0	0	0	0	0	0	0	2
S205	0	0	0	2	0	0	0	0	2	0	0	0	0	2	0	0	2	0	0	0	0	1	0	0	0	0	0	0	0	0	0	1	0	0	1	0	0	0	1	0	2	0	0	0	0	0	0	0	2
S213	0	0	0	2	0	0	1	0	0	0	0	0	0	0	0	0	2	1	0	0	0	0	0	0	0	0	0	0	0	0	0	1	0	0	0	0	0	0	0	2	0	0	2	2	0	0	0	0	2
S221	0	0	0	2	0	2	0	0	0	2	0	0	0	2	0	0	2	1	0	0	0	0	0	0	0	0	0	0	0	0	0	1	0	0	0	1	0	0	1	2	0	0	2	0	0	0	0	0	2
S229	0	0	0	2	0	0	0	0	2	1	0	0	0	0	0	0	2	0	0	0	0	0	0	0	0	0	0	0	0	0	0	1	0	0	0	0	0	0	1	0	2	0	0	0	0	0	0	0	2
S135	0	0	0	2	0	0	0	0	2	1	0	0	0	0	0	0	2	1	0	0	0	0	1	0	0	0	0	0	0	0	0	1	0	0	0	0	0	0	1	1	0	0	0	0	0	0	0	0	2
S143	0	0	0	1	0	0	0	0	0	1	0	0	0	1	0	0	1	1	0	0	0	0	0	0	0	0	0	0	1	0	0	0	0	0	0	0	0	0	1	1	0	0	0	0	0	0	0	0	1
S151	0	0	0	2	0	1	0	1	1	0	0	0	0	1	0	0	1	1	0	0	0	0	0	0	0	0	0	0	0	0	0	1	0	0	0	0	0	0	1	0	1	0	1	0	0	0	0	0	2
S160	0	0	0	1	0	1	0	0	0	0	0	0	0	1	0	0	1	1	0	0	0	0	1	0	0	0	0	0	0	0	0	1	0	0	0	0	0	0	1	0	0	0	0	0	0	0	0	0	2
S168	0	0	0	2	1	1	1	0	0	1	0	0	0	0	0	0	2	1	1	0	0	1	1	0	0	0	0	0	0	0	0	1	0	0	0	0	0	0	1	1	0	0	0	0	0	0	0	0	2
S178	0	0	0	2	0	1	1	0	0	0	0	0	0	1	0	0	1	0	0	0	0	0	1	0	0	0	0	0	0	0	0	1	0	0	0	0	0	0	0	1	0	0	1	0	0	0	0	0	2
S186	0	0	0	2	0	0	0	0	0	1	0	0	0	0	0	0	0	1	0	0	0	0	0	0	0	0	0	0	0	0	0	1	0	0	0	0	0	0	1	2	0	0	0	0	0	0	0	0	2
S196	0	0	0	2	2	2	2	0	0	0	0	0	0	2	2	0	2	1	2	0	0	0	1	0	0	0	0	0	1	0	0	1	0	0	0	0	0	0	0	2	0	0	0	0	0	0	0	0	2
S206	0	0	0	2	0	0	0	0	2	0	0	0	0	0	0	0	1	1	0	2	0	0	0	0	0	0	0	0	0	0	0	1	0	0	0	0	0	0	1	1	2	0	1	0	0	0	0	0	2
S214	0	0	0	2	0	1	0	0	0	1	0	0	0	1	0	0	2	1	0	0	0	0	0	0	0	0	0	0	0	0	0	1	0	1	0	0	0	1	0	0	1	0	0	0	0	0	0	0	2
S222	0	0	0	2	0	2	2	0	0	0	0	0	0	0	0	0	2	1	0	0	0	0	2	0	0	0	0	0	0	0	0	1	0	0	0	2	0	0	1	2	0	0	0	0	0	0	0	0	2
S230	0	0	0	2	0	1	0	0	1	0	0	0	0	1	0	0	2	0	2	0	0	0	1	0	0	0	0	0	1	0	0	1	0	0	0	0	0	0	1	2	0	0	0	0	0	0	0	0	1
S136	0	0	0	2	2	2	2	0	0	1	0	0	0	2	1	0	2	1	0	0	0	1	1	0	0	0	0	0	1	0	0	1	0	0	0	0	0	0	1	1	0	0	0	0	0	0	0	0	2
S144	0	0	0	2	0	2	2	0	0	0	0	0	0	0	0	0	0	1	0	0	0	1	0	0	0	0	0	0	0	0	0	1	0	0	0	1	0	0	1	1	0	0	2	0	0	0	0	0	2
S153	1	0	0	2	0	2	0	0	0	0	0	0	0	0	0	0	0	1	0	0	0	0	0	0	0	0	0	0	1	0	0	1	0	0	0	2	0	0	1	2	0	0	0	0	0	0	0	0	2
S161	0	0	0	2	0	0	0	0	2	0	0	0	0	0	0	0	2	1	0	2	0	0	0	0	0	0	0	0	0	0	0	1	0	0	0	0	0	0	1	2	2	0	0	0	0	0	0	0	2
S169	0	0	0	2	0	2	2	1	1	1	0	0	0	0	1	0	2	1	0	0	0	0	2	0	0	0	0	0	0	0	0	1	0	0	0	0	0	0	1	0	0	0	0	0	0	0	0	0	1
S179	1	0	0	2	0	0	1	2	0	1	0	0	0	0	1	0	2	1	0	0	0	1	0	0	0	0	0	0	0	0	0	1	0	0	0	0	0	0	1	1	2	0	0	0	0	0	0	0	2
S187	0	0	0	2	0	0	0	0	2	1	0	0	0	0	0	0	2	1	0	0	0	0	0	0	0	0	0	0	0	0	0	1	0	0	0	0	0	0	0	0	2	0	0	0	0	0	0	0	2
S197	0	0	0	2	2	1	2	2	0	0	0	0	0	0	0	0	2	1	0	0	0	0	1	0	0	0	0	0	0	0	0	1	0	0	0	0	0	0	1	1	0	0	0	0	0	0	0	0	2
S207	0	0	0	2	0	1	0	1	0	0	0	0	0	1	1	0	2	0	1	0	0	0	0	0	0	0	0	0	0	0	0	1	2	0	0	1	0	0	1	0	1	0	0	0	0	0	0	0	2
S215	0	0	0	2	0	1	1	0	1	2	0	0	0	1	0	0	2	1	1	0	0	0	1	0	0	0	0	0	0	0	0	1	0	0	0	0	0	0	1	1	1	0	1	0	0	0	0	0	2
S223	0	0	0	2	0	2	0	0	0	0	0	0	0	0	0	0	0	0	0	0	0	0	0	0	0	0	0	0	0	0	0	1	0	0	0	2	0	0	0	2	2	0	2	0	0	0	0	0	2
S231	0	0	0	2	1	1	1	0	0	0	0	0	0	0	0	0	1	1	1	0	0	0	1	0	0	0	0	0	0	0	0	1	0	0	0	0	0	0	1	2	0	0	1	0	0	0	0	0	2
S137	0	0	0	2	0	1	0	0	0	1	0	0	0	2	0	0	0	1	0	0	0	0	0	0	0	0	0	0	0	0	0	1	0	0	0	0	0	0	1	0	0	0	0	0	0	0	0	0	1
S145	0	1	0	1	0	1	0	0	0	1	0	0	0	0	0	0	0	1	0	0	0	0	0	0	0	0	0	0	0	0	0	1	0	0	0	0	0	0	1	0	0	0	1	0	0	0	0	0	1
S154	2	0	0	2	0	0	1	0	0	0	0	0	0	0	0	0	2	1	0	0	0	0	0	0	0	0	0	0	1	0	0	2	0	0	0	0	1	0	1	1	2	0	2	0	0	0	0	0	2
S162	0	0	0	2	0	0	1	0	0	0	0	0	0	0	0	0	2	1	1	0	0	0	0	0	0	0	0	0	0	0	0	1	0	0	0	0	0	0	0	2	0	0	0	2	0	0	0	0	2
S170	0	0	0	2	2	0	2	1	0	2	0	0	0	0	2	0	2	1	2	0	0	0	2	0	0	0	0	0	2	0	0	1	0	0	0	0	0	0	1	0	0	0	0	0	0	0	0	0	2
S180	2	0	0	2	0	0	0	0	0	0	0	0	0	0	0	0	0	1	0	0	0	1	0	0	0	0	0	0	0	0	0	1	0	0	0	0	2	0	1	2	2	0	2	0	0	0	0	0	2
S188	0	0	0	2	0	0	0	0	0	0	0	0	0	0	0	0	0	0	0	0	0	0	0	0	0	0	0	0	0	0	0	1	0	0	0	0	0	0	0	0	0	0	0	0	0	0	0	0	1
S198	0	0	0	2	1	2	1	0	0	1	0	0	0	0	0	0	2	1	1	1	0	0	1	0	0	0	0	0	1	0	0	1	0	0	0	0	0	0	1	2	0	0	0	0	0	0	0	0	2
S208	0	0	0	2	0	2	0	0	2	0	2	0	0	0	0	0	0	0	0	2	0	0	0	0	0	0	0	0	0	0	0	1	0	0	0	0	0	0	1	2	2	0	0	0	0	0	0	0	2
S216	0	0	0	2	0	1	1	0	0	0	0	0	0	0	1	0	2	0	0	0	0	0	0	0	0	0	0	0	0	0	0	1	0	0	0	0	0	0	0	2	0	0	1	1	0	0	0	0	2
S224	0	0	0	2	0	1	0	0	2	0	0	0	0	0	0	0	0	1	0	2	0	0	0	0	0	0	0	0	0	0	0	1	0	0	0	0	0	0	1	2	2	0	0	0	0	0	0	0	2
S232	0	0	0	0	0	0	0	0	2	0	0	0	0	0	0	0	2	1	0	0	0	0	0	0	0	0	2	0	0	0	0	1	0	0	0	0	0	0	0	2	2	0	0	0	0	0	0	0	2
S138	1	0	0	2	2	2	2	0	0	0	0	0	0	0	2	0	2	1	2	0	0	0	0	0	0	0	0	0	2	0	0	1	0	0	0	0	0	0	1	2	0	0	2	0	0	0	0	0	2
S146	0	0	0	1	0	0	0	0	0	1	0	0	0	0	0	0	0	1	0	0	0	0	0	0	0	0	0	0	0	0	0	1	0	0	0	0	0	0	1	1	0	0	0	0	0	1	0	0	1
S155	0	0	0	2	0	2	0	0	0	0	0	0	0	2	0	0	2	1	0	0	0	0	2	0	0	0	0	0	0	0	2	0	0	0	0	1	2	0	1	2	2	0	2	0	0	0	0	0	2
S163	0	2	0	2	0	0	0	0	0	1	0	0	0	0	0	0	0	1	0	0	0	1	0	0	0	0	0	0	0	0	0	0	0	0	0	0	0	0	1	1	0	0	1	0	0	0	0	0	2
S172	0	0	0	2	0	2	2	0	0	1	0	0	0	0	0	0	2	1	0	0	0	1	1	0	0	0	0	0	1	0	0	1	0	0	0	0	0	0	1	2	0	0	0	0	0	0	0	0	2
S181	0	0	0	1	0	0	0	0	0	0	0	0	0	0	0	0	0	1	0	0	0	0	0	0	0	0	0	0	0	0	0	1	0	0	0	0	0	0	1	1	1	0	0	0	0	0	0	0	2
S190	0	0	0	2	2	2	2	0	2	0	0	0	0	2	2	0	2	0	0	0	0	1	1	0	0	0	0	0	1	0	1	1	0	0	0	2	0	0	0	0	0	0	1	0	0	0	0	0	2
S199	0	0	0	2	0	0	0	0	2	0	0	0	0	2	0	0	2	1	2	0	0	1	2	0	0	0	0	0	1	0	0	0	0	2	0	0	0	0	1	0	2	0	0	0	0	0	0	0	2
S209	0	0	0	2	0	1	0	0	2	0	1	0	0	0	0	0	0	1	0	0	0	1	0	0	0	0	0	0	0	0	0	1	0	0	0	1	0	0	1	0	2	0	0	0	0	0	0	0	2
S217	0	0	0	2	0	0	0	0	2	0	0	0	0	2	0	0	2	1	0	0	0	0	0	0	0	0	0	0	0	0	0	1	0	0	0	0	2	1	0	2	0	0	1	0	0	0	0	0	2
S233	0	0	0	2	0	1	0	0	2	1	0	0	2	2	0	0	2	0	0	0	0	0	0	0	0	0	0	0	0	0	0	1	0	0	0	0	0	0	1	0	2	0	0	0	0	0	0	0	2
S139	0	0	0	2	0	2	0	0	0	0	0	0	0	2	0	0	0	1	0	0	0	0	0	0	0	0	0	0	0	0	0	1	0	0	0	2	0	0	1	0	0	0	0	0	0	0	0	0	0
S147	1	0	0	2	0	1	0	0	0	0	0	0	0	0	0	0	1	1	0	0	0	0	0	0	0	0	0	2	0	0	0	1	0	0	0	0	0	0	1	0	0	0	0	0	0	0	0	0	1
S156	2	0	0	2	0	0	2	0	2	1	0	0	0	0	0	0	0	1	0	0	0	0	0	0	0	0	0	0	0	0	0	1	2	0	0	2	0	0	1	2	2	0	2	0	0	0	1	0	2
S164	0	0	0	2	0	2	2	0	0	0	0	0	0	2	0	0	2	0	0	0	0	0	0	0	0	0	0	0	2	0	0	1	0	0	0	0	0	0	1	2	0	0	2	0	0	0	0	2	2
S173	0	0	0	2	0	2	2	0	0	1	0	0	0	0	0	0	2	1	0	0	0	0	2	0	0	0	0	0	2	0	0	1	0	0	0	0	0	0	1	2	0	0	0	0	0	0	0	0	2
S182	0	0	0	0	0	0	0	0	0	0	0	0	0	0	0	0	0	1	0	0	0	0	0	0	0	0	0	0	0	0	1	0	0	0	0	0	0	0	0	0	2	0	0	0	0	0	0	1	0
S191	0	0	0	2	2	2	2	0	0	1	0	0	0	0	0	0	2	0	0	0	0	0	2	0	0	0	0	0	0	0	0	1	0	0	0	0	0	0	0	2	0	0	0	0	0	0	0	0	2
S200	0	0	0	1	1	2	2	0	0	0	0	0	0	2	1	0	2	1	2	0	0	1	1	0	0	0	0	0	1	0	0	1	0	0	0	0	0	0	1	1	0	0	0	0	0	0	0	0	2
S210	0	0	0	2	0	0	0	0	2	0	0	0	0	0	0	0	0	0	0	0	0	0	0	0	0	0	0	0	0	0	0	1	0	0	0	1	0	0	1	2	0	0	0	0	0	0	0	0	2
S218	0	0	0	2	0	0	0	0	1	0	0	0	0	0	0	0	2	0	0	0	0	0	0	0	0	0	0	0	0	0	0	1	0	0	0	0	1	0	1	2	0	0	1	0	0	0	0	0	2
S226	0	0	0	2	0	1	0	0	0	0	0	0	0	0	0	0	0	1	0	2	0	0	0	0	0	0	0	0	0	0	0	1	0	0	0	0	0	0	1	2	0	0	0	0	0	0	0	0	2
S234	0	0	0	2	0	2	0	0	1	0	0	0	2	0	0	0	2	1	0	0	0	0	0	0	0	0	0	0	0	0	0	1	0	1	0	0	0	0	1	1	2	0	0	0	0	0	0	0	2
S235	0	0	0	2	0	2	0	0	0	0	2	0	0	0	0	0	2	1	0	0	0	0	0	0	1	0	0	0	0	0	0	0	0	0	0	0	0	0	1	2	2	0	2	0	0	0	0	0	2
S243	0	0	0	2	1	2	0	0	1	2	0	0	0	2	0	0	1	1	1	1	0	0	1	0	0	0	0	0	0	0	0	1	0	1	0	0	0	0	1	1	2	0	0	0	0	0	0	0	2
S251	0	0	0	1	1	1	1	0	1	0	0	0	0	2	1	0	1	1	0	0	0	0	0	0	0	0	0	0	0	0	0	1	0	0	0	2	1	0	1	0	0	0	2	0	0	0	0	0	2
S259	0	0	0	2	0	0	0	0	2	0	0	0	0	2	0	0	2	1	0	0	0	1	0	0	0	0	0	0	0	0	0	1	0	0	0	0	0	0	1	0	2	0	0	0	0	0	0	0	2
S267	0	0	0	2	0	2	0	0	0	0	0	0	0	2	0	0	1	1	0	0	0	0	0	0	0	0	0	0	0	0	0	1	0	0	0	0	0	2	1	0	2	0	0	0	0	0	0	0	2
S275	1	0	0	2	0	2	2	0	0	0	0	0	0	0	0	0	1	1	0	0	0	0	0	0	0	0	0	0	0	0	0	1	0	0	0	1	2	0	1	2	2	0	2	0	0	0	0	0	2
S283	0	0	0	2	0	0	0	2	0	2	0	0	0	2	0	0	2	1	0	0	0	0	0	0	0	0	0	0	0	0	0	1	0	0	0	1	0	0	1	0	2	0	2	0	0	0	0	0	2
S291	0	0	0	2	0	0	0	0	1	1	0	0	0	0	1	0	2	1	1	0	0	0	1	0	0	0	0	0	1	0	0	1	0	0	0	0	0	0	1	0	2	0	0	0	0	0	0	0	2
S299	0	0	0	2	0	1	1	0	1	0	0	0	0	1	0	0	1	1	1	0	0	1	1	0	0	0	0	0	1	0	0	1	0	0	0	0	0	0	0	1	0	0	0	0	0	0	0	0	2
S307	0	0	0	2	0	0	0	0	2	1	0	0	0	2	0	0	1	1	0	0	0	0	0	0	0	0	0	0	0	0	0	1	0	1	0	0	0	0	1	0	2	0	0	0	0	0	0	0	2
S315	0	0	0	0	0	0	2	0	0	0	0	0	0	0	0	0	2	1	0	0	0	1	0	0	0	0	0	0	0	0	0	0	0	0	0	0	0	0	1	0	1	0	0	0	0	0	0	0	2
S323	0	0	0	2	0	0	0	0	2	0	0	0	0	0	0	0	2	1	0	0	0	0	0	0	0	0	0	0	0	0	0	1	0	0	0	0	0	0	1	0	2	0	1	0	0	0	0	0	2
S236	1	0	0	2	0	2	0	0	0	0	0	0	0	0	0	0	0	1	0	1	0	0	0	0	0	0	0	0	0	0	0	1	0	0	0	0	0	0	1	0	2	0	0	0	0	0	0	0	2
S244	0	0	0	2	0	1	1	0	0	0	0	0	0	0	1	0	2	1	0	0	0	1	0	0	0	0	0	0	0	0	0	0	0	0	0	0	0	0	1	0	0	0	0	0	0	0	0	0	2
S252	0	0	0	2	2	0	1	0	1	0	0	0	0	2	1	0	2	1	1	0	0	1	0	0	0	0	0	0	1	0	0	1	0	1	0	0	0	0	1	1	2	0	2	0	0	0	0	0	2
S260	0	0	0	2	2	1	0	0	0	0	0	0	0	0	0	0	2	1	0	0	0	0	0	0	0	2	0	0	0	0	0	1	0	0	0	0	0	0	1	2	0	0	0	0	0	0	0	0	2
S268	0	0	0	2	2	2	1	0	1	1	0	0	0	2	2	0	2	1	0	0	0	0	2	0	0	0	0	0	2	0	0	0	0	0	0	0	0	0	1	2	2	0	0	0	0	0	0	0	2
S276	2	0	0	2	0	0	0	0	0	0	0	0	0	2	0	0	0	1	0	0	0	0	0	0	0	0	0	0	0	0	0	1	0	0	0	1	0	0	1	0	2	0	2	0	0	0	0	0	2
S284	0	0	0	2	0	0	0	0	0	0	2	0	0	0	0	0	2	1	0	0	0	0	0	0	0	0	0	0	0	0	0	1	0	0	0	0	0	0	1	0	2	0	2	0	0	0	0	0	2
S292	0	0	0	2	0	1	0	0	1	0	0	0	0	1	0	0	2	1	1	0	0	0	0	0	0	0	0	0	0	0	0	1	0	0	0	0	0	0	1	1	2	0	0	0	0	0	0	0	2
S300	0	0	0	2	0	0	0	0	0	0	0	0	0	0	0	0	0	1	0	0	0	0	0	0	0	0	0	0	0	0	0	1	0	0	0	0	0	0	1	2	0	0	0	0	0	0	0	0	2
S308	0	0	2	2	0	0	0	0	2	0	0	0	0	2	0	0	2	0	0	0	0	0	0	0	0	0	0	0	0	0	0	1	0	0	0	0	0	0	1	0	2	0	0	0	0	0	0	0	2
S316	0	0	0	2	0	2	2	0	2	2	0	0	0	0	0	0	0	1	0	0	0	1	0	0	0	0	0	0	1	0	0	0	0	0	0	0	0	0	1	0	2	0	0	0	0	0	0	0	2
S324	0	0	0	2	0	0	0	0	2	0	0	0	0	2	0	0	2	1	0	0	0	0	0	0	0	0	0	0	0	0	0	1	0	2	0	0	2	2	1	2	0	0	1	0	0	0	0	0	2
S237	1	0	0	2	0	2	0	0	0	0	0	0	0	0	0	0	2	1	0	0	0	0	0	0	0	0	0	0	1	0	0	1	0	0	0	0	2	0	1	1	2	0	0	0	0	0	0	0	2
S245	0	0	0	2	0	0	2	0	0	0	0	0	0	2	0	0	1	1	0	0	0	0	0	0	0	0	0	0	0	0	0	1	0	1	0	0	0	0	1	0	0	0	0	0	0	0	0	0	2
S253	0	0	0	2	2	0	0	0	2	0	0	0	0	2	0	0	2	1	0	0	0	0	1	0	0	0	0	0	1	0	0	1	0	0	0	0	0	0	1	1	2	0	0	0	0	0	0	0	2
S269	0	0	0	2	2	1	0	0	0	0	0	0	0	0	0	0	2	0	0	0	0	0	0	0	0	0	0	0	0	0	0	1	0	2	0	0	0	1	0	1	2	0	0	0	0	0	0	0	2
S277	0	0	0	2	0	2	0	0	0	0	0	0	0	2	0	0	0	1	0	2	0	0	0	0	0	0	0	0	0	0	0	2	0	0	0	0	0	0	1	2	2	0	0	0	0	0	0	0	2
S285	1	0	0	2	0	0	0	0	0	0	1	0	0	2	0	0	1	1	0	0	0	1	0	0	0	0	0	0	0	0	0	1	0	0	0	2	0	0	1	2	2	0	2	0	0	0	0	0	2
S293	0	0	0	2	0	1	1	0	1	2	0	0	0	2	0	0	2	1	1	0	0	0	1	0	1	0	0	0	0	0	0	1	0	0	0	0	0	0	1	1	2	0	1	0	0	0	0	0	2
S301	0	0	0	1	0	1	0	0	0	0	0	0	0	0	0	0	0	1	0	0	0	0	0	0	0	0	1	0	0	0	0	0	0	0	0	0	0	0	1	2	0	0	0	0	0	0	0	0	2
S309	0	0	0	2	2	2	2	0	0	0	0	0	0	2	2	0	2	1	2	0	0	0	2	0	0	0	0	0	2	0	0	1	0	0	0	0	0	0	1	1	0	0	0	0	0	0	0	0	2
S317	0	0	0	2	0	2	1	0	2	0	0	0	0	0	0	0	0	1	0	0	0	0	0	0	0	0	0	0	0	0	0	1	0	0	0	0	0	0	1	2	2	0	0	0	0	0	0	0	2
S325	0	0	0	2	0	0	0	0	2	0	0	0	0	2	0	0	2	1	0	0	0	0	0	0	0	0	0	0	0	0	0	1	0	1	0	0	1	1	1	2	0	0	1	0	0	0	0	0	2
S238	0	0	0	2	0	2	1	0	0	0	0	0	0	0	0	0	1	1	0	0	0	0	0	0	0	0	0	0	0	0	0	1	0	0	0	0	2	0	1	2	0	0	1	0	0	0	0	0	2
S246	0	0	0	2	0	0	0	0	0	0	0	0	0	2	1	0	2	1	0	0	0	0	0	0	0	0	0	0	0	0	0	1	0	0	0	1	0	0	1	2	0	0	0	0	0	0	0	0	2
S254	0	0	0	2	0	0	0	0	0	0	0	0	0	2	0	0	2	1	0	0	0	0	0	0	0	2	0	0	0	0	0	1	0	2	0	2	0	2	1	0	0	0	0	0	0	0	0	0	2
S262	0	0	0	2	0	0	0	0	2	0	0	0	0	2	0	0	2	1	0	0	0	0	0	0	0	0	0	0	0	0	0	1	0	2	0	0	0	0	1	0	2	0	0	0	0	0	0	0	2
S270	0	0	0	2	0	2	0	0	0	0	0	0	0	0	1	0	0	1	0	0	0	0	0	0	0	0	0	0	0	0	0	1	0	0	0	2	0	1	1	2	0	0	2	0	0	0	0	0	2
S278	1	0	0	2	0	2	0	0	2	0	0	0	0	2	0	0	0	1	0	1	0	0	0	0	0	0	0	0	0	0	0	1	0	0	0	0	2	0	0	0	2	0	0	0	0	1	0	0	2
S286	0	0	0	2	0	0	0	0	0	0	2	0	0	2	0	0	2	1	0	0	0	0	0	0	0	0	0	0	0	0	0	1	0	0	0	2	0	0	1	0	2	0	2	0	0	0	0	0	2
S294	0	0	0	2	0	0	0	0	2	1	0	0	0	0	0	0	2	1	0	0	0	0	0	0	0	0	0	0	0	0	0	1	0	0	0	0	0	0	1	0	2	0	0	0	0	0	0	0	2
S302	0	0	0	2	0	0	0	0	0	0	0	0	0	0	0	0	0	1	0	0	0	0	0	0	0	0	0	0	1	0	0	1	0	0	0	0	0	0	1	2	0	0	0	0	0	0	0	0	2
S310	1	0	0	2	1	1	1	0	0	0	0	0	0	2	1	0	1	1	1	0	0	0	1	0	0	0	0	0	1	0	0	1	0	0	0	0	0	0	1	2	1	0	0	0	0	0	0	0	2
S318	0	0	0	2	0	0	2	0	0	0	0	0	0	0	0	0	2	1	0	0	0	0	0	0	0	0	0	0	0	0	0	0	0	0	0	0	0	0	1	0	0	0	2	2	0	0	0	0	2
S326	1	0	0	2	0	1	1	2	2	0	0	0	0	0	0	0	2	1	0	0	0	0	0	0	0	0	0	0	0	0	0	1	0	0	0	1	1	0	1	1	0	0	1	1	0	0	0	0	2
S239	0	0	0	1	0	1	1	0	0	0	0	0	0	0	0	0	0	1	0	0	0	0	0	0	0	0	0	0	0	0	0	1	0	0	0	0	0	0	1	1	0	0	1	0	0	0	0	0	2
S247	0	0	0	2	0	0	0	0	0	0	0	0	0	2	0	0	2	1	0	0	0	0	0	0	0	2	0	0	0	0	0	1	0	2	0	0	0	2	1	0	0	0	0	0	0	0	0	0	2
S255	0	0	0	2	2	0	0	0	0	0	0	0	0	2	0	0	2	1	0	0	0	0	0	0	0	2	0	0	0	0	0	1	0	2	0	0	0	2	1	0	0	0	2	0	0	0	0	0	2
S263	0	0	0	2	0	0	0	0	0	2	0	0	0	0	0	0	2	1	0	0	0	0	0	0	0	0	0	0	0	0	0	1	0	0	0	0	0	0	1	0	0	0	0	0	0	0	0	0	2
S271	2	0	0	2	0	1	2	0	0	0	0	0	0	0	0	0	2	1	0	0	0	0	0	0	0	0	0	0	1	0	0	1	2	0	0	0	2	0	1	2	2	0	2	0	0	0	0	0	2
S287	0	0	0	2	0	1	0	0	1	0	0	0	0	1	0	0	1	1	0	1	0	0	0	0	0	0	0	0	0	0	0	0	0	0	0	0	0	0	0	0	1	0	0	0	0	0	0	0	2
S295	0	0	0	2	0	2	0	0	0	0	0	0	1	0	0	0	0	1	0	0	0	0	0	0	0	0	0	0	0	0	0	1	0	0	0	0	0	0	1	1	0	0	0	0	0	0	0	0	2
S303	0	0	0	1	0	0	0	0	2	0	0	0	0	0	0	0	1	1	0	0	0	0	0	0	0	0	0	0	1	0	0	1	0	0	0	0	0	0	1	0	2	0	0	0	0	0	0	0	1
S311	0	0	0	1	1	0	1	0	0	0	0	0	0	0	0	0	0	1	0	0	0	0	0	0	0	0	0	0	0	0	0	1	0	0	0	0	0	0	1	0	0	0	0	0	0	0	0	0	0
S319	0	0	0	2	0	2	0	2	2	2	0	0	0	2	0	0	2	1	0	2	0	0	0	0	0	0	0	0	0	0	0	1	0	0	0	0	0	0	1	0	2	0	0	0	0	0	0	0	2
S327	0	0	0	2	0	1	0	0	2	0	0	0	0	2	0	0	2	1	0	0	0	0	0	0	0	0	0	0	0	0	0	1	0	0	0	0	2	0	1	2	1	0	1	0	0	0	0	0	2
S240	0	0	0	2	0	0	1	0	2	0	0	0	0	0	0	0	2	1	0	0	0	0	0	0	0	0	0	0	0	0	0	1	0	0	0	0	0	0	1	0	2	0	0	0	0	0	0	0	2
S248	0	0	0	2	0	0	0	0	2	2	0	0	0	0	0	0	2	1	0	0	0	0	0	0	0	0	0	0	0	0	0	2	0	0	0	0	0	0	1	0	2	0	0	0	0	0	0	0	2
S256	0	0	0	2	0	0	0	0	2	0	0	0	0	2	0	0	2	1	0	0	0	0	0	0	0	2	0	0	0	0	0	1	0	2	0	2	0	2	1	0	0	0	0	0	0	0	0	0	2
S264	0	0	0	2	0	0	0	0	2	0	0	0	0	2	0	0	2	1	0	0	0	0	0	0	0	0	0	0	0	0	0	1	0	2	0	0	0	0	1	0	2	0	0	0	0	0	0	0	2
S272	2	0	0	2	0	2	0	0	0	0	0	0	0	0	0	0	0	1	0	0	0	0	0	0	0	0	0	0	0	0	2	1	0	0	2	0	2	0	1	2	2	0	2	0	0	0	0	0	2
S280	0	0	0	2	0	1	0	0	0	0	0	0	0	0	0	0	0	1	0	0	0	0	0	0	0	0	0	0	0	0	0	1	0	0	0	0	0	0	1	0	2	0	0	0	0	0	0	0	2
S288	0	0	0	2	0	0	0	0	2	1	0	0	0	2	0	0	2	1	0	0	0	0	0	0	0	0	0	0	0	0	0	1	0	0	0	0	0	0	1	0	2	0	0	0	0	0	0	0	2
S296	0	0	0	2	0	2	0	0	0	1	0	0	0	0	0	0	0	1	0	0	0	0	0	0	0	0	0	0	0	0	0	1	0	0	0	0	0	0	1	2	0	0	0	0	0	0	0	0	2
S304	2	0	0	2	0	0	1	0	0	1	0	0	0	1	0	0	2	1	1	0	0	1	0	0	0	0	0	0	2	0	0	1	0	0	0	0	1	0	1	1	2	0	2	0	0	0	0	0	2
S312	0	0	0	0	0	1	0	0	2	1	0	0	0	0	0	0	0	1	0	0	0	0	0	0	0	0	0	0	0	0	0	1	0	0	0	1	0	0	1	0	1	0	0	0	0	0	0	0	2
S320	0	0	2	2	0	0	0	0	2	0	0	0	0	2	0	0	2	1	0	0	0	0	0	0	0	1	0	0	0	0	0	1	0	2	0	0	0	0	1	0	0	0	0	0	0	0	0	0	2
S328	0	0	0	2	0	0	0	0	2	0	0	0	0	2	0	0	2	1	0	0	0	0	0	0	0	0	0	0	0	0	0	1	0	0	0	0	2	0	1	2	0	0	2	0	0	0	0	0	2
S241	2	0	0	2	0	0	0	0	0	1	0	0	0	0	0	0	0	1	0	0	0	0	0	0	0	0	0	0	0	0	0	1	0	0	0	2	0	0	1	1	2	0	0	0	0	0	0	0	2
S249	0	0	0	2	0	1	1	0	1	0	0	0	0	2	0	0	1	1	0	0	0	0	0	0	0	0	0	0	0	0	0	1	1	2	0	1	0	0	1	0	0	0	1	0	0	0	0	0	2
S257	0	0	0	2	0	0	0	0	0	1	0	0	0	1	0	0	2	1	0	0	0	0	0	0	0	2	0	0	0	0	0	1	0	2	0	0	1	2	1	1	1	0	0	0	0	0	0	0	2
S265	0	0	0	2	0	0	0	0	0	1	0	0	0	2	0	0	2	1	0	0	0	0	0	0	0	2	0	0	0	0	0	1	0	2	0	0	0	2	1	0	0	0	0	0	0	0	0	0	2
S273	2	0	0	2	0	2	2	0	0	1	0	0	0	0	0	0	0	1	0	0	0	0	0	0	0	0	0	0	0	0	0	1	0	0	0	0	2	0	1	2	2	0	2	0	0	0	0	0	2
S281	0	0	0	2	2	0	0	0	0	0	0	0	0	0	0	0	2	1	0	0	0	0	0	0	0	0	0	0	0	0	0	1	0	0	0	0	0	0	1	0	2	0	2	0	0	0	0	0	2
S289	0	0	0	2	0	1	0	0	0	0	2	0	0	1	0	0	1	1	0	0	0	1	0	0	0	0	0	0	0	0	0	0	0	0	0	0	0	0	1	0	2	0	0	0	0	0	0	0	2
S297	0	0	0	2	0	2	0	0	0	0	0	0	0	0	0	0	0	1	0	0	0	0	0	0	0	0	0	0	0	0	0	1	0	0	0	0	0	0	1	2	0	0	0	0	0	0	0	0	2
S305	2	0	0	2	0	0	1	0	1	1	0	0	0	1	0	0	1	1	1	0	0	0	0	0	0	0	0	0	0	0	0	1	2	0	0	1	0	0	1	1	0	0	1	0	0	0	0	0	2
S313	0	0	0	2	0	0	2	0	0	0	0	0	0	0	0	0	0	1	0	0	0	0	0	0	0	0	0	0	0	0	0	1	0	0	0	1	0	0	1	2	2	0	2	0	0	0	0	0	2
S321	0	0	0	2	0	0	2	0	0	0	0	0	0	0	0	0	0	1	0	0	0	1	0	0	0	0	0	0	0	0	0	1	0	0	0	1	2	0	1	2	1	0	1	2	0	0	0	0	2
S329	0	0	0	2	0	0	0	2	2	0	0	0	0	2	0	0	2	1	0	0	0	0	0	0	0	0	0	0	0	0	0	1	0	0	0	0	0	0	1	0	2	0	0	0	0	0	0	0	2
S242	0	0	0	2	2	2	0	0	1	0	0	0	0	2	2	0	0	1	1	0	0	1	0	0	0	0	0	0	0	0	0	1	0	0	0	0	1	0	1	1	0	0	0	0	0	0	0	0	2
S250	0	0	0	2	0	0	0	0	2	0	0	0	0	0	0	0	2	1	0	0	0	0	0	0	0	0	0	0	1	0	0	1	0	0	0	0	0	0	0	0	2	0	0	0	0	0	0	0	2
S258	0	0	0	2	0	0	0	0	0	0	0	0	0	2	0	0	2	2	0	0	0	0	0	0	0	2	0	0	0	0	0	1	0	2	0	0	0	2	1	0	0	0	0	0	0	0	0	0	2
S266	0	0	0	2	0	0	0	0	1	2	0	0	0	0	0	0	1	1	0	0	0	0	0	0	0	0	0	0	0	0	0	1	0	0	0	0	0	0	0	2	0	0	0	0	0	0	0	0	2
S274	0	0	0	0	0	0	0	0	0	1	0	0	0	0	0	0	0	1	0	0	0	0	0	0	0	0	0	0	0	0	0	1	0	0	0	0	0	0	1	2	0	0	0	0	0	0	0	0	0
S282	0	0	0	2	1	2	1	0	0	0	0	0	0	0	2	0	2	1	0	0	0	1	0	0	0	0	0	0	2	0	0	1	0	0	0	0	0	0	1	2	1	0	0	0	0	0	0	0	2
S290	0	0	0	0	0	0	1	0	2	0	0	0	0	2	1	0	0	1	0	0	0	0	0	0	0	0	0	0	0	0	0	1	0	2	0	0	1	0	1	0	2	0	0	0	0	0	0	0	2
S298	0	0	0	2	0	0	0	0	0	0	0	0	0	0	0	0	0	1	0	0	0	0	0	0	0	0	0	0	0	0	0	1	0	0	0	0	0	0	0	2	0	0	0	0	0	0	0	0	2
S306	2	0	0	2	0	2	2	0	0	0	0	0	0	0	0	0	0	1	0	0	0	0	0	0	0	0	0	0	0	0	0	1	0	0	0	0	0	0	1	2	2	0	2	0	0	0	0	0	2
S314	0	0	0	2	1	2	2	0	0	0	0	0	0	1	0	0	1	1	1	0	0	0	1	0	0	0	0	0	1	0	0	1	1	1	0	0	0	0	1	0	0	0	1	0	0	0	0	0	2
S322	0	0	0	2	2	2	2	0	0	1	0	0	0	1	2	0	2	1	1	0	0	0	1	0	0	0	0	0	0	0	0	1	0	0	0	0	0	0	1	1	2	0	2	0	0	0	0	0	2
S330	0	0	0	2	0	1	0	2	2	0	0	0	0	0	0	0	0	1	0	1	0	0	0	0	0	0	0	0	0	0	0	1	0	0	0	0	2	0	1	0	2	0	0	0	0	0	0	0	2
S331	2	0	0	2	0	2	0	0	0	0	0	0	0	0	0	0	0	0	0	0	0	0	0	0	0	0	0	0	0	0	0	1	0	0	0	0	0	0	1	2	2	0	0	0	0	0	0	0	2
S339	0	0	0	2	0	2	1	0	0	0	1	0	0	0	0	0	0	1	0	0	0	0	0	0	0	0	0	0	0	0	0	2	0	0	0	0	0	0	1	0	2	0	0	0	0	0	0	0	2
S347	0	0	0	2	0	0	0	0	2	2	0	0	0	2	0	0	2	0	0	0	0	0	0	0	0	0	0	0	0	0	0	1	0	1	0	0	0	0	0	0	2	0	0	0	0	0	0	0	2
S357	0	0	0	2	2	2	2	0	0	0	0	0	0	0	2	0	2	0	2	0	0	0	2	0	0	0	0	0	0	0	0	1	0	0	0	0	0	0	0	0	1	0	0	0	0	0	0	0	2
S365	0	0	0	2	0	2	2	0	0	0	0	0	0	0	0	0	2	1	2	0	0	0	2	0	0	0	0	0	0	0	0	1	0	0	0	0	0	0	1	0	0	0	0	0	0	0	0	0	2
S382	1	0	0	2	0	2	0	0	2	0	0	0	0	0	1	0	2	1	1	0	0	0	2	0	0	0	0	2	0	0	0	1	0	0	0	0	0	0	0	1	0	0	0	0	0	0	0	0	0
S398	0	0	0	2	0	2	1	0	2	1	0	0	0	1	2	0	1	0	0	0	0	0	0	0	0	0	0	0	0	0	0	1	0	0	0	0	0	0	0	0	1	0	1	0	0	0	0	0	0
S407	0	0	0	2	0	2	2	0	0	0	0	0	0	1	1	0	2	1	0	0	0	0	0	0	0	0	0	0	0	0	0	2	0	0	0	0	0	0	1	1	0	0	0	0	0	0	0	0	2
S415	0	0	0	2	2	0	2	0	0	0	0	0	0	0	0	0	2	0	0	0	0	1	2	0	0	0	0	0	0	0	0	1	0	0	0	0	0	0	0	0	2	0	0	0	0	0	0	0	2
S332	0	0	0	2	0	0	0	0	1	0	0	0	0	0	0	0	2	0	0	0	0	1	0	0	0	0	0	0	0	0	0	1	0	0	0	0	0	0	1	1	2	0	0	0	0	0	0	0	2
S340	0	0	0	2	0	1	2	0	1	0	1	0	0	0	0	0	1	1	0	0	0	0	0	0	0	0	0	0	1	0	0	1	0	0	0	0	0	0	0	2	1	0	0	0	0	0	0	0	2
S348	0	0	0	2	0	0	0	0	2	0	0	0	0	2	0	0	2	1	0	0	0	0	0	0	0	0	0	0	0	0	0	1	0	2	0	0	0	0	1	0	1	0	0	0	0	0	0	0	2
S358	0	0	0	2	2	2	2	0	0	0	0	0	0	0	1	0	2	1	0	0	0	0	2	0	0	0	0	0	0	0	0	1	0	0	0	0	0	0	0	0	0	0	0	0	0	0	0	0	2
S366	0	0	0	2	0	2	2	0	0	0	0	0	0	0	0	0	2	0	2	0	0	0	2	0	0	0	0	0	2	0	0	1	0	0	0	0	0	0	1	0	0	0	0	0	0	0	0	0	2
S374	0	0	0	2	2	2	2	0	0	0	0	0	0	0	0	0	2	1	0	0	0	2	1	0	0	0	0	0	0	0	0	1	0	0	0	0	0	0	1	0	0	0	0	0	0	0	0	0	2
S383	0	0	0	2	0	1	1	0	0	0	0	0	0	0	1	0	2	1	1	0	0	0	0	0	0	0	0	0	1	0	0	1	0	0	0	0	0	0	1	2	0	0	1	0	0	0	0	0	2
S399	0	0	0	2	0	2	1	0	0	0	0	0	0	1	1	0	0	0	0	0	0	0	1	0	0	0	0	1	0	0	0	0	0	0	0	0	0	0	0	0	0	0	0	0	0	0	0	0	0
S424	0	0	0	2	0	0	0	0	1	2	0	0	0	2	0	0	2	1	0	0	0	0	0	0	0	0	0	0	0	0	0	1	0	0	0	0	0	0	1	0	0	0	1	0	0	0	0	0	2
S333	0	0	2	2	1	0	1	0	0	0	0	0	0	0	0	0	0	1	0	0	0	0	0	0	0	1	0	0	0	0	0	2	1	0	0	0	0	0	0	1	1	0	0	0	0	0	0	0	2
S341	0	0	0	2	0	2	0	0	0	0	0	0	0	0	0	0	0	1	0	2	0	0	0	0	0	0	0	0	0	0	0	1	0	0	0	0	0	0	1	2	2	0	0	0	0	0	0	0	2
S350	0	0	0	2	0	0	0	0	2	0	0	0	0	2	0	0	2	1	0	0	0	0	0	0	0	0	0	0	0	0	0	1	0	2	0	0	0	0	1	0	2	0	0	0	0	0	0	0	2
S359	0	0	0	2	2	2	2	0	0	0	0	0	0	1	2	0	2	1	2	0	0	0	2	0	0	0	0	0	0	0	0	1	0	0	0	0	0	0	1	2	2	0	0	0	0	0	0	0	2
S367	0	1	0	2	1	1	1	0	0	0	0	0	0	1	1	0	1	1	1	0	0	0	1	0	0	0	0	0	1	0	0	1	0	0	0	0	0	0	1	1	0	0	0	0	0	0	0	0	1
S375	0	0	0	0	0	2	2	0	2	2	0	0	0	0	0	0	2	1	0	0	0	0	0	0	0	0	0	0	0	0	0	1	0	0	0	0	0	0	1	0	0	0	0	0	0	0	0	0	2
S384	0	0	0	2	0	0	0	0	0	0	0	0	0	2	1	0	1	1	1	0	0	0	1	0	0	0	0	0	2	0	0	1	0	0	0	0	0	0	1	0	0	0	0	0	0	0	0	0	2
S392	0	1	0	1	0	0	0	0	0	0	0	0	0	0	0	0	0	1	0	0	0	0	0	0	0	0	0	0	0	0	0	1	0	0	0	0	0	0	1	0	0	0	0	0	0	0	0	0	1
S400	0	0	0	0	0	0	0	0	0	0	0	0	0	0	0	1	0	1	0	0	0	0	0	0	0	0	0	0	0	0	0	1	0	0	0	0	0	0	0	0	0	0	0	0	0	0	0	0	1
S409	0	0	0	2	0	2	2	0	0	0	0	0	0	0	1	0	2	1	1	0	0	0	2	0	0	0	0	0	2	0	0	1	0	0	0	0	0	0	1	1	0	0	0	0	0	0	0	0	2
S425	0	0	0	2	2	2	2	0	0	0	0	0	0	2	0	0	2	1	2	0	0	1	2	0	0	0	0	0	2	0	0	1	0	0	0	0	0	0	1	0	0	0	2	0	0	0	0	0	2
S334	2	0	0	2	0	2	2	0	0	0	0	0	0	0	0	0	0	1	0	0	0	0	0	0	0	0	0	0	0	0	0	1	2	0	0	0	0	0	0	2	2	0	2	0	0	0	0	0	2
S342	1	0	0	2	0	0	2	0	0	0	0	0	0	0	0	0	2	1	1	0	0	0	0	0	0	0	0	0	2	0	0	1	0	0	0	0	2	0	1	2	2	0	2	0	0	0	0	0	2
S351	0	0	0	2	2	0	0	0	2	0	0	0	0	2	0	0	2	1	0	0	0	0	0	0	0	0	0	0	0	0	0	1	0	2	0	0	0	0	1	0	1	0	0	0	0	0	0	0	2
S360	0	0	0	2	2	2	2	0	0	0	0	0	0	1	1	0	2	1	1	0	0	1	1	0	0	0	0	0	2	0	0	1	0	0	0	0	0	0	0	1	0	0	0	0	0	0	0	0	2
S368	0	0	0	2	1	1	2	0	1	0	0	0	0	0	0	0	2	1	1	0	0	0	1	0	0	0	0	0	0	0	0	0	0	0	0	0	0	0	0	2	0	0	0	0	0	0	0	0	2
S376	0	0	0	0	0	2	2	0	2	0	0	0	0	0	0	0	2	1	0	0	0	0	0	0	0	0	0	0	0	0	0	1	0	0	0	0	0	0	1	0	0	0	0	0	0	0	0	0	2
S385	0	0	0	2	0	0	0	0	0	1	0	0	0	0	0	0	0	1	0	0	0	0	0	0	0	0	0	0	0	0	0	1	0	0	0	0	0	0	1	0	0	0	0	0	0	0	0	0	0
S393	0	1	0	1	0	1	2	0	0	0	0	0	0	1	0	1	2	1	0	0	1	0	1	0	0	0	0	0	0	0	0	1	1	0	0	0	0	0	1	0	0	0	1	1	0	0	0	0	2
S402	0	0	0	2	0	2	0	0	1	0	0	0	0	1	0	1	2	1	0	0	0	0	0	0	0	0	0	0	0	0	0	1	0	0	0	0	0	0	1	1	1	0	1	0	0	0	0	0	2
S410	0	0	0	0	0	0	2	0	0	0	0	0	0	0	0	0	0	1	0	0	0	0	0	0	0	0	0	0	0	0	0	1	0	0	0	0	0	0	0	0	0	0	0	0	0	0	0	0	2
S418	0	0	0	2	2	0	2	0	2	0	0	0	0	1	0	0	2	0	2	0	0	0	2	0	0	0	0	0	2	0	0	1	0	0	0	0	0	0	0	0	0	0	0	0	0	0	0	0	2
S426	0	0	0	2	2	2	2	0	2	2	0	0	0	0	0	0	2	1	0	0	0	0	2	0	0	0	0	0	2	0	0	1	0	0	0	0	0	0	1	2	0	0	0	0	0	0	0	0	2
S343	0	0	0	2	0	0	0	0	2	2	0	0	0	1	0	0	2	1	0	0	0	0	0	0	0	0	0	0	0	0	0	1	0	1	0	0	0	0	0	0	2	0	0	0	0	0	0	0	2
S353	0	0	0	2	0	0	0	0	2	2	0	0	0	2	0	0	2	0	0	0	0	0	0	0	0	0	0	0	0	0	0	1	0	2	0	0	0	0	0	0	2	0	0	0	0	0	0	0	2
S361	0	0	0	2	1	1	1	0	0	0	0	0	0	1	0	0	2	1	0	0	0	0	1	0	0	0	0	0	1	0	0	1	0	0	0	0	0	0	1	1	0	0	0	0	0	0	0	0	2
S369	0	1	0	0	0	0	0	0	0	1	0	0	0	1	0	0	1	1	0	0	0	0	0	0	0	0	0	0	1	0	0	1	0	0	0	0	0	0	1	1	1	0	0	0	0	0	0	0	1
S377	0	0	0	1	1	2	2	0	2	0	0	0	0	0	1	0	2	1	0	0	0	0	0	0	0	0	0	0	0	0	0	1	0	0	0	0	0	0	1	0	0	0	1	0	0	0	0	0	2
S386	0	0	0	0	0	2	0	0	0	0	0	0	0	2	0	0	1	1	0	0	0	1	0	0	0	0	0	0	0	0	0	1	0	0	0	0	1	0	1	0	1	0	0	0	0	0	0	0	1
S394	0	1	0	2	0	1	1	0	0	0	0	0	0	1	0	1	2	1	2	0	0	0	2	0	0	0	0	0	0	0	0	1	2	0	0	0	1	0	1	1	0	0	1	0	0	0	0	0	2
S403	0	2	0	0	0	0	0	0	0	0	0	0	0	0	0	0	0	1	0	0	0	0	0	0	0	0	0	0	0	0	0	1	0	0	0	0	0	0	1	2	0	0	0	0	0	0	0	0	0
S411	0	0	0	2	2	2	2	0	0	2	0	0	0	2	2	0	2	0	2	0	0	0	2	0	0	0	0	0	2	0	0	1	0	0	0	0	0	0	0	2	0	0	2	0	0	0	0	0	2
S344	0	0	0	2	2	2	1	0	0	0	1	0	0	1	0	0	2	0	1	0	0	0	1	0	0	0	0	0	2	0	0	1	0	0	0	0	0	0	0	0	1	0	0	0	0	0	0	0	2
S354	0	0	0	2	1	2	1	1	0	0	0	0	0	2	2	0	2	1	1	0	0	0	1	0	0	0	0	0	1	0	0	1	0	0	0	0	0	0	1	1	0	0	1	0	0	0	0	0	2
S362	0	0	0	2	1	1	2	0	0	0	0	0	0	1	1	0	2	0	1	0	0	0	2	0	0	0	0	0	2	0	0	1	0	0	0	0	0	0	1	2	0	0	1	0	0	0	0	0	2
S370	0	2	0	0	2	2	0	0	0	0	0	0	0	0	0	0	0	0	0	0	0	0	0	0	0	0	0	0	0	0	0	1	0	0	0	0	0	0	0	2	2	0	0	0	0	0	0	0	0
S378	0	0	0	2	0	2	2	2	0	0	0	0	0	1	2	0	2	1	2	0	0	0	2	0	0	0	0	0	0	0	0	1	0	0	0	0	0	0	1	0	0	0	0	0	0	0	0	0	2
S387	0	0	0	0	0	2	2	0	0	0	0	0	0	0	0	0	2	1	0	0	0	0	0	0	0	0	0	0	0	0	0	1	0	0	0	0	0	0	1	0	0	0	0	0	0	0	0	0	2
S395	0	0	0	2	0	2	2	0	0	2	0	0	0	1	0	0	2	1	2	0	1	0	2	0	0	0	0	0	0	0	0	1	2	0	0	0	0	1	1	1	0	0	1	0	0	0	0	0	2
S412	0	0	0	2	2	2	2	0	2	2	0	0	0	1	2	0	2	1	0	0	0	0	2	2	0	0	0	0	2	2	0	1	0	0	0	0	0	0	1	0	0	0	0	0	0	0	0	0	2
S420	0	0	0	2	0	2	2	0	1	0	0	0	0	1	0	0	2	1	0	0	0	0	2	0	0	0	0	0	0	0	0	1	0	0	0	0	1	0	1	2	0	0	1	0	0	1	0	0	2
S428	0	0	0	2	0	1	0	0	2	0	0	0	0	0	0	0	2	0	2	0	0	0	2	0	0	0	0	0	0	0	0	1	0	0	0	0	0	0	0	0	0	0	0	0	0	0	0	0	2
S337	2	0	0	2	0	1	2	0	1	0	0	0	0	0	0	0	0	0	0	0	0	0	0	0	0	0	0	0	2	0	0	1	2	0	0	0	0	0	1	2	0	0	2	0	0	0	0	0	2
S345	0	0	0	2	2	2	2	0	0	0	0	0	0	2	2	0	2	1	2	0	0	0	2	0	0	0	0	0	2	0	0	1	0	0	0	0	0	0	0	1	0	0	0	0	0	0	0	0	2
S355	0	0	0	2	0	2	2	0	0	0	0	0	0	2	1	0	2	0	0	0	0	0	0	0	0	0	0	0	2	0	0	1	0	0	0	0	0	0	0	2	0	0	0	0	0	0	0	0	2
S363	0	0	0	2	0	0	2	0	0	2	0	0	0	0	2	0	2	1	2	0	0	0	2	0	0	0	0	0	2	0	0	1	0	0	0	0	1	0	1	1	1	0	0	0	0	0	0	0	2
S371	0	0	0	2	0	2	0	0	0	0	0	0	0	2	0	0	0	1	0	0	0	0	0	0	0	0	0	0	0	0	0	0	0	0	0	0	0	0	1	0	1	0	0	0	0	0	0	0	0
S379	0	0	0	2	2	2	2	0	2	0	0	0	0	0	1	0	2	1	0	0	0	0	0	2	0	0	0	0	1	1	0	1	0	0	0	0	0	0	1	0	0	0	0	0	0	0	0	0	2
S396	0	0	0	2	2	1	2	0	1	0	0	0	0	1	0	0	2	1	1	0	1	0	1	0	0	0	0	0	1	0	0	1	0	0	0	0	0	0	1	2	0	0	0	0	0	0	0	0	2
S405	0	0	0	2	0	1	1	0	0	0	0	0	0	0	0	0	0	1	0	0	0	0	0	0	0	0	0	0	0	0	0	1	0	0	0	0	0	0	0	1	0	0	1	0	0	0	0	0	1
S413	0	0	0	2	2	2	2	0	0	0	0	0	0	0	0	0	2	0	0	0	0	0	2	0	0	0	0	0	2	0	0	1	0	0	0	0	0	0	1	2	0	0	0	0	0	0	0	0	2
S421	0	1	0	2	0	0	1	0	1	2	0	0	0	2	0	0	2	1	0	0	0	0	1	0	0	0	0	0	0	0	0	1	0	0	0	0	0	0	0	1	0	0	0	0	0	0	0	0	2
S429	0	0	0	2	2	2	2	0	0	0	0	0	0	0	0	0	2	1	0	0	0	0	2	0	0	0	0	0	2	0	0	1	0	0	0	0	0	0	1	0	0	0	2	0	0	0	0	0	2
S338	0	0	0	2	0	2	2	0	0	0	0	0	0	0	0	0	0	0	0	0	0	0	0	0	0	0	0	0	0	0	0	1	2	0	0	0	0	0	1	2	0	0	2	0	0	0	0	0	2
S346	0	0	0	2	0	0	0	0	2	0	0	0	0	2	0	0	2	1	0	0	0	0	0	0	0	0	0	0	0	0	0	1	0	2	0	0	0	0	0	0	2	0	0	0	0	0	0	0	2
S356	0	0	0	2	2	2	2	0	0	2	0	0	0	0	0	0	2	0	0	0	0	0	2	0	0	0	0	0	0	0	0	1	0	0	0	0	0	0	0	0	0	0	0	0	0	0	0	0	2
S364	0	0	0	2	2	2	2	0	0	0	0	0	0	0	0	0	2	1	0	0	0	0	2	0	0	0	0	0	2	0	0	1	0	0	0	0	0	0	1	2	0	0	0	0	0	0	0	0	2
S372	0	0	0	0	0	2	2	0	2	0	0	0	0	0	0	0	2	1	0	0	0	0	0	0	0	0	0	0	0	0	0	1	0	0	0	0	0	0	1	0	0	0	0	0	0	0	0	0	2
S380	0	0	0	2	2	2	2	0	0	2	0	0	0	0	0	0	2	1	1	0	0	0	2	0	0	0	0	0	2	0	0	1	0	0	0	0	0	0	1	0	0	0	0	0	0	0	0	0	2
S389	0	0	0	2	2	2	2	0	1	0	0	0	0	0	2	0	2	0	2	0	0	0	2	2	1	0	0	0	2	1	0	1	0	0	0	0	0	0	0	1	0	0	0	0	0	0	0	0	2
S397	1	0	0	2	0	0	2	0	0	0	0	0	0	0	0	0	2	1	1	0	0	0	1	0	0	0	0	0	1	0	0	0	0	0	0	0	0	0	1	2	1	0	2	0	0	0	0	0	2
S406	0	0	0	2	0	1	0	0	2	0	0	0	0	0	0	0	0	1	0	0	0	0	1	0	0	0	0	0	0	0	0	1	0	0	0	0	0	0	0	0	0	0	0	0	0	0	0	0	0
S414	0	0	0	2	2	0	1	0	2	0	0	0	0	0	1	0	2	0	1	0	0	0	0	0	0	0	0	0	0	0	0	1	0	0	0	0	0	0	0	0	1	0	0	0	0	0	0	0	2
S430	0	0	0	2	2	2	1	0	0	0	0	0	0	2	1	0	2	0	0	0	0	0	2	0	0	0	0	0	2	0	0	1	0	0	0	0	0	0	0	1	0	0	1	0	0	0	0	0	2
S431	0	0	0	2	0	2	2	0	0	0	0	0	0	2	2	0	2	1	2	0	0	1	2	0	0	0	0	0	2	0	0	1	0	0	0	0	0	0	1	0	0	0	2	0	0	0	0	0	2
S432	0	0	0	2	2	2	2	0	2	2	0	0	0	0	0	0	2	0	0	0	0	0	2	0	0	0	0	0	2	0	0	1	0	0	0	0	0	0	0	0	0	0	0	0	0	0	0	0	2
S433	0	0	0	2	1	2	2	0	0	0	2	0	0	2	1	0	1	1	1	0	0	0	1	0	0	0	0	0	1	0	0	1	0	0	0	0	0	0	0	2	0	0	0	0	0	0	0	0	2
[truncated: 5,000 more columns]

## Sheet: supptable3
Table S3. Genetic gain for GY(t/hta) and OL(%) with indices from different selection models.
			model
selectSite	site	trait	PS	SGS	MGS	gxEGS	MTGS1	MTGS2	gxEMTGS1
IR	IR	GY	0.689	0.661	0.679	0.626	0.488	0.221	0.458
		OL	0.656	0.802	0.489	0.031	3.599	4.154	3.612
	RF	GY	0.284	0.265	0.291		0.085	-0.008
		OL	0.454	0.71	0.438		2.901	3.487
	LR	GY	0.025	0.026	0.027		0.004	-0.013
		OL	0.503	0.651	0.382		2.458	2.839
RF	IR	GY	0.349	0.375	0.345		0.329	0.193
		OL	-0.733	-0.44	-0.728		2.427	3.748
	RF	GY	0.422	0.403	0.407	0.338	0.252	0.018	0.106
		OL	-0.497	-0.333	-0.502	0.086	2.501	3.537	2.961
	LR	GY	0.029	0.021	0.03		0.011	-0.011
		OL	-0.621	-0.381	-0.72		1.741	2.642
LR	IR	GY	0.217	0.178	0.186		0.295	0.227
		OL	-0.32	-0.685	-0.22		2.478	3.935
	RF	GY	0.095	0.076	0.08		0.055	0.001
		OL	-0.253	-0.479	-0.169		1.952	3.238
	LR	GY	0.093	0.075	0.082	0.041	0.051	-0.009	0.012
		OL	-0.233	-0.536	-0.122	0.099	1.943	2.889	2.552

## Sheet: supptable4
Table S4. Top safflower accessions with high BLUEs and high GEBVs
Accession list	Country of origin	Info.
S41	Iran	Unknown
S55	Unknown	Unknown
S57	Unknown	Unknown
S64	Unknown	Advanced Cultivar
S66	Unknown	Advanced Cultivar
S90	Unknown	Unknown
S93	Unknown	Unknown
S94	Unknown	Unknown
S95	Unknown	Unknown
S97	Unknown	Unknown
S108	India	Unknown
S131	Unknown	Unknown
S138	Unknown	Unknown
S172	Unknown	Breeder's Line
S192	Unknown	Unknown
S194	Unknown	Advanced Cultivar
S203	Unknown	Breeder's Line
S309	Turkey	Unknown
S344	India	Unknown
S345	India	Unknown
S354	Sudan	Unknown
S355	Australia	Advanced Cultivar
S358	Canada	Advanced Cultivar
S359	Canada	Advanced Cultivar
S360	Canada	Advanced Cultivar
S364	United States	Advanced Cultivar
S365	United States	Advanced Cultivar
S367	United States	Advanced Cultivar
S368	United States	Advanced Cultivar
S372	United States	Unknown
S378	United States	Unknown
S411	Unknown	Unknown
S412	United States	Unknown
S413	Mexico	Unknown
S425	United States	Advanced Cultivar
S428	United States	Advanced Cultivar
S430	United States	Advanced Cultivar
