# Supplementary material for: Genomic prediction and selection response for grain yield in safflower
Source: Front Genet. 2023 Mar 27;14:1129433. doi: 10.3389/fgene.2023.1129433 (PMC10083426; doi:10.3389/fgene.2023.1129433)
Supplement: Supplementary file 2 [file Table1.DOCX]

**Genomic prediction and selection response for grain yield in safflower**

Huanhuan Zhao1,2*, Zibei Lin2, Majid Khansefid1,2, Josquin F. Tibbits2, Matthew J. Hayden1,2

1 School of Applied Systems Biology, La Trobe University, Bundoora, VIC 3083, Australia

2 Agriculture Victoria, AgriBio, Centre for AgriBioscience, Bundoora, VIC 3083, Australia

* Corresponding author Huanhuan Zhao, huan.zhao@agriculture.vic.gov.au


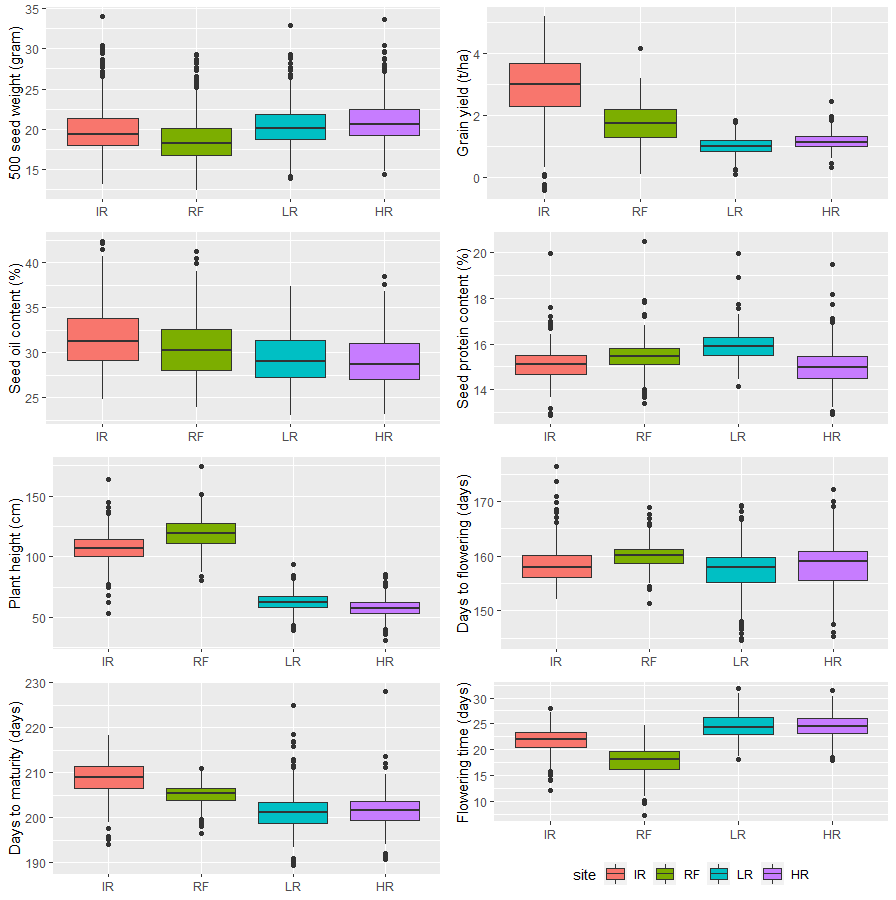


Supplementary Fig s1. Boxplot of safflower traits’ BLUEs in four sites.


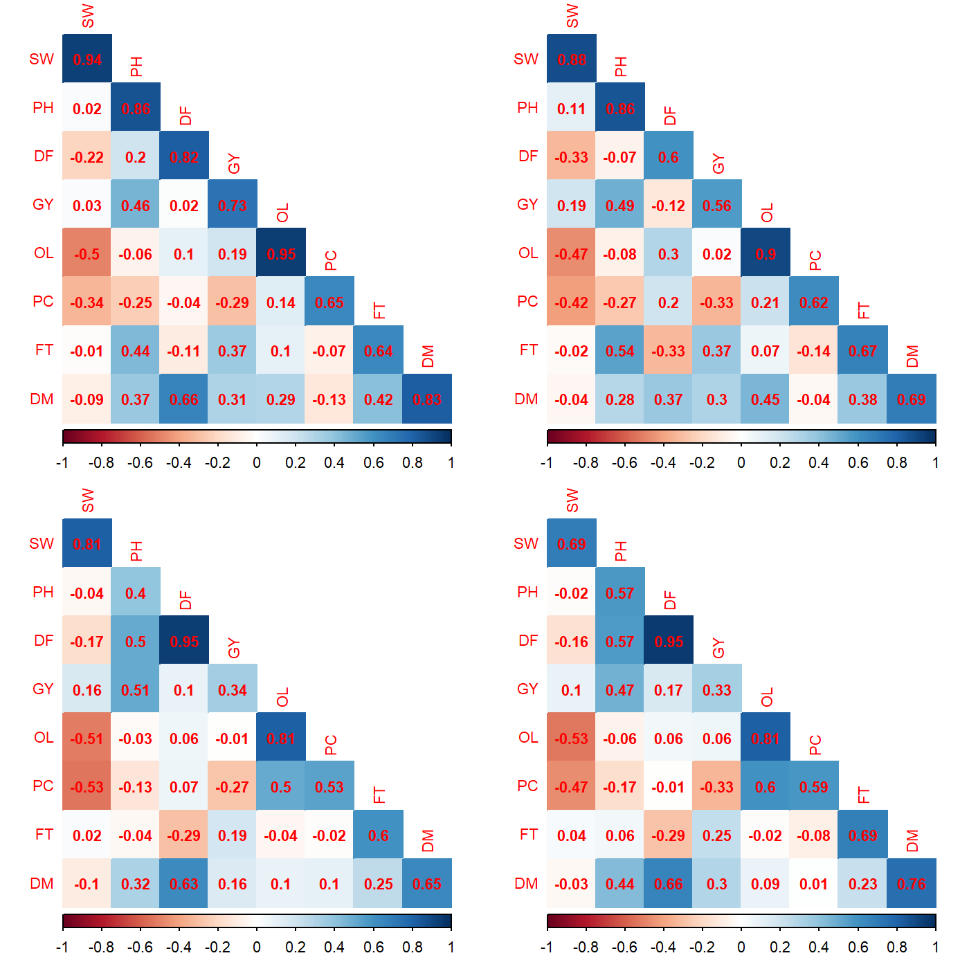


Supplementary Fig s2. The phenotypic correlation (rp, lower triangle) estimated by multivariate models among pairwise safflower traits in four field sites (clockwise, IR,RF,HR, IR). Color ranged from dark orange to dark blue indicates the correlation rp from -1 to 1.
